# Supplementary material for: Bridging the Gap: Combining Genomics and Transcriptomics Approaches to Understand Stylosanthes scabra, an Orphan Legume from the Brazilian Caatinga
Source: Plants (Basel). 2023 Sep 13;12(18):3246. doi: 10.3390/plants12183246 (PMC10535828; doi:10.3390/plants12183246)
Supplement: Supplementary file 1 [file plants-12-03246-s001.zip]

Archive with 10 entries (10 files):
- Supplementary Figure S1.pdf
- Supplementary Figure S2.pdf
- Supplementary Material 1.docx
- Supplementary Material 2.doc
- Supplementary Material 3.docx
- Supplementary Table S1.xlsx
- Supplementary Table S2.xlsx
- Supplementary Table S3.xlsx
- Supplementary Table S4.xlsx
- Supplementary Table S5.xlsx
