# Supplementary material for: Bridging the Gap: Combining Genomics and Transcriptomics Approaches to Understand Stylosanthes scabra, an Orphan Legume from the Brazilian Caatinga
Source: Plants (Basel). 2023 Sep 13;12(18):3246. doi: 10.3390/plants12183246 (PMC10535828; doi:10.3390/plants12183246)
Supplement: Supplementary file 1 [file plants-12-03246-s001.zip › Supplementary Table S1.xlsx]

## Sheet: Plan2
transcript ID	transcript ID	transcript sequence length	number of exons	total exon sequence length	number of introns	total intron sequence length	number of CDS chunks	total CDS sequence length	number of 5' UTR sequences	total 5' UTR sequence length	number of 3' UTR sequences	total 3' UTR sequence length
SSC_000002	SSC_000002-T1	974	1	974	0	0	1	909	0	0	1	65
SSC_000006	SSC_000006-T1	4352	6	1345	5	3007	5	702	2	356	1	287
SSC_000008	SSC_000008-T1	967	4	519	3	448	4	261	1	97	1	161
SSC_000009	SSC_000009-T1	4599	4	2147	3	2452	4	1533	1	224	1	390
SSC_000010	SSC_000010-T1	549	2	474	1	75	2	474	0	0	0	0
SSC_000012	SSC_000012-T1	478	2	267	1	211	2	267	0	0	0	0
SSC_000013	SSC_000013-T1	3154	4	2147	3	1007	4	1854	1	31	1	262
SSC_000014	SSC_000014-T1	4202	14	2484	13	1718	14	2484	0	0	0	0
SSC_000015	SSC_000015-T1	3455	5	2254	4	1201	5	1656	1	336	1	262
SSC_000020	SSC_000020-T1	3877	6	1769	5	2108	5	864	2	225	1	680
SSC_000021	SSC_000021-T1	3891	3	1363	2	2528	3	1176	1	15	1	172
SSC_000023	SSC_000023-T1	1154	2	918	1	236	2	918	0	0	0	0
SSC_000024	SSC_000024-T1	2569	3	804	2	1765	3	804	0	0	0	0
SSC_000031	SSC_000031-T1	3468	6	1364	5	2104	6	942	1	55	1	367
SSC_000032	SSC_000032-T1	684	1	684	0	0	1	684	0	0	0	0
SSC_000035	SSC_000035-T1	540	1	540	0	0	1	540	0	0	0	0
SSC_000036	SSC_000036-T1	984	2	402	1	582	2	240	0	0	1	162
SSC_000037	SSC_000037-T1	8590	16	1827	15	6763	15	1482	2	92	1	253
SSC_000038	SSC_000038-T1	7599	2	1322	2	6277	2	807	1	161	1	354
SSC_000040	SSC_000040-T1	3051	4	1218	3	1833	4	822	1	43	1	353
SSC_000043	SSC_000043-T1	2788	7	813	6	1975	7	813	0	0	0	0
SSC_000044	SSC_000044-T1	800	1	800	0	0	1	660	1	114	1	26
SSC_000046	SSC_000046-T1	11089	16	2706	15	8383	15	2217	2	135	1	354
SSC_000047	SSC_000047-T1	1971	2	1811	1	160	2	1314	1	72	1	425
SSC_000048	SSC_000048-T1	10025	29	3500	28	6525	29	3075	1	134	1	291
SSC_000049	SSC_000049-T1	3598	6	864	5	2734	6	864	0	0	0	0
SSC_000050	SSC_000050-T1	5015	11	2653	10	2362	11	2262	0	0	1	391
SSC_000051	SSC_000051-T1	7580	9	2948	8	4632	9	2289	1	96	1	563
SSC_000052	SSC_000052-T1	4382	11	2071	10	2311	11	1437	1	202	1	432
SSC_000054	SSC_000054-T1	1307	3	787	2	520	3	420	1	30	1	337
SSC_000055	SSC_000055-T1	1270	6	810	5	460	6	810	0	0	0	0
SSC_000059	SSC_000059-T1	715	3	306	2	409	3	306	0	0	0	0
SSC_000060	SSC_000060-T1	1659	2	1457	1	202	1	591	1	68	2	798
SSC_000061	SSC_000061-T1	6459	14	2060	13	4399	13	1620	2	440	0	0
SSC_000068	SSC_000068-T1	1191	2	936	1	255	2	903	1	33	0	0
SSC_000069	SSC_000069-T1	538	2	263	1	275	2	255	1	2	1	6
SSC_000070	SSC_000070-T1	3091	2	888	1	2203	2	888	0	0	0	0
SSC_000072	SSC_000072-T1	1562	1	1562	0	0	1	1404	0	0	1	158
SSC_000076	SSC_000076-T1	7186	3	1066	2	6120	3	906	1	55	1	105
SSC_000079	SSC_000079-T1	14477	19	3059	18	11418	19	2592	1	84	1	383
SSC_000080	SSC_000080-T1	3467	2	1945	1	1522	2	1278	1	309	1	358
SSC_000082	SSC_000082-T1	1185	1	1185	0	0	1	1185	0	0	0	0
SSC_000083	SSC_000083-T1	2802	6	1674	5	1128	6	1101	1	154	1	419
SSC_000084	SSC_000084-T1	3542	9	1147	8	2395	9	966	1	136	1	45
SSC_000085	SSC_000085-T1	909	5	489	4	420	5	489	0	0	0	0
SSC_000090	SSC_000090-T1	4382	4	774	3	3608	4	774	0	0	0	0
SSC_000091	SSC_000091-T1	1653	1	1653	0	0	1	1653	0	0	0	0
SSC_000092	SSC_000092-T1	774	1	774	0	0	1	774	0	0	0	0
SSC_000093	SSC_000093-T1	754	2	351	1	403	2	351	0	0	0	0
SSC_000094	SSC_000094-T1	1900	4	962	3	938	3	519	1	184	2	259
SSC_000095	SSC_000095-T1	3625	10	1188	9	2437	10	1188	0	0	0	0
SSC_000096	SSC_000096-T1	1185	1	1185	0	0	1	1185	0	0	0	0
SSC_000097	SSC_000097-T1	6371	12	2878	11	3493	12	2349	1	277	1	252
SSC_000098	SSC_000098-T1	8018	9	1126	9	6892	9	885	1	93	1	148
SSC_000099	SSC_000099-T1	1175	4	921	3	254	4	921	0	0	0	0
SSC_000104	SSC_000104-T1	2894	4	1271	3	1623	4	564	1	285	1	422
SSC_000106	SSC_000106-T1	629	2	576	1	53	2	576	0	0	0	0
SSC_000108	SSC_000108-T1	398	2	312	1	86	2	312	0	0	0	0
SSC_000109	SSC_000109-T1	3501	2	1158	1	2343	2	1158	0	0	0	0
SSC_000110	SSC_000110-T1	617	2	492	1	125	2	492	0	0	0	0
SSC_000114	SSC_000114-T1	399	2	309	1	90	2	309	0	0	0	0
SSC_000116	SSC_000116-T1	3341	5	1669	4	1672	5	1569	1	100	0	0
SSC_000117	SSC_000117-T1	7592	5	2018	4	5574	5	1575	1	94	1	349
SSC_000118	SSC_000118-T1	2371	3	1915	2	456	2	1440	0	0	2	475
SSC_000119	SSC_000119-T1	2948	5	959	4	1989	4	501	1	62	2	396
SSC_000120	SSC_000120-T1	2927	5	1201	4	1726	5	1149	1	52	0	0
SSC_000121	SSC_000121-T1	1454	4	648	3	806	4	345	1	171	1	132
SSC_000122	SSC_000122-T1	2697	5	892	4	1805	5	867	1	15	1	10
SSC_000123	SSC_000123-T1	1325	4	858	3	467	4	858	0	0	0	0
SSC_000124	SSC_000124-T1	559	1	559	0	0	1	519	0	0	1	40
SSC_000125	SSC_000125-T1	2168	5	522	4	1646	5	522	0	0	0	0
SSC_000127	SSC_000127-T1	3402	9	1219	8	2183	7	585	2	180	2	454
SSC_000128	SSC_000128-T1	6830	3	909	2	5921	3	909	0	0	0	0
SSC_000130	SSC_000130-T1	797	2	411	1	386	2	411	0	0	0	0
SSC_000131	SSC_000131-T1	1857	3	579	2	1278	3	579	0	0	0	0
SSC_000132	SSC_000132-T1	2177	2	540	1	1637	2	540	0	0	0	0
SSC_000133	SSC_000133-T1	1872	3	1414	2	458	3	1407	0	0	1	7
SSC_000136	SSC_000136-T1	1891	3	1224	2	667	3	1224	0	0	0	0
SSC_000137	SSC_000137-T1	1665	3	1395	2	270	3	1395	0	0	0	0
SSC_000138	SSC_000138-T1	873	2	711	1	162	2	711	0	0	0	0
SSC_000139	SSC_000139-T1	752	1	752	0	0	1	699	1	53	0	0
SSC_000140	SSC_000140-T1	1731	3	1404	2	327	3	1404	0	0	0	0
SSC_000141	SSC_000141-T1	5388	4	1261	3	4127	4	1077	1	70	1	114
SSC_000142	SSC_000142-T1	1890	5	1320	4	570	5	1320	0	0	0	0
SSC_000145	SSC_000145-T1	2764	4	1208	3	1556	4	1077	1	48	1	83
SSC_000147	SSC_000147-T1	1883	4	1728	3	155	4	1728	0	0	0	0
SSC_000153	SSC_000153-T1	4020	4	1089	3	2931	4	1089	0	0	0	0
SSC_000154	SSC_000154-T1	4639	3	684	2	3955	3	684	0	0	0	0
SSC_000155	SSC_000155-T1	3459	4	1095	3	2364	4	1095	0	0	0	0
SSC_000156	SSC_000156-T1	43817	4	1195	3	42622	4	1074	1	93	1	28
SSC_000157	SSC_000157-T1	2148	4	749	3	1399	3	249	2	219	1	281
SSC_000158	SSC_000158-T1	1102	2	444	1	658	2	444	0	0	0	0
SSC_000159	SSC_000159-T1	1177	2	513	1	664	2	513	0	0	0	0
SSC_000160	SSC_000160-T1	18323	4	1364	4	16959	4	1104	1	46	1	214
SSC_000161	SSC_000161-T1	666	3	366	2	300	3	366	0	0	0	0
SSC_000162	SSC_000162-T1	2875	3	178	2	2697	3	178	0	0	0	0
SSC_000164	SSC_000164-T1	2690	7	1448	6	1242	7	1209	1	74	1	165
SSC_000165	SSC_000165-T1	2315	7	1556	6	759	7	1245	1	87	1	224
SSC_000167	SSC_000167-T1	2048	5	1076	4	972	3	387	2	73	2	616
SSC_000168	SSC_000168-T1	1459	2	1373	1	86	2	1008	1	7	1	358
SSC_000169	SSC_000169-T1	19039	18	3405	17	15634	17	2823	2	233	1	349
SSC_000170	SSC_000170-T1	2801	5	1368	4	1433	5	939	1	57	1	372
SSC_000171	SSC_000171-T1	2665	3	1343	2	1322	3	891	1	244	1	208
SSC_000172	SSC_000172-T1	4702	5	1520	4	3182	5	1035	1	76	1	409
SSC_000173	SSC_000173-T1	3243	2	1350	1	1893	2	1350	0	0	0	0
SSC_000174	SSC_000174-T1	1946	2	1499	1	447	2	1359	1	70	1	70
SSC_000176	SSC_000176-T1	1227	1	1227	0	0	1	1227	0	0	0	0
SSC_000177	SSC_000177-T1	2252	4	1277	3	975	4	1080	1	23	1	174
SSC_000178	SSC_000178-T1	7349	20	3119	19	4230	19	2235	2	181	1	703
SSC_000179	SSC_000179-T1	4735	6	1344	5	3391	6	1344	0	0	0	0
SSC_000180	SSC_000180-T1	1248	1	1248	0	0	1	1143	1	50	1	55
SSC_000184	SSC_000184-T1	2349	6	867	5	1482	6	867	0	0	0	0
SSC_000185	SSC_000185-T1	752	1	752	0	0	1	333	1	187	1	232
SSC_000186	SSC_000186-T1	2859	5	1095	4	1764	5	666	1	118	1	311
SSC_000187	SSC_000187-T1	2308	1	2308	0	0	1	1368	1	605	1	335
SSC_000188	SSC_000188-T1	1315	3	921	2	394	3	921	0	0	0	0
SSC_000189	SSC_000189-T1	889	1	889	0	0	1	771	1	50	1	68
SSC_000190	SSC_000190-T1	1047	1	1047	0	0	1	384	1	159	1	504
SSC_000191	SSC_000191-T1	1941	1	1941	0	0	1	1941	0	0	0	0
SSC_000193	SSC_000193-T1	1489	5	1105	4	384	5	903	1	110	1	92
SSC_000194	SSC_000194-T1	4003	10	1540	9	2463	9	1314	0	0	2	226
SSC_000195	SSC_000195-T1	8682	13	2588	12	6094	13	2346	0	0	1	242
SSC_000197	SSC_000197-T1	383	2	300	1	83	2	300	0	0	0	0
SSC_000199	SSC_000199-T1	1677	5	817	4	860	5	723	0	0	1	94
SSC_000200	SSC_000200-T1	5294	18	2419	17	2875	18	2166	1	49	1	204
SSC_000201	SSC_000201-T1	2229	3	806	2	1423	3	333	1	54	1	419
SSC_000202	SSC_000202-T1	621	2	508	1	113	2	360	0	0	1	148
SSC_000205	SSC_000205-T1	1593	2	1482	1	111	2	1482	0	0	0	0
SSC_000206	SSC_000206-T1	3121	8	1788	7	1333	8	1560	1	73	1	155
SSC_000207	SSC_000207-T1	2427	7	1195	6	1232	7	672	1	227	1	296
SSC_000208	SSC_000208-T1	1395	3	1219	2	176	3	954	1	56	1	209
SSC_000210	SSC_000210-T1	1164	1	1164	0	0	1	720	1	222	1	222
SSC_000211	SSC_000211-T1	1881	1	1881	0	0	1	1842	1	17	1	22
SSC_000213	SSC_000213-T1	1808	2	1731	1	77	2	1731	0	0	0	0
SSC_000214	SSC_000214-T1	2845	6	1434	5	1411	6	1434	0	0	0	0
SSC_000215	SSC_000215-T1	2321	4	1857	3	464	4	1857	0	0	0	0
SSC_000216	SSC_000216-T1	2284	5	1193	4	1091	4	774	2	222	1	197
SSC_000218	SSC_000218-T1	7764	18	3251	17	4513	18	2874	0	0	1	377
SSC_000219	SSC_000219-T1	2506	6	1339	5	1167	5	1101	2	110	1	128
SSC_000221	SSC_000221-T1	3892	7	2223	6	1669	5	1230	3	795	1	198
SSC_000222	SSC_000222-T1	1198	4	934	3	264	4	705	1	46	1	183
SSC_000223	SSC_000223-T1	4895	17	2253	16	2642	17	1959	1	34	1	260
SSC_000224	SSC_000224-T1	903	2	827	1	76	2	657	1	106	1	64
SSC_000225	SSC_000225-T1	973	2	860	1	113	2	483	1	123	1	254
SSC_000226	SSC_000226-T1	1035	2	751	1	284	2	477	1	75	1	199
SSC_000227	SSC_000227-T1	880	2	792	1	88	2	477	1	73	1	242
SSC_000228	SSC_000228-T1	2928	3	843	2	2085	3	843	0	0	0	0
SSC_000229	SSC_000229-T1	1839	5	971	4	868	5	663	1	95	1	213
SSC_000231	SSC_000231-T1	1811	2	1708	1	103	2	1032	1	45	1	631
SSC_000232	SSC_000232-T1	3669	5	2484	4	1185	5	2484	0	0	0	0
SSC_000235	SSC_000235-T1	669	3	444	2	225	3	444	0	0	0	0
SSC_000236	SSC_000236-T1	650	3	438	2	212	3	438	0	0	0	0
SSC_000237	SSC_000237-T1	1777	3	1121	2	656	3	741	1	129	1	251
SSC_000238	SSC_000238-T1	3373	5	2816	4	557	5	2724	0	0	1	92
SSC_000239	SSC_000239-T1	1104	2	894	1	210	2	894	0	0	0	0
SSC_000240	SSC_000240-T1	5349	14	2191	13	3158	14	1542	1	197	1	452
SSC_000241	SSC_000241-T1	1662	4	1389	3	273	4	1389	0	0	0	0
SSC_000244	SSC_000244-T1	8211	4	1418	3	6793	4	1332	0	0	1	86
SSC_000245	SSC_000245-T1	1455	1	1455	0	0	1	1128	1	126	1	201
SSC_000246	SSC_000246-T1	3428	4	1974	3	1454	4	1629	1	75	1	270
SSC_000247	SSC_000247-T1	3351	7	2591	6	760	5	1893	3	169	1	529
SSC_000248	SSC_000248-T1	4308	6	1146	5	3162	6	1146	0	0	0	0
SSC_000249	SSC_000249-T1	635	3	467	2	168	2	186	2	42	1	239
SSC_000250	SSC_000250-T1	5046	15	2308	14	2738	15	1704	1	225	1	379
SSC_000251	SSC_000251-T1	10769	24	3505	23	7264	24	2619	1	187	1	699
SSC_000252	SSC_000252-T1	1714	7	944	6	770	7	546	1	105	1	293
SSC_000253	SSC_000253-T1	2571	3	1944	2	627	3	300	1	48	1	1596
SSC_000256	SSC_000256-T1	1325	3	695	2	630	3	651	1	25	0	0
SSC_000257	SSC_000257-T1	1278	1	1278	0	0	1	1278	0	0	0	0
SSC_000258	SSC_000258-T1	1527	4	515	3	1012	3	312	1	29	2	174
SSC_000260	SSC_000260-T1	5704	13	2007	12	3697	13	2007	0	0	0	0
SSC_000262	SSC_000262-T1	707	2	626	1	81	2	363	1	61	1	202
SSC_000263	SSC_000263-T1	2523	1	2523	0	0	1	2508	0	0	1	15
SSC_000264	SSC_000264-T1	658	1	658	0	0	1	546	1	35	1	77
SSC_000265	SSC_000265-T1	3638	15	1698	14	1940	15	1620	0	0	1	78
SSC_000266	SSC_000266-T1	2270	3	1119	2	1151	3	792	1	173	1	154
SSC_000267	SSC_000267-T1	1767	3	1180	2	587	3	789	1	220	1	171
SSC_000268	SSC_000268-T1	1863	3	1299	2	564	3	1299	0	0	0	0
SSC_000269	SSC_000269-T1	1080	1	1080	0	0	1	1080	0	0	0	0
SSC_000270	SSC_000270-T1	802	2	741	1	61	2	741	0	0	0	0
SSC_000271	SSC_000271-T1	1076	2	1032	1	44	2	1032	0	0	0	0
SSC_000272	SSC_000272-T1	8948	6	2370	5	6578	6	2370	0	0	0	0
SSC_000275	SSC_000275-T1	900	1	900	0	0	1	498	1	73	1	329
SSC_000276	SSC_000276-T1	4946	17	2714	16	2232	17	2376	0	0	1	338
SSC_000277	SSC_000277-T1	1277	1	1277	0	0	1	639	1	383	1	255
SSC_000278	SSC_000278-T1	2942	6	1213	5	1729	6	576	1	41	1	596
SSC_000282	SSC_000282-T1	2369	1	2369	0	0	1	1980	1	173	1	216
SSC_000283	SSC_000283-T1	2721	3	1419	2	1302	3	1092	1	42	1	285
SSC_000285	SSC_000285-T1	1166	3	913	2	253	3	672	1	47	1	194
SSC_000288	SSC_000288-T1	680	2	342	1	338	2	342	0	0	0	0
SSC_000290	SSC_000290-T1	2946	7	1865	6	1081	7	1710	0	0	1	155
SSC_000291	SSC_000291-T1	4995	10	2852	9	2143	9	2256	2	222	1	374
SSC_000292	SSC_000292-T1	3841	2	2310	1	1531	2	1887	1	50	1	373
SSC_000293	SSC_000293-T1	6711	4	1231	3	5480	4	1029	1	93	1	109
SSC_000296	SSC_000296-T1	7773	11	2459	10	5314	11	1638	1	490	1	331
SSC_000297	SSC_000297-T1	1637	2	1479	1	158	2	1137	1	98	1	244
SSC_000298	SSC_000298-T1	2001	7	1034	6	967	5	543	1	24	3	467
SSC_000299	SSC_000299-T1	6471	17	2431	16	4040	17	1890	1	121	1	420
SSC_000301	SSC_000301-T1	4947	12	3708	11	1239	12	3708	0	0	0	0
SSC_000302	SSC_000302-T1	5169	12	3851	11	1318	12	3831	0	0	1	20
SSC_000303	SSC_000303-T1	3514	7	2556	6	958	7	1818	1	197	1	541
SSC_000305	SSC_000305-T1	770	1	770	0	0	1	732	1	35	1	3
SSC_000310	SSC_000310-T1	806	2	705	1	101	2	705	0	0	0	0
SSC_000313	SSC_000313-T1	471	1	471	0	0	1	471	0	0	0	0
SSC_000314	SSC_000314-T1	1101	1	1101	0	0	1	891	1	210	0	0
SSC_000315	SSC_000315-T1	1270	5	471	4	799	5	471	0	0	0	0
SSC_000316	SSC_000316-T1	965	3	499	2	466	2	309	2	190	0	0
SSC_000317	SSC_000317-T1	2192	3	1073	2	1119	3	615	1	166	1	292
SSC_000319	SSC_000319-T1	8607	15	1912	14	6695	14	1515	2	210	1	187
SSC_000320	SSC_000320-T1	837	1	837	0	0	1	519	1	113	1	205
SSC_000322	SSC_000322-T1	4495	4	1956	3	2539	3	987	2	323	1	646
SSC_000325	SSC_000325-T1	804	2	717	1	87	2	717	0	0	0	0
SSC_000329	SSC_000329-T1	910	1	910	0	0	1	810	1	100	0	0
SSC_000333	SSC_000333-T1	1522	2	567	1	955	2	567	0	0	0	0
SSC_000335	SSC_000335-T1	456	2	360	1	96	2	360	0	0	0	0
SSC_000337	SSC_000337-T1	986	1	986	0	0	1	966	0	0	1	20
SSC_000338	SSC_000338-T1	1572	1	1572	0	0	1	1572	0	0	0	0
SSC_000340	SSC_000340-T1	1740	4	1533	3	207	4	1533	0	0	0	0
SSC_000341	SSC_000341-T1	3801	7	778	6	3023	7	471	1	68	1	239
SSC_000343	SSC_000343-T1	5278	10	1913	9	3365	10	1290	1	115	1	508
SSC_000345	SSC_000345-T1	1124	2	891	1	233	2	891	0	0	0	0
SSC_000346	SSC_000346-T1	4435	3	1089	2	3346	3	840	1	182	1	67
SSC_000347	SSC_000347-T1	481	1	481	0	0	1	378	1	14	1	89
SSC_000350	SSC_000350-T1	2286	2	705	1	1581	2	705	0	0	0	0
SSC_000351	SSC_000351-T1	2212	2	1315	1	897	2	921	1	124	1	270
SSC_000352	SSC_000352-T1	4655	7	2952	6	1703	7	1938	1	332	1	682
SSC_000359	SSC_000359-T1	2040	2	1864	1	176	2	1827	0	0	1	37
SSC_000361	SSC_000361-T1	4811	10	2160	9	2651	9	1602	2	170	1	388
SSC_000365	SSC_000365-T1	615	1	615	0	0	1	615	0	0	0	0
SSC_000380	SSC_000380-T1	743	2	642	1	101	2	642	0	0	0	0
SSC_000383	SSC_000383-T1	2236	2	1662	1	574	2	1149	1	60	1	453
SSC_000384	SSC_000384-T1	4213	4	2180	3	2033	2	1248	2	64	2	868
SSC_000385	SSC_000385-T1	1908	2	1296	1	612	2	1098	1	10	1	188
SSC_000386	SSC_000386-T1	704	2	438	1	266	2	438	0	0	0	0
SSC_000387	SSC_000387-T1	330	1	330	0	0	1	330	0	0	0	0
SSC_000388	SSC_000388-T1	3473	4	993	3	2480	4	594	1	28	1	371
SSC_000389	SSC_000389-T1	9102	5	4338	4	4764	5	4299	0	0	1	39
SSC_000392	SSC_000392-T1	8363	5	4155	4	4208	5	4125	0	0	1	30
SSC_000393	SSC_000393-T1	7028	5	4127	4	2901	5	3441	0	0	1	686
SSC_000394	SSC_000394-T1	2310	1	2310	0	0	1	1917	1	82	1	311
SSC_000395	SSC_000395-T1	1930	3	1695	2	235	3	1695	0	0	0	0
SSC_000396	SSC_000396-T1	4379	7	1178	6	3201	7	870	1	74	1	234
SSC_000398	SSC_000398-T1	1736	2	354	1	1382	2	354	0	0	0	0
SSC_000400	SSC_000400-T1	4461	6	1857	5	2604	6	921	1	306	1	630
SSC_000402	SSC_000402-T1	2324	3	1741	2	583	3	948	1	195	1	598
SSC_000404	SSC_000404-T1	3597	6	789	5	2808	6	789	0	0	0	0
SSC_000405	SSC_000405-T1	1803	1	1803	0	0	1	1803	0	0	0	0
SSC_000406	SSC_000406-T1	519	3	366	2	153	3	366	0	0	0	0
SSC_000409	SSC_000409-T1	345	1	345	0	0	1	345	0	0	0	0
SSC_000410	SSC_000410-T1	2903	2	1338	1	1565	2	1338	0	0	0	0
SSC_000412	SSC_000412-T1	1535	4	875	3	660	4	471	1	44	1	360
SSC_000414	SSC_000414-T1	5073	6	1480	5	3593	5	1128	2	217	1	135
SSC_000415	SSC_000415-T1	3635	6	1660	5	1975	6	1185	1	120	1	355
SSC_000417	SSC_000417-T1	2422	10	1197	9	1225	10	1197	0	0	0	0
SSC_000418	SSC_000418-T1	3410	7	987	6	2423	6	663	1	139	2	185
SSC_000420	SSC_000420-T1	5186	17	2217	16	2969	17	2217	0	0	0	0
SSC_000422	SSC_000422-T1	1454	1	1454	0	0	1	861	1	36	1	557
SSC_000424	SSC_000424-T1	957	1	957	0	0	1	957	0	0	0	0
SSC_000429	SSC_000429-T1	3126	12	1542	11	1584	12	1542	0	0	0	0
SSC_000430	SSC_000430-T1	3827	9	1586	8	2241	9	1260	1	80	1	246
SSC_000433	SSC_000433-T1	4265	9	1574	8	2691	9	1443	1	131	0	0
SSC_000436	SSC_000436-T1	13842	10	2325	9	11517	10	1596	1	146	1	583
SSC_000437	SSC_000437-T1	4617	8	1654	7	2963	8	1005	1	146	1	503
SSC_000442	SSC_000442-T1	1333	4	1046	3	287	4	483	1	97	1	466
SSC_000443	SSC_000443-T1	4595	11	1711	11	2884	10	1020	0	0	2	691
SSC_000444	SSC_000444-T1	4040	8	2519	7	1521	8	2295	0	0	1	224
SSC_000452	SSC_000452-T1	718	3	567	2	151	3	567	0	0	0	0
SSC_000459	SSC_000459-T1	764	2	684	1	80	2	591	0	0	1	93
SSC_000461	SSC_000461-T1	6440	15	2347	14	4093	14	1635	2	426	1	286
SSC_000466	SSC_000466-T1	2477	3	1374	2	1103	3	1374	0	0	0	0
SSC_000467	SSC_000467-T1	468	2	393	1	75	2	393	0	0	0	0
SSC_000469	SSC_000469-T1	4395	6	1306	5	3089	6	1248	1	58	0	0
SSC_000471	SSC_000471-T1	11449	21	2636	20	8813	17	2283	2	35	4	318
SSC_000475	SSC_000475-T1	2545	1	2545	0	0	1	2196	1	61	1	288
SSC_000476	SSC_000476-T1	8646	13	3507	12	5139	13	2946	1	224	1	337
SSC_000480	SSC_000480-T1	3072	4	1107	3	1965	4	792	1	133	1	182
SSC_000481	SSC_000481-T1	3206	3	801	2	2405	3	801	0	0	0	0
SSC_000482	SSC_000482-T1	9074	8	936	7	8138	8	795	1	91	1	50
SSC_000487	SSC_000487-T1	3954	2	396	1	3558	2	396	0	0	0	0
SSC_000490	SSC_000490-T1	6496	10	1519	9	4977	10	807	1	285	1	427
SSC_000492	SSC_000492-T1	5518	9	2112	8	3406	9	1155	1	552	1	405
SSC_000495	SSC_000495-T1	2638	2	1761	1	877	2	1257	1	237	1	267
SSC_000496	SSC_000496-T1	5419	10	2778	9	2641	10	2571	0	0	1	207
SSC_000497	SSC_000497-T1	1311	1	1311	0	0	1	1311	0	0	0	0
SSC_000501	SSC_000501-T1	496	2	387	1	109	2	387	0	0	0	0
SSC_000503	SSC_000503-T1	5118	9	1288	8	3830	9	888	1	210	1	190
SSC_000504	SSC_000504-T1	930	1	930	0	0	1	930	0	0	0	0
SSC_000505	SSC_000505-T1	6769	12	3443	11	3326	12	3039	0	0	1	404
SSC_000509	SSC_000509-T1	1046	4	591	3	455	4	591	0	0	0	0
SSC_000510	SSC_000510-T1	2514	2	396	1	2118	2	396	0	0	0	0
SSC_000512	SSC_000512-T1	5490	6	1488	5	4002	6	1488	0	0	0	0
SSC_000513	SSC_000513-T1	4668	11	938	10	3730	11	654	1	159	1	125
SSC_000516	SSC_000516-T1	1019	3	762	2	257	3	762	0	0	0	0
SSC_000518	SSC_000518-T1	1053	3	732	2	321	3	360	1	194	1	178
SSC_000528	SSC_000528-T1	8006	2	357	1	7649	2	357	0	0	0	0
SSC_000530	SSC_000530-T1	459	1	459	0	0	1	459	0	0	0	0
SSC_000531	SSC_000531-T1	759	3	453	2	306	3	453	0	0	0	0
SSC_000535	SSC_000535-T1	4985	6	1784	5	3201	4	906	0	0	3	878
SSC_000536	SSC_000536-T1	758	3	549	2	209	3	549	0	0	0	0
SSC_000542	SSC_000542-T1	18441	38	3855	37	14586	38	3447	0	0	1	408
SSC_000543	SSC_000543-T1	3921	3	2481	2	1440	3	2481	0	0	0	0
SSC_000544	SSC_000544-T1	3006	8	2297	7	709	8	1815	1	66	1	416
SSC_000545	SSC_000545-T1	2800	6	2002	5	798	6	1605	1	54	1	343
SSC_000546	SSC_000546-T1	2874	6	2311	5	563	6	2169	0	0	1	142
SSC_000547	SSC_000547-T1	3371	5	2594	4	777	5	2313	0	0	1	281
SSC_000548	SSC_000548-T1	1558	4	1284	3	274	4	864	1	163	1	257
SSC_000549	SSC_000549-T1	1687	3	1527	2	160	3	1527	0	0	0	0
SSC_000550	SSC_000550-T1	1573	8	687	7	886	8	687	0	0	0	0
SSC_000552	SSC_000552-T1	3276	9	2091	8	1185	9	2091	0	0	0	0
SSC_000554	SSC_000554-T1	986	4	741	3	245	4	741	0	0	0	0
SSC_000555	SSC_000555-T1	3675	10	1908	9	1767	10	1908	0	0	0	0
SSC_000557	SSC_000557-T1	1708	2	1606	1	102	2	1587	0	0	1	19
SSC_000558	SSC_000558-T1	555	1	555	0	0	1	555	0	0	0	0
SSC_000559	SSC_000559-T1	2792	2	2135	1	657	2	1413	1	424	1	298
SSC_000560	SSC_000560-T1	3334	14	1536	13	1798	14	1536	0	0	0	0
SSC_000561	SSC_000561-T1	3712	18	1413	17	2299	18	1413	0	0	0	0
SSC_000562	SSC_000562-T1	2569	1	2569	0	0	1	2073	1	358	1	138
SSC_000564	SSC_000564-T1	1779	4	564	3	1215	4	318	1	68	1	178
SSC_000565	SSC_000565-T1	3915	4	2593	3	1322	2	1932	3	311	1	350
SSC_000568	SSC_000568-T1	2810	5	1278	4	1532	4	639	2	238	1	401
SSC_000569	SSC_000569-T1	529	3	270	2	259	3	270	0	0	0	0
SSC_000570	SSC_000570-T1	4055	11	1563	10	2492	11	1563	0	0	0	0
SSC_000571	SSC_000571-T1	1673	4	1368	3	305	4	936	1	25	1	407
SSC_000572	SSC_000572-T1	547	1	547	0	0	1	450	1	7	1	90
SSC_000573	SSC_000573-T1	2366	2	2083	1	283	2	1767	1	119	1	197
SSC_000574	SSC_000574-T1	2624	2	2066	1	558	2	1599	1	152	1	315
SSC_000575	SSC_000575-T1	3141	3	2240	2	901	3	1590	1	234	1	416
SSC_000576	SSC_000576-T1	1997	5	1667	4	330	5	1410	1	13	1	244
SSC_000577	SSC_000577-T1	2510	3	2302	2	208	3	2127	1	24	1	151
SSC_000579	SSC_000579-T1	1818	3	1632	2	186	3	1104	1	37	1	491
SSC_000581	SSC_000581-T1	465	2	348	1	117	2	348	0	0	0	0
SSC_000582	SSC_000582-T1	1307	2	1224	1	83	2	1053	0	0	1	171
SSC_000583	SSC_000583-T1	2237	3	1503	2	734	3	1503	0	0	0	0
SSC_000584	SSC_000584-T1	4456	16	1813	15	2643	16	1458	1	31	1	324
SSC_000585	SSC_000585-T1	807	2	638	1	169	2	420	1	107	1	111
SSC_000588	SSC_000588-T1	3095	10	1764	9	1331	10	1104	1	124	1	536
SSC_000589	SSC_000589-T1	1263	2	1159	1	104	2	858	1	178	1	123
SSC_000590	SSC_000590-T1	3336	5	1921	4	1415	5	1146	1	222	0	0
SSC_000591	SSC_000591-T1	4126	5	2940	4	1186	5	2940	0	0	0	0
SSC_000592	SSC_000592-T1	3401	4	1795	3	1606	4	966	1	443	1	386
SSC_000593	SSC_000593-T1	1029	2	717	1	312	2	690	0	0	1	27
SSC_000595	SSC_000595-T1	8193	14	3761	13	4432	14	2757	1	67	1	937
SSC_000596	SSC_000596-T1	843	1	843	0	0	1	711	1	91	1	41
SSC_000597	SSC_000597-T1	893	2	822	1	71	2	822	0	0	0	0
SSC_000599	SSC_000599-T1	2277	5	1318	4	959	5	720	0	0	1	598
SSC_000600	SSC_000600-T1	4251	16	2745	15	1506	16	2535	0	0	1	210
SSC_000601	SSC_000601-T1	5798	9	3116	8	2682	9	2418	1	205	1	493
SSC_000602	SSC_000602-T1	899	3	477	2	422	3	477	0	0	0	0
SSC_000604	SSC_000604-T1	926	1	926	0	0	1	576	1	96	1	254
SSC_000605	SSC_000605-T1	1086	1	1086	0	0	1	579	1	43	1	464
SSC_000608	SSC_000608-T1	648	1	648	0	0	1	564	1	32	1	52
SSC_000610	SSC_000610-T1	2472	2	2379	1	93	2	2364	0	0	1	15
SSC_000611	SSC_000611-T1	533	3	312	2	221	3	312	0	0	0	0
SSC_000612	SSC_000612-T1	1163	4	804	3	359	4	804	0	0	0	0
SSC_000614	SSC_000614-T1	1114	1	1114	0	0	1	879	1	116	1	119
SSC_000615	SSC_000615-T1	1307	4	795	3	512	4	480	1	10	0	0
SSC_000616	SSC_000616-T1	3518	3	2408	2	1110	2	1920	2	123	1	365
SSC_000617	SSC_000617-T1	3153	6	1502	5	1651	6	1146	1	69	1	287
SSC_000619	SSC_000619-T1	2476	5	1323	4	1153	5	1323	0	0	0	0
SSC_000621	SSC_000621-T1	1904	3	1066	2	838	3	633	1	120	1	313
SSC_000622	SSC_000622-T1	730	2	625	1	105	2	273	1	93	1	259
SSC_000625	SSC_000625-T1	1169	3	969	2	200	3	969	0	0	0	0
SSC_000626	SSC_000626-T1	3670	7	2423	6	1247	7	1023	1	155	1	1245
SSC_000628	SSC_000628-T1	2897	7	1299	6	1598	7	1299	0	0	0	0
SSC_000630	SSC_000630-T1	1834	3	385	2	1449	3	270	1	115	0	0
SSC_000631	SSC_000631-T1	1431	5	872	4	559	5	735	0	0	1	137
SSC_000632	SSC_000632-T1	3611	3	2230	2	1381	2	1734	2	230	1	266
SSC_000633	SSC_000633-T1	4844	9	2781	8	2063	8	2094	2	456	1	231
SSC_000634	SSC_000634-T1	5679	7	3109	6	2570	7	2115	1	269	1	725
SSC_000635	SSC_000635-T1	3001	2	2826	1	175	2	2565	0	0	1	261
SSC_000636	SSC_000636-T1	523	2	428	1	95	2	381	0	0	1	47
SSC_000638	SSC_000638-T1	981	1	981	0	0	1	981	0	0	0	0
SSC_000639	SSC_000639-T1	2197	8	1399	7	798	8	915	1	236	1	248
SSC_000640	SSC_000640-T1	1374	3	1179	2	195	3	1179	0	0	0	0
SSC_000642	SSC_000642-T1	3879	12	1032	11	2847	12	1032	0	0	0	0
SSC_000643	SSC_000643-T1	1065	3	834	2	231	3	357	1	49	1	428
SSC_000645	SSC_000645-T1	3775	3	2494	2	1281	3	2043	1	59	1	392
SSC_000646	SSC_000646-T1	2954	10	1037	9	1917	10	1035	0	0	1	2
SSC_000647	SSC_000647-T1	1847	6	1344	5	503	6	1344	0	0	0	0
SSC_000648	SSC_000648-T1	3783	8	2094	7	1689	8	1554	1	99	1	441
SSC_000649	SSC_000649-T1	4610	15	2909	14	1701	15	2451	1	108	1	350
SSC_000651	SSC_000651-T1	1919	2	1808	1	111	2	1335	1	247	1	226
SSC_000653	SSC_000653-T1	627	1	627	0	0	1	627	0	0	0	0
SSC_000654	SSC_000654-T1	5738	15	2643	14	3095	15	2643	0	0	0	0
SSC_000655	SSC_000655-T1	1086	2	870	1	216	2	672	1	106	1	92
SSC_000656	SSC_000656-T1	7194	14	2893	14	4301	14	2304	1	171	1	418
SSC_000657	SSC_000657-T1	3165	10	1478	9	1687	10	1107	1	83	1	288
SSC_000658	SSC_000658-T1	1963	5	1512	4	451	5	1512	0	0	0	0
SSC_000659	SSC_000659-T1	899	2	783	1	116	2	678	1	6	1	99
SSC_000660	SSC_000660-T1	1395	3	1185	2	210	3	714	1	174	1	297
SSC_000661	SSC_000661-T1	1752	5	1377	4	375	5	1377	0	0	0	0
SSC_000662	SSC_000662-T1	1903	5	860	4	1043	5	546	1	93	1	221
SSC_000663	SSC_000663-T1	1452	4	899	3	553	3	396	1	95	2	408
SSC_000664	SSC_000664-T1	2600	6	1515	5	1085	6	1143	1	29	1	343
SSC_000665	SSC_000665-T1	725	2	622	1	103	2	300	1	43	1	279
SSC_000667	SSC_000667-T1	1185	5	861	4	324	2	408	1	68	4	385
SSC_000668	SSC_000668-T1	1839	3	1631	2	208	3	1482	0	0	1	149
SSC_000669	SSC_000669-T1	3551	4	2643	3	908	4	1842	1	409	1	392
SSC_000670	SSC_000670-T1	1419	3	1220	2	199	3	951	0	0	1	269
SSC_000674	SSC_000674-T1	1262	4	942	3	320	4	672	1	11	1	259
SSC_000675	SSC_000675-T1	847	4	604	3	243	4	492	0	0	1	112
SSC_000677	SSC_000677-T1	2264	1	2264	0	0	1	2031	1	153	1	80
SSC_000678	SSC_000678-T1	1467	3	1272	2	195	3	864	1	209	1	199
SSC_000679	SSC_000679-T1	4283	12	1845	11	2438	12	1308	1	3	0	0
SSC_000680	SSC_000680-T1	2696	7	1701	6	995	7	1701	0	0	0	0
SSC_000682	SSC_000682-T1	14149	34	5723	33	8426	34	5505	0	0	1	218
SSC_000684	SSC_000684-T1	890	2	813	1	77	2	813	0	0	0	0
SSC_000686	SSC_000686-T1	2374	8	990	7	1384	6	513	1	111	3	366
SSC_000687	SSC_000687-T1	3058	5	1873	4	1185	5	1125	1	456	1	292
SSC_000688	SSC_000688-T1	3218	7	2141	6	1077	7	2025	0	0	1	116
SSC_000689	SSC_000689-T1	642	3	414	2	228	3	414	0	0	0	0
SSC_000690	SSC_000690-T1	2176	6	1631	5	545	6	1155	1	14	0	0
SSC_000691	SSC_000691-T1	4444	6	1995	5	2449	6	1629	1	120	1	246
SSC_000692	SSC_000692-T1	897	3	709	2	188	3	621	1	6	1	82
SSC_000693	SSC_000693-T1	4284	8	3308	7	976	8	3048	0	0	1	260
SSC_000694	SSC_000694-T1	5332	14	1201	13	4131	14	1038	0	0	1	163
SSC_000698	SSC_000698-T1	3965	4	1698	3	2267	3	1068	2	388	1	242
SSC_000699	SSC_000699-T1	552	3	396	2	156	3	396	0	0	0	0
SSC_000701	SSC_000701-T1	904	2	801	1	103	2	801	0	0	0	0
SSC_000702	SSC_000702-T1	4092	11	1404	10	2688	11	1404	0	0	0	0
SSC_000704	SSC_000704-T1	1967	1	1967	0	0	1	1803	1	61	1	103
SSC_000706	SSC_000706-T1	601	1	601	0	0	1	369	1	152	1	80
SSC_000707	SSC_000707-T1	5860	13	1988	12	3872	13	1524	1	184	1	280
SSC_000710	SSC_000710-T1	1124	2	408	1	716	2	408	0	0	0	0
SSC_000715	SSC_000715-T1	2536	6	783	5	1753	6	783	0	0	0	0
SSC_000716	SSC_000716-T1	6443	15	2425	14	4018	14	2349	2	76	0	0
SSC_000717	SSC_000717-T1	5001	9	1056	8	3945	9	1056	0	0	0	0
SSC_000719	SSC_000719-T1	13441	21	5212	20	8229	21	4959	0	0	1	253
SSC_000720	SSC_000720-T1	12475	4	3243	3	9232	4	3243	0	0	0	0
SSC_000721	SSC_000721-T1	563	3	366	2	197	3	366	0	0	0	0
SSC_000725	SSC_000725-T1	1104	2	231	1	873	2	231	0	0	0	0
SSC_000726	SSC_000726-T1	3245	6	1008	5	2237	5	690	2	99	1	219
SSC_000727	SSC_000727-T1	429	2	357	1	72	2	357	0	0	0	0
SSC_000728	SSC_000728-T1	1888	2	1559	1	329	2	888	1	313	1	358
SSC_000729	SSC_000729-T1	1628	2	1278	1	350	2	1278	0	0	0	0
SSC_000731	SSC_000731-T1	1187	1	1187	0	0	1	861	1	95	1	231
SSC_000732	SSC_000732-T1	4382	12	1657	11	2725	12	1542	0	0	1	115
SSC_000733	SSC_000733-T1	1225	3	638	2	587	2	507	2	131	0	0
SSC_000735	SSC_000735-T1	2735	5	1582	4	1153	3	807	3	375	1	400
SSC_000737	SSC_000737-T1	5932	3	1604	3	4328	3	1293	1	26	1	285
SSC_000738	SSC_000738-T1	3104	8	991	7	2113	8	861	1	63	1	67
SSC_000741	SSC_000741-T1	1840	2	1266	1	574	1	519	2	269	1	478
SSC_000743	SSC_000743-T1	7469	14	2532	13	4937	14	2532	0	0	0	0
SSC_000744	SSC_000744-T1	1457	5	729	4	728	5	459	0	0	1	270
SSC_000747	SSC_000747-T1	3699	13	1362	12	2337	13	1362	0	0	0	0
SSC_000748	SSC_000748-T1	6605	6	4673	5	1932	6	4575	0	0	1	98
SSC_000749	SSC_000749-T1	2977	2	1973	1	1004	2	1941	0	0	1	32
SSC_000750	SSC_000750-T1	3737	3	1526	2	2211	3	1413	1	47	1	66
SSC_000751	SSC_000751-T1	992	2	753	1	239	1	465	2	142	1	146
SSC_000752	SSC_000752-T1	393	1	393	0	0	1	393	0	0	0	0
SSC_000753	SSC_000753-T1	3032	4	2254	3	778	2	1347	2	100	2	807
SSC_000754	SSC_000754-T1	2661	4	1904	3	757	3	1653	2	104	1	147
SSC_000755	SSC_000755-T1	1604	3	1374	2	230	3	1356	0	0	1	18
SSC_000756	SSC_000756-T1	5602	7	1468	6	4134	7	1008	1	91	1	369
SSC_000757	SSC_000757-T1	3279	7	1186	6	2093	7	954	1	15	1	217
SSC_000758	SSC_000758-T1	7870	9	1685	8	6185	8	918	2	210	1	557
SSC_000759	SSC_000759-T1	3377	7	1659	6	1718	7	1383	1	176	1	100
SSC_000760	SSC_000760-T1	2148	4	1617	3	531	4	1179	1	133	1	305
SSC_000761	SSC_000761-T1	2405	6	1312	5	1093	6	849	1	12	1	451
SSC_000762	SSC_000762-T1	1779	2	732	1	1047	2	654	1	78	0	0
SSC_000763	SSC_000763-T1	2714	2	2292	1	422	2	1614	0	0	1	678
SSC_000765	SSC_000765-T1	324	1	324	0	0	1	324	0	0	0	0
SSC_000766	SSC_000766-T1	7913	10	4843	9	3070	9	4476	2	367	0	0
SSC_000768	SSC_000768-T1	2925	1	2925	0	0	1	2859	0	0	1	66
SSC_000769	SSC_000769-T1	1605	1	1605	0	0	1	1605	0	0	0	0
SSC_000770	SSC_000770-T1	8183	18	2174	17	6009	18	1944	0	0	1	230
SSC_000771	SSC_000771-T1	672	2	573	1	99	2	573	0	0	0	0
SSC_000772	SSC_000772-T1	2061	4	1515	3	546	4	1515	0	0	0	0
SSC_000773	SSC_000773-T1	1663	4	1202	3	461	4	912	1	99	1	191
SSC_000774	SSC_000774-T1	3024	5	1233	4	1791	5	612	1	352	1	269
SSC_000775	SSC_000775-T1	1319	1	1319	0	0	1	1146	1	7	1	166
SSC_000778	SSC_000778-T1	2977	8	1274	7	1703	8	927	1	173	1	174
SSC_000779	SSC_000779-T1	3517	6	1268	5	2249	6	822	1	247	1	199
SSC_000780	SSC_000780-T1	2780	9	1256	8	1524	9	1194	0	0	1	62
SSC_000781	SSC_000781-T1	1980	5	1473	4	507	5	1473	0	0	0	0
SSC_000782	SSC_000782-T1	3006	6	892	5	2114	6	729	1	112	1	51
SSC_000783	SSC_000783-T1	3599	6	913	5	2686	6	726	1	24	1	163
SSC_000784	SSC_000784-T1	3406	12	1905	11	1501	12	1905	0	0	0	0
SSC_000786	SSC_000786-T1	996	1	996	0	0	1	996	0	0	0	0
SSC_000788	SSC_000788-T1	2122	3	974	2	1148	3	519	1	118	1	337
SSC_000789	SSC_000789-T1	948	1	948	0	0	1	948	0	0	0	0
SSC_000790	SSC_000790-T1	7111	22	2984	21	4127	22	2607	1	151	1	226
SSC_000791	SSC_000791-T1	1925	2	1344	1	581	2	1128	1	10	1	206
SSC_000792	SSC_000792-T1	2943	5	1561	4	1382	5	1095	1	210	1	256
SSC_000793	SSC_000793-T1	1086	1	1086	0	0	1	702	1	134	1	250
SSC_000794	SSC_000794-T1	3923	12	1809	11	2114	12	1422	1	173	1	214
SSC_000795	SSC_000795-T1	4391	12	1917	11	2474	11	1476	2	131	1	310
SSC_000796	SSC_000796-T1	2165	2	2049	1	116	2	2049	0	0	0	0
SSC_000797	SSC_000797-T1	4846	3	1515	2	3331	3	1101	1	324	1	90
SSC_000798	SSC_000798-T1	488	2	414	1	74	2	414	0	0	0	0
SSC_000799	SSC_000799-T1	2286	3	1277	2	1009	3	870	1	206	1	201
SSC_000800	SSC_000800-T1	4201	11	2241	10	1960	11	1884	1	18	1	339
SSC_000801	SSC_000801-T1	3433	10	1429	9	2004	10	1146	0	0	1	283
SSC_000802	SSC_000802-T1	1764	5	1020	4	744	5	903	1	14	1	103
SSC_000803	SSC_000803-T1	3690	6	1708	5	1982	6	1176	1	140	1	392
SSC_000804	SSC_000804-T1	2043	1	2043	0	0	1	2043	0	0	0	0
SSC_000805	SSC_000805-T1	5875	10	1851	9	4024	10	1623	1	99	1	129
SSC_000807	SSC_000807-T1	846	1	846	0	0	1	846	0	0	0	0
SSC_000808	SSC_000808-T1	1565	4	1230	3	335	4	1230	0	0	0	0
SSC_000809	SSC_000809-T1	912	3	745	2	167	3	552	1	108	1	85
SSC_000811	SSC_000811-T1	1008	1	1008	0	0	1	1008	0	0	0	0
SSC_000812	SSC_000812-T1	3006	4	2378	3	628	4	1953	1	117	1	308
SSC_000813	SSC_000813-T1	3034	6	555	5	2479	6	555	0	0	0	0
SSC_000815	SSC_000815-T1	1870	2	1086	1	784	2	267	1	403	1	416
SSC_000816	SSC_000816-T1	748	2	654	1	94	2	654	0	0	0	0
SSC_000817	SSC_000817-T1	1926	7	1175	6	751	7	1041	0	0	1	134
SSC_000818	SSC_000818-T1	4566	9	1720	8	2846	9	1680	1	40	0	0
SSC_000819	SSC_000819-T1	3320	8	1159	7	2161	8	636	1	139	1	384
SSC_000820	SSC_000820-T1	4316	14	1928	13	2388	13	1449	2	214	1	265
SSC_000821	SSC_000821-T1	1778	3	1233	2	545	3	600	1	189	1	444
SSC_000823	SSC_000823-T1	2113	5	854	4	1259	5	609	1	74	1	171
SSC_000824	SSC_000824-T1	3881	8	1763	7	2118	8	1419	0	0	1	344
SSC_000825	SSC_000825-T1	897	4	575	3	322	4	354	1	56	1	165
SSC_000826	SSC_000826-T1	3349	10	1582	9	1767	10	1347	1	30	1	205
SSC_000827	SSC_000827-T1	2839	2	1599	2	1240	2	651	1	55	1	893
SSC_000829	SSC_000829-T1	1237	2	805	1	432	2	300	1	1	1	504
SSC_000830	SSC_000830-T1	6526	4	1896	3	4630	4	1896	0	0	0	0
SSC_000831	SSC_000831-T1	907	1	907	0	0	1	690	1	61	1	156
SSC_000833	SSC_000833-T1	3202	5	1618	4	1584	5	1314	1	77	1	227
SSC_000834	SSC_000834-T1	4397	15	1988	14	2409	15	1545	0	0	1	443
SSC_000835	SSC_000835-T1	3138	3	1823	2	1315	3	1242	1	111	1	470
SSC_000836	SSC_000836-T1	3739	4	2296	3	1443	4	1563	1	257	1	476
SSC_000837	SSC_000837-T1	2391	4	1940	3	451	4	1533	1	74	1	333
SSC_000838	SSC_000838-T1	2095	4	1536	3	559	4	1536	0	0	0	0
SSC_000839	SSC_000839-T1	4015	9	1634	8	2381	8	1026	1	134	2	474
SSC_000840	SSC_000840-T1	436	2	357	1	79	2	357	0	0	0	0
SSC_000841	SSC_000841-T1	2627	1	2627	0	0	1	2424	0	0	1	203
SSC_000842	SSC_000842-T1	1151	3	723	2	428	3	723	0	0	0	0
SSC_000844	SSC_000844-T1	651	1	651	0	0	1	651	0	0	0	0
SSC_000845	SSC_000845-T1	6939	13	4512	12	2427	13	4512	0	0	0	0
SSC_000846	SSC_000846-T1	5357	11	2494	10	2863	11	1875	1	321	1	298
SSC_000847	SSC_000847-T1	1041	2	707	1	334	2	417	1	72	1	218
SSC_000848	SSC_000848-T1	2102	2	1485	1	617	2	1485	0	0	0	0
SSC_000849	SSC_000849-T1	2023	4	1290	3	733	4	1290	0	0	0	0
SSC_000850	SSC_000850-T1	4113	5	1641	4	2472	5	1641	0	0	0	0
SSC_000854	SSC_000854-T1	1716	1	1716	0	0	1	1716	0	0	0	0
SSC_000855	SSC_000855-T1	1907	3	1710	2	197	3	1710	0	0	0	0
SSC_000856	SSC_000856-T1	3327	2	1853	1	1474	2	1515	1	111	1	227
SSC_000857	SSC_000857-T1	2806	2	1465	1	1341	2	1083	1	98	1	284
SSC_000858	SSC_000858-T1	5756	10	2103	9	3653	10	1602	1	195	1	306
SSC_000859	SSC_000859-T1	3026	3	1585	2	1441	2	765	2	372	1	448
SSC_000860	SSC_000860-T1	2800	6	1128	5	1672	6	573	1	134	1	421
SSC_000861	SSC_000861-T1	2414	8	1126	7	1288	8	690	1	44	1	392
SSC_000862	SSC_000862-T1	5068	15	1664	14	3404	15	1272	1	70	1	322
SSC_000864	SSC_000864-T1	1292	2	1206	1	86	2	927	1	279	0	0
SSC_000866	SSC_000866-T1	3026	7	1008	6	2018	7	621	1	179	1	208
SSC_000867	SSC_000867-T1	3186	9	917	8	2269	9	705	0	0	1	212
SSC_000868	SSC_000868-T1	4075	7	2166	6	1909	7	1926	1	4	1	236
SSC_000869	SSC_000869-T1	1356	3	774	2	582	3	564	1	57	1	153
SSC_000871	SSC_000871-T1	3156	3	2784	2	372	3	2784	0	0	0	0
SSC_000873	SSC_000873-T1	2749	4	1277	3	1472	4	666	1	162	1	449
SSC_000874	SSC_000874-T1	3319	9	1805	8	1514	9	1476	0	0	1	329
SSC_000875	SSC_000875-T1	6448	10	2234	9	4214	8	1770	2	181	2	283
SSC_000878	SSC_000878-T1	4049	8	1631	7	2418	7	1080	2	257	1	294
SSC_000879	SSC_000879-T1	3863	12	1380	11	2483	12	942	1	107	1	331
SSC_000880	SSC_000880-T1	5192	15	1686	14	3506	15	1488	1	47	1	151
SSC_000881	SSC_000881-T1	1641	4	937	3	704	4	459	1	96	1	382
SSC_000882	SSC_000882-T1	2015	5	1256	4	759	5	972	0	0	1	284
SSC_000883	SSC_000883-T1	3332	3	1167	2	2165	3	624	1	98	1	445
SSC_000885	SSC_000885-T1	1982	2	857	1	1125	2	573	1	39	1	245
SSC_000888	SSC_000888-T1	3168	6	1575	5	1593	6	1575	0	0	0	0
SSC_000890	SSC_000890-T1	3029	2	2244	1	785	1	1131	1	621	2	492
SSC_000891	SSC_000891-T1	6704	10	1662	9	5042	10	1662	0	0	0	0
SSC_000892	SSC_000892-T1	4448	5	2050	4	2398	5	1293	1	323	1	434
SSC_000894	SSC_000894-T1	2756	3	1888	2	868	3	1428	1	241	1	219
SSC_000895	SSC_000895-T1	5455	7	1866	6	3589	7	1089	1	426	1	351
SSC_000896	SSC_000896-T1	3080	4	636	4	2444	4	429	0	0	1	31
SSC_000897	SSC_000897-T1	3257	2	2431	1	826	2	1980	1	261	1	190
SSC_000898	SSC_000898-T1	4236	6	1316	5	2920	6	1005	1	65	1	246
SSC_000899	SSC_000899-T1	1063	2	642	1	421	2	642	0	0	0	0
SSC_000900	SSC_000900-T1	2000	3	1196	2	804	2	699	2	95	1	402
SSC_000901	SSC_000901-T1	2250	3	1581	2	669	3	1482	0	0	1	99
SSC_000902	SSC_000902-T1	1230	2	978	1	252	2	978	0	0	0	0
SSC_000903	SSC_000903-T1	1877	2	1557	1	320	2	1557	0	0	0	0
SSC_000904	SSC_000904-T1	1908	2	1675	1	233	2	1560	0	0	1	115
SSC_000905	SSC_000905-T1	1848	2	1593	1	255	2	1548	0	0	1	45
SSC_000906	SSC_000906-T1	2037	2	1698	1	339	2	1311	1	214	1	173
SSC_000907	SSC_000907-T1	636	2	545	1	91	2	276	1	210	1	59
SSC_000908	SSC_000908-T1	1006	2	867	1	139	2	867	0	0	0	0
SSC_000909	SSC_000909-T1	1005	1	1005	0	0	1	1005	0	0	0	0
SSC_000910	SSC_000910-T1	1460	1	1460	0	0	1	1047	1	101	1	312
SSC_000911	SSC_000911-T1	3888	10	1578	9	2310	10	1413	1	165	0	0
SSC_000912	SSC_000912-T1	1353	4	1068	3	285	4	1068	0	0	0	0
SSC_000913	SSC_000913-T1	1597	6	829	5	768	6	708	0	0	1	121
SSC_000914	SSC_000914-T1	1922	3	836	2	1086	2	495	2	142	1	199
SSC_000915	SSC_000915-T1	2758	3	1270	2	1488	3	1062	0	0	1	208
SSC_000917	SSC_000917-T1	1988	1	1988	0	0	1	1722	0	0	1	266
SSC_000918	SSC_000918-T1	2004	7	1229	6	775	7	990	1	44	1	195
SSC_000919	SSC_000919-T1	1852	6	1420	5	432	6	1047	1	134	1	239
SSC_000920	SSC_000920-T1	838	1	838	0	0	1	606	1	31	1	201
SSC_000921	SSC_000921-T1	1921	7	1053	6	868	7	759	1	62	1	232
SSC_000922	SSC_000922-T1	2541	7	1211	6	1330	7	927	1	15	1	269
SSC_000923	SSC_000923-T1	3228	3	1390	2	1838	3	882	1	278	1	230
SSC_000924	SSC_000924-T1	1546	2	653	1	893	2	522	0	0	1	131
SSC_000925	SSC_000925-T1	5164	2	1789	1	3375	1	1152	2	108	1	529
SSC_000926	SSC_000926-T1	648	1	648	0	0	1	531	1	47	1	70
SSC_000928	SSC_000928-T1	4407	15	1715	14	2692	14	1323	1	91	2	301
SSC_000930	SSC_000930-T1	2491	5	1572	4	919	4	1134	2	122	1	316
SSC_000931	SSC_000931-T1	2573	7	1121	6	1452	6	774	1	116	2	231
SSC_000932	SSC_000932-T1	2719	8	1409	7	1310	7	849	1	131	2	429
SSC_000933	SSC_000933-T1	3166	10	1518	9	1648	10	1134	1	272	1	112
SSC_000934	SSC_000934-T1	1752	2	1611	1	141	2	1611	0	0	0	0
SSC_000935	SSC_000935-T1	1268	2	1182	1	86	2	1152	0	0	1	30
SSC_000936	SSC_000936-T1	1465	3	1289	2	176	3	987	1	34	1	268
SSC_000937	SSC_000937-T1	582	1	582	0	0	1	582	0	0	0	0
SSC_000938	SSC_000938-T1	1692	4	1395	3	297	4	960	1	177	1	258
SSC_000939	SSC_000939-T1	3029	5	2441	4	588	5	1833	1	152	1	456
SSC_000941	SSC_000941-T1	1538	4	1154	3	384	4	603	1	401	1	150
SSC_000942	SSC_000942-T1	1017	3	651	2	366	3	651	0	0	0	0
SSC_000943	SSC_000943-T1	2050	6	1005	5	1045	6	795	1	56	1	154
SSC_000944	SSC_000944-T1	3229	4	1315	3	1914	3	930	2	177	1	208
SSC_000945	SSC_000945-T1	1830	6	1068	5	762	6	1068	0	0	0	0
SSC_000947	SSC_000947-T1	1993	2	1165	1	828	2	816	1	141	1	208
SSC_000949	SSC_000949-T1	11875	23	3262	22	8613	22	2913	2	349	0	0
SSC_000950	SSC_000950-T1	4508	11	2208	10	2300	11	2208	0	0	0	0
SSC_000951	SSC_000951-T1	840	1	840	0	0	1	840	0	0	0	0
SSC_000952	SSC_000952-T1	3738	2	642	1	3096	2	642	0	0	0	0
SSC_000953	SSC_000953-T1	985	2	845	1	140	2	783	1	62	0	0
SSC_000954	SSC_000954-T1	699	1	699	0	0	1	573	1	31	1	95
SSC_000955	SSC_000955-T1	1271	2	837	1	434	2	837	0	0	0	0
SSC_000956	SSC_000956-T1	573	1	573	0	0	1	573	0	0	0	0
SSC_000957	SSC_000957-T1	576	1	576	0	0	1	576	0	0	0	0
SSC_000958	SSC_000958-T1	588	1	588	0	0	1	483	1	55	1	50
SSC_000959	SSC_000959-T1	684	1	684	0	0	1	684	0	0	0	0
SSC_000960	SSC_000960-T1	672	1	672	0	0	1	672	0	0	0	0
SSC_000961	SSC_000961-T1	1863	2	1782	1	81	2	1782	0	0	0	0
SSC_000962	SSC_000962-T1	787	2	691	1	96	2	438	1	43	1	210
SSC_000963	SSC_000963-T1	1556	2	1440	1	116	2	1440	0	0	0	0
SSC_000964	SSC_000964-T1	2322	2	2208	1	114	2	1074	1	244	1	890
SSC_000965	SSC_000965-T1	3246	3	2265	2	981	2	1539	1	62	2	664
SSC_000966	SSC_000966-T1	5130	10	2099	9	3031	9	1464	2	235	1	400
SSC_000967	SSC_000967-T1	1185	1	1185	0	0	1	1185	0	0	0	0
SSC_000968	SSC_000968-T1	2023	7	1339	6	684	7	1260	0	0	1	79
SSC_000969	SSC_000969-T1	2287	1	2287	0	0	1	1182	1	811	1	294
SSC_000970	SSC_000970-T1	3257	18	1732	17	1525	18	1401	1	52	1	279
SSC_000971	SSC_000971-T1	2358	3	2183	2	175	3	1731	1	135	1	317
SSC_000972	SSC_000972-T1	2047	3	1861	2	186	3	1350	1	15	1	496
SSC_000973	SSC_000973-T1	2730	4	1620	3	1110	4	1479	1	139	1	2
SSC_000975	SSC_000975-T1	1658	4	1036	3	622	4	609	0	0	1	427
SSC_000976	SSC_000976-T1	1915	6	1260	5	655	6	963	1	77	1	220
SSC_000977	SSC_000977-T1	1704	2	1683	1	21	2	1464	0	0	1	219
SSC_000978	SSC_000978-T1	6150	7	1944	6	4206	6	975	2	643	1	326
SSC_000981	SSC_000981-T1	4086	12	1778	11	2308	12	1386	1	92	1	300
SSC_000983	SSC_000983-T1	8455	4	1775	3	6680	4	1233	1	292	1	250
SSC_000985	SSC_000985-T1	2582	3	526	2	2056	3	282	1	53	1	191
SSC_000986	SSC_000986-T1	2447	5	1020	4	1427	5	1020	0	0	0	0
SSC_000990	SSC_000990-T1	2361	2	1485	1	876	2	1038	1	42	1	405
SSC_000994	SSC_000994-T1	1267	3	1053	2	214	3	1053	0	0	0	0
SSC_000996	SSC_000996-T1	1850	4	1617	3	233	4	1617	0	0	0	0
SSC_000999	SSC_000999-T1	1248	2	735	1	513	1	390	1	108	2	237
SSC_001001	SSC_001001-T1	4749	11	1565	10	3184	10	1056	2	220	1	289
SSC_001002	SSC_001002-T1	965	2	483	1	482	2	483	0	0	0	0
SSC_001004	SSC_001004-T1	2782	2	1703	1	1079	2	1476	1	68	1	159
SSC_001010	SSC_001010-T1	1304	6	747	5	557	6	747	0	0	0	0
SSC_001011	SSC_001011-T1	3691	2	1751	1	1940	2	1470	1	138	1	143
SSC_001013	SSC_001013-T1	2274	2	1470	1	804	2	1470	0	0	0	0
SSC_001017	SSC_001017-T1	3040	2	1488	1	1552	2	1488	0	0	0	0
SSC_001018	SSC_001018-T1	3750	6	1076	5	2674	6	699	1	98	1	279
SSC_001019	SSC_001019-T1	894	1	894	0	0	1	894	0	0	0	0
SSC_001020	SSC_001020-T1	6536	4	1916	3	4620	4	1572	1	191	1	153
SSC_001021	SSC_001021-T1	3354	4	724	3	2630	4	309	1	198	1	217
SSC_001024	SSC_001024-T1	14465	22	4155	21	10310	22	4155	0	0	0	0
SSC_001026	SSC_001026-T1	1874	2	1317	1	557	2	1317	0	0	0	0
SSC_001027	SSC_001027-T1	2248	1	2248	0	0	1	2088	1	39	1	121
SSC_001028	SSC_001028-T1	9290	3	1725	2	7565	3	1725	0	0	0	0
SSC_001029	SSC_001029-T1	1357	1	1357	0	0	1	651	1	103	1	603
SSC_001031	SSC_001031-T1	405	1	405	0	0	1	405	0	0	0	0
SSC_001032	SSC_001032-T1	3088	5	1806	4	1282	5	1512	1	76	1	218
SSC_001033	SSC_001033-T1	3758	3	2320	2	1438	3	1692	1	7	1	621
SSC_001034	SSC_001034-T1	4106	8	1008	7	3098	8	1008	0	0	0	0
SSC_001035	SSC_001035-T1	418	2	330	1	88	2	330	0	0	0	0
SSC_001037	SSC_001037-T1	2531	4	996	3	1535	4	996	0	0	0	0
SSC_001038	SSC_001038-T1	300	1	300	0	0	1	300	0	0	0	0
SSC_001041	SSC_001041-T1	3401	5	836	4	2565	5	468	1	107	1	261
SSC_001042	SSC_001042-T1	2677	3	903	2	1774	3	432	1	187	1	284
SSC_001043	SSC_001043-T1	3952	10	2233	9	1719	9	1737	2	169	1	327
SSC_001045	SSC_001045-T1	2424	2	2268	1	156	2	2268	0	0	0	0
SSC_001047	SSC_001047-T1	6231	8	1882	7	4349	8	1602	1	114	1	166
SSC_001048	SSC_001048-T1	3660	7	1073	6	2587	7	942	0	0	1	131
SSC_001052	SSC_001052-T1	3456	6	1144	5	2312	6	546	1	118	1	480
SSC_001055	SSC_001055-T1	1101	2	888	1	213	2	888	0	0	0	0
SSC_001056	SSC_001056-T1	1198	3	1011	2	187	3	1011	0	0	0	0
SSC_001057	SSC_001057-T1	2592	4	1293	3	1299	4	1293	0	0	0	0
SSC_001058	SSC_001058-T1	1516	1	1516	0	0	1	1491	0	0	1	25
SSC_001063	SSC_001063-T1	1555	1	1555	0	0	1	1431	1	56	1	68
SSC_001064	SSC_001064-T1	2519	2	2080	1	439	2	1518	1	88	1	474
SSC_001065	SSC_001065-T1	1955	2	937	1	1018	2	522	0	0	1	415
SSC_001066	SSC_001066-T1	1467	1	1467	0	0	1	1467	0	0	0	0
SSC_001067	SSC_001067-T1	5219	14	1533	13	3686	13	1377	0	0	2	156
SSC_001068	SSC_001068-T1	2276	5	1042	4	1234	5	933	1	109	0	0
SSC_001071	SSC_001071-T1	557	1	557	0	0	1	321	1	81	1	155
SSC_001072	SSC_001072-T1	745	1	745	0	0	1	318	1	52	1	375
SSC_001073	SSC_001073-T1	1956	4	1144	3	812	4	624	1	184	1	336
SSC_001075	SSC_001075-T1	3344	10	1895	9	1449	10	1734	1	44	1	117
SSC_001076	SSC_001076-T1	3231	2	2283	1	948	1	945	2	923	1	415
SSC_001077	SSC_001077-T1	2543	6	1943	5	600	6	1659	1	100	1	184
SSC_001079	SSC_001079-T1	1842	2	1644	1	198	2	687	1	109	1	848
SSC_001080	SSC_001080-T1	3497	5	2565	4	932	4	1305	1	118	2	1142
SSC_001081	SSC_001081-T1	2454	3	1191	2	1263	3	732	1	387	1	72
SSC_001082	SSC_001082-T1	5721	6	2211	5	3510	6	2211	0	0	0	0
SSC_001083	SSC_001083-T1	2321	11	792	10	1529	11	792	0	0	0	0
SSC_001084	SSC_001084-T1	1670	6	1074	5	596	6	1074	0	0	0	0
SSC_001085	SSC_001085-T1	3201	4	1815	3	1386	4	1146	1	85	1	584
SSC_001088	SSC_001088-T1	1514	3	849	2	665	3	849	0	0	0	0
SSC_001089	SSC_001089-T1	3821	2	687	1	3134	2	687	0	0	0	0
SSC_001090	SSC_001090-T1	1431	2	1002	1	429	2	1002	0	0	0	0
SSC_001091	SSC_001091-T1	1511	2	660	1	851	2	660	0	0	0	0
SSC_001092	SSC_001092-T1	950	4	219	3	731	4	219	0	0	0	0
SSC_001093	SSC_001093-T1	369	1	369	0	0	1	369	0	0	0	0
SSC_001094	SSC_001094-T1	2644	5	1682	4	962	5	1182	1	221	1	279
SSC_001095	SSC_001095-T1	510	1	510	0	0	1	510	0	0	0	0
SSC_001097	SSC_001097-T1	4198	5	2271	4	1927	5	963	1	673	1	635
SSC_001098	SSC_001098-T1	8926	23	4008	22	4918	22	3552	2	216	1	240
SSC_001101	SSC_001101-T1	480	2	357	1	123	2	357	0	0	0	0
SSC_001103	SSC_001103-T1	2007	6	1556	5	451	6	1488	1	2	1	66
SSC_001104	SSC_001104-T1	1818	2	1788	1	30	2	1221	0	0	1	567
SSC_001105	SSC_001105-T1	1765	2	1674	1	91	2	1617	1	37	1	20
SSC_001106	SSC_001106-T1	1317	3	906	2	411	3	906	0	0	0	0
SSC_001107	SSC_001107-T1	2594	4	1367	3	1227	4	789	1	135	1	443
SSC_001109	SSC_001109-T1	2131	2	1977	1	154	1	1194	2	783	0	0
SSC_001111	SSC_001111-T1	2065	2	1671	1	394	2	1488	1	44	1	139
SSC_001112	SSC_001112-T1	2209	2	1105	1	1104	1	714	2	178	1	213
SSC_001113	SSC_001113-T1	974	3	516	2	458	3	516	0	0	0	0
SSC_001114	SSC_001114-T1	3381	3	1944	2	1437	3	1569	1	119	1	256
SSC_001115	SSC_001115-T1	11490	24	2714	23	8776	23	2211	1	134	2	369
SSC_001119	SSC_001119-T1	3580	8	1887	7	1693	8	1887	0	0	0	0
SSC_001120	SSC_001120-T1	2064	1	2064	0	0	1	2064	0	0	0	0
SSC_001121	SSC_001121-T1	1079	1	1079	0	0	1	888	1	3	1	188
SSC_001123	SSC_001123-T1	1878	3	1201	2	677	3	948	1	47	1	206
SSC_001124	SSC_001124-T1	1933	3	609	2	1324	3	609	0	0	0	0
SSC_001125	SSC_001125-T1	2764	4	657	3	2107	4	657	0	0	0	0
SSC_001129	SSC_001129-T1	929	3	597	2	332	3	597	0	0	0	0
SSC_001132	SSC_001132-T1	987	2	645	1	342	2	645	0	0	0	0
SSC_001134	SSC_001134-T1	6646	14	2115	13	4531	14	1731	1	46	1	338
SSC_001135	SSC_001135-T1	2712	3	2252	2	460	2	1344	2	504	1	404
SSC_001136	SSC_001136-T1	4739	6	810	5	3929	6	810	0	0	0	0
SSC_001138	SSC_001138-T1	1084	5	693	4	391	5	693	0	0	0	0
SSC_001139	SSC_001139-T1	1420	4	1064	3	356	4	549	1	211	1	304
SSC_001140	SSC_001140-T1	1879	5	1113	4	766	5	1113	0	0	0	0
SSC_001142	SSC_001142-T1	1256	1	1256	0	0	1	534	1	139	1	583
SSC_001143	SSC_001143-T1	4353	7	1179	6	3174	7	1179	0	0	0	0
SSC_001144	SSC_001144-T1	3105	5	2474	4	631	5	2139	1	335	0	0
SSC_001145	SSC_001145-T1	5320	3	666	3	4654	3	600	1	18	1	48
SSC_001148	SSC_001148-T1	801	3	516	2	285	3	516	0	0	0	0
SSC_001149	SSC_001149-T1	703	4	333	3	370	4	333	0	0	0	0
SSC_001150	SSC_001150-T1	2127	3	1152	2	975	3	1152	0	0	0	0
SSC_001151	SSC_001151-T1	3790	5	1212	4	2578	5	1212	0	0	0	0
SSC_001155	SSC_001155-T1	1263	1	1263	0	0	1	1263	0	0	0	0
SSC_001159	SSC_001159-T1	411	1	411	0	0	1	411	0	0	0	0
SSC_001160	SSC_001160-T1	1613	1	1613	0	0	1	1038	1	232	1	343
SSC_001161	SSC_001161-T1	2106	2	965	1	1141	2	558	1	69	1	338
SSC_001162	SSC_001162-T1	2838	4	845	3	1993	4	363	1	72	1	410
SSC_001163	SSC_001163-T1	7441	17	4492	16	2949	17	3600	0	0	1	892
SSC_001164	SSC_001164-T1	3569	9	1493	8	2076	9	717	1	287	1	489
SSC_001166	SSC_001166-T1	1581	1	1581	0	0	1	1581	0	0	0	0
SSC_001167	SSC_001167-T1	603	1	603	0	0	1	603	0	0	0	0
SSC_001168	SSC_001168-T1	651	1	651	0	0	1	651	0	0	0	0
SSC_001169	SSC_001169-T1	3043	2	1307	1	1736	2	870	1	391	1	46
SSC_001176	SSC_001176-T1	612	1	612	0	0	1	612	0	0	0	0
SSC_001177	SSC_001177-T1	1175	2	1068	1	107	2	1068	0	0	0	0
SSC_001179	SSC_001179-T1	2934	6	1524	5	1410	6	1524	0	0	0	0
SSC_001180	SSC_001180-T1	2351	2	1774	1	577	2	1611	0	0	1	163
SSC_001181	SSC_001181-T1	1591	2	1154	1	437	2	1110	1	19	1	25
SSC_001182	SSC_001182-T1	1450	2	1377	1	73	2	1377	0	0	0	0
SSC_001185	SSC_001185-T1	4686	7	953	6	3733	7	630	1	206	1	117
SSC_001186	SSC_001186-T1	6660	5	2008	4	4652	5	1962	0	0	1	46
SSC_001187	SSC_001187-T1	5860	13	1921	12	3939	11	1167	3	457	1	297
SSC_001189	SSC_001189-T1	3745	3	2599	2	1146	3	1257	1	300	1	1042
SSC_001191	SSC_001191-T1	653	2	540	1	113	2	540	0	0	0	0
SSC_001192	SSC_001192-T1	3263	8	1458	7	1805	8	1068	1	77	1	313
SSC_001194	SSC_001194-T1	4114	14	2077	13	2037	14	1929	0	0	1	148
SSC_001195	SSC_001195-T1	7659	15	1853	14	5806	14	1554	0	0	2	299
SSC_001197	SSC_001197-T1	3752	8	2495	7	1257	8	1995	1	270	1	230
SSC_001198	SSC_001198-T1	2409	5	1122	4	1287	5	657	1	74	1	391
SSC_001199	SSC_001199-T1	5599	5	2567	4	3032	5	2100	1	397	1	70
SSC_001200	SSC_001200-T1	1372	1	1372	0	0	1	921	1	226	1	225
SSC_001201	SSC_001201-T1	1781	2	1572	1	209	2	1092	1	100	1	380
SSC_001202	SSC_001202-T1	3722	8	1318	7	2404	8	846	1	234	1	238
SSC_001206	SSC_001206-T1	930	1	930	0	0	1	744	1	35	1	151
SSC_001207	SSC_001207-T1	3487	5	2406	4	1081	5	2406	0	0	0	0
SSC_001209	SSC_001209-T1	12783	19	2325	18	10458	19	1869	1	120	1	336
SSC_001210	SSC_001210-T1	6422	15	2390	14	4032	15	1917	1	177	1	296
SSC_001212	SSC_001212-T1	4820	9	1399	8	3421	8	630	2	340	1	429
SSC_001213	SSC_001213-T1	7253	13	2136	12	5117	12	1620	1	149	2	367
SSC_001214	SSC_001214-T1	3677	6	1032	5	2645	6	1032	0	0	0	0
SSC_001215	SSC_001215-T1	3348	4	741	3	2607	4	741	0	0	0	0
SSC_001216	SSC_001216-T1	4307	6	1014	5	3293	6	1014	0	0	0	0
SSC_001217	SSC_001217-T1	8146	5	1122	4	7024	5	1122	0	0	0	0
SSC_001219	SSC_001219-T1	2380	5	958	4	1422	5	657	1	39	1	262
SSC_001220	SSC_001220-T1	6652	11	4233	10	2419	11	4233	0	0	0	0
SSC_001221	SSC_001221-T1	4485	9	1684	8	2801	9	1236	1	57	1	391
SSC_001222	SSC_001222-T1	3173	5	836	4	2337	5	516	1	54	1	266
SSC_001224	SSC_001224-T1	3363	6	1068	5	2295	6	1068	0	0	0	0
SSC_001225	SSC_001225-T1	3614	8	1540	7	2074	8	957	1	102	1	481
SSC_001227	SSC_001227-T1	6272	11	3222	10	3050	11	3222	0	0	0	0
SSC_001228	SSC_001228-T1	5144	3	2157	2	2987	3	1674	1	185	1	298
SSC_001230	SSC_001230-T1	1149	1	1149	0	0	1	993	0	0	1	156
SSC_001231	SSC_001231-T1	1146	1	1146	0	0	1	1146	0	0	0	0
SSC_001233	SSC_001233-T1	954	1	954	0	0	1	954	0	0	0	0
SSC_001234	SSC_001234-T1	2718	4	1215	3	1503	4	1215	0	0	0	0
SSC_001235	SSC_001235-T1	4780	5	1348	4	3432	5	1032	1	45	1	271
SSC_001236	SSC_001236-T1	3801	5	1255	4	2546	5	1032	0	0	1	223
SSC_001237	SSC_001237-T1	2191	5	1047	4	1144	5	1047	0	0	0	0
SSC_001238	SSC_001238-T1	1112	5	837	4	275	5	837	0	0	0	0
SSC_001239	SSC_001239-T1	2388	5	1293	4	1095	5	1035	0	0	1	258
SSC_001240	SSC_001240-T1	1659	4	996	3	663	4	996	0	0	0	0
SSC_001241	SSC_001241-T1	2176	5	1294	4	882	5	1026	0	0	1	268
SSC_001242	SSC_001242-T1	5220	8	1667	7	3553	8	1602	1	65	0	0
SSC_001243	SSC_001243-T1	2721	5	1041	4	1680	5	1041	0	0	0	0
SSC_001244	SSC_001244-T1	2605	5	1035	4	1570	5	1035	0	0	0	0
SSC_001245	SSC_001245-T1	3328	6	1023	5	2305	6	1023	0	0	0	0
SSC_001247	SSC_001247-T1	4377	5	1189	4	3188	5	1047	1	30	1	112
SSC_001248	SSC_001248-T1	1921	4	764	3	1157	4	507	1	87	1	170
SSC_001249	SSC_001249-T1	1623	4	768	3	855	4	492	1	109	1	167
SSC_001250	SSC_001250-T1	3526	5	804	4	2722	5	369	1	100	1	335
SSC_001251	SSC_001251-T1	3133	8	1101	7	2032	8	1023	1	78	0	0
SSC_001252	SSC_001252-T1	8136	9	4050	8	4086	9	3234	1	384	1	432
SSC_001253	SSC_001253-T1	2979	5	2224	4	755	5	2079	0	0	1	145
SSC_001254	SSC_001254-T1	2321	6	1171	5	1150	6	957	1	91	1	123
SSC_001256	SSC_001256-T1	1197	2	931	1	266	2	825	0	0	1	106
SSC_001257	SSC_001257-T1	3340	10	1474	9	1866	9	870	2	220	1	384
SSC_001258	SSC_001258-T1	1954	2	1365	1	589	2	1365	0	0	0	0
SSC_001259	SSC_001259-T1	6375	21	2694	20	3681	21	2694	0	0	0	0
SSC_001260	SSC_001260-T1	1810	4	1192	3	618	4	987	1	62	1	143
SSC_001263	SSC_001263-T1	1252	2	618	1	634	2	618	0	0	0	0
SSC_001264	SSC_001264-T1	2445	9	1694	8	751	9	1677	1	17	0	0
SSC_001265	SSC_001265-T1	4614	14	1715	13	2899	13	1242	2	182	1	291
SSC_001266	SSC_001266-T1	4607	3	2689	2	1918	3	1692	1	358	1	639
SSC_001268	SSC_001268-T1	5523	15	2553	14	2970	13	1632	1	116	3	805
SSC_001269	SSC_001269-T1	3697	7	1341	6	2356	7	1143	1	84	1	114
SSC_001270	SSC_001270-T1	2394	2	1071	1	1323	1	612	1	51	2	408
SSC_001271	SSC_001271-T1	1036	3	880	2	156	3	525	1	104	1	251
SSC_001272	SSC_001272-T1	4729	5	2687	4	2042	4	2235	2	213	1	239
SSC_001273	SSC_001273-T1	3225	8	2016	7	1209	8	1542	1	119	1	355
SSC_001274	SSC_001274-T1	3185	10	1214	9	1971	10	840	1	153	1	221
SSC_001276	SSC_001276-T1	4157	16	1678	15	2479	16	1140	1	97	1	441
SSC_001277	SSC_001277-T1	5251	17	2409	16	2842	17	2028	0	0	1	381
SSC_001278	SSC_001278-T1	981	3	588	2	393	3	588	0	0	0	0
SSC_001279	SSC_001279-T1	2965	6	1082	5	1883	6	759	1	41	1	282
SSC_001280	SSC_001280-T1	627	1	627	0	0	1	312	1	58	1	257
SSC_001281	SSC_001281-T1	688	1	688	0	0	1	312	1	60	1	316
SSC_001283	SSC_001283-T1	1902	1	1902	0	0	1	1902	0	0	0	0
SSC_001284	SSC_001284-T1	2922	6	1828	5	1094	5	1011	1	287	2	530
SSC_001285	SSC_001285-T1	1231	3	899	2	332	3	516	0	0	1	383
SSC_001286	SSC_001286-T1	1578	1	1578	0	0	1	1578	0	0	0	0
SSC_001287	SSC_001287-T1	2989	3	1385	2	1604	3	834	1	240	1	311
SSC_001288	SSC_001288-T1	4486	7	1360	6	3126	6	834	2	205	1	321
SSC_001290	SSC_001290-T1	1030	1	1030	0	0	1	957	0	0	1	73
SSC_001291	SSC_001291-T1	611	1	611	0	0	1	408	1	72	1	131
SSC_001292	SSC_001292-T1	3507	5	1928	4	1579	5	1638	1	122	1	168
SSC_001293	SSC_001293-T1	3714	5	2253	4	1461	5	1764	0	0	1	489
SSC_001294	SSC_001294-T1	549	1	549	0	0	1	549	0	0	0	0
SSC_001295	SSC_001295-T1	932	3	659	2	273	3	543	0	0	1	116
SSC_001296	SSC_001296-T1	1278	3	1079	2	199	3	885	1	47	1	147
SSC_001297	SSC_001297-T1	1073	3	861	2	212	3	861	0	0	0	0
SSC_001298	SSC_001298-T1	1088	3	837	2	251	3	837	0	0	0	0
SSC_001299	SSC_001299-T1	1447	2	1189	1	258	2	861	1	74	1	254
SSC_001300	SSC_001300-T1	1296	3	1116	2	180	3	855	1	95	1	166
SSC_001301	SSC_001301-T1	3324	9	1755	8	1569	9	1755	0	0	0	0
SSC_001302	SSC_001302-T1	5697	14	2741	13	2956	14	2493	1	45	1	203
SSC_001303	SSC_001303-T1	3105	7	813	6	2292	7	813	0	0	0	0
SSC_001304	SSC_001304-T1	4081	5	2760	4	1321	5	2760	0	0	0	0
SSC_001305	SSC_001305-T1	5659	10	3130	9	2529	10	3102	1	28	0	0
SSC_001306	SSC_001306-T1	1764	3	1428	2	336	3	1137	1	103	1	188
SSC_001307	SSC_001307-T1	1619	2	1451	1	168	2	1368	1	83	0	0
SSC_001308	SSC_001308-T1	908	1	908	0	0	1	540	1	46	1	322
SSC_001309	SSC_001309-T1	633	1	633	0	0	1	633	0	0	0	0
SSC_001310	SSC_001310-T1	2173	3	1956	2	217	3	1956	0	0	0	0
SSC_001311	SSC_001311-T1	3096	13	1847	12	1249	13	1296	1	95	1	456
SSC_001312	SSC_001312-T1	3340	20	1583	19	1757	20	1410	0	0	1	173
SSC_001313	SSC_001313-T1	3481	4	2606	3	875	4	2172	1	128	1	306
SSC_001314	SSC_001314-T1	1916	2	1825	1	91	2	1086	1	130	1	609
SSC_001315	SSC_001315-T1	2526	8	1906	7	620	8	1785	0	0	1	121
SSC_001316	SSC_001316-T1	1422	3	1212	2	210	3	1137	0	0	1	75
SSC_001317	SSC_001317-T1	1043	1	1043	0	0	1	507	1	169	1	367
SSC_001318	SSC_001318-T1	2295	6	846	5	1449	6	267	1	105	1	474
SSC_001319	SSC_001319-T1	1743	4	1461	3	282	4	1461	0	0	0	0
SSC_001320	SSC_001320-T1	4110	10	1695	9	2415	10	864	1	161	1	670
SSC_001321	SSC_001321-T1	1889	7	1149	6	740	7	1149	0	0	0	0
SSC_001322	SSC_001322-T1	3086	2	1401	1	1685	2	1401	0	0	0	0
SSC_001324	SSC_001324-T1	2314	2	798	1	1516	2	798	0	0	0	0
SSC_001325	SSC_001325-T1	974	3	798	2	176	3	798	0	0	0	0
SSC_001326	SSC_001326-T1	3096	10	2259	9	837	10	2259	0	0	0	0
SSC_001327	SSC_001327-T1	872	3	696	2	176	3	696	0	0	0	0
SSC_001329	SSC_001329-T1	573	1	573	0	0	1	573	0	0	0	0
SSC_001331	SSC_001331-T1	4409	5	2925	4	1484	5	2925	0	0	0	0
SSC_001332	SSC_001332-T1	5671	5	2769	4	2902	5	2769	0	0	0	0
SSC_001333	SSC_001333-T1	4749	6	2723	5	2026	6	2682	0	0	1	41
SSC_001334	SSC_001334-T1	4194	13	2858	12	1336	13	2811	0	0	1	47
SSC_001335	SSC_001335-T1	4267	11	2442	10	1825	11	2199	0	0	1	243
SSC_001336	SSC_001336-T1	2061	2	1698	1	363	1	1254	2	190	1	254
SSC_001337	SSC_001337-T1	1971	5	1203	4	768	5	1203	0	0	0	0
SSC_001338	SSC_001338-T1	671	3	411	2	260	3	411	0	0	0	0
SSC_001341	SSC_001341-T1	2082	4	1077	3	1005	4	1077	0	0	0	0
SSC_001344	SSC_001344-T1	2004	3	1479	2	525	3	1479	0	0	0	0
SSC_001347	SSC_001347-T1	3823	3	1617	2	2206	3	1617	0	0	0	0
SSC_001348	SSC_001348-T1	2634	3	2238	2	396	1	1326	1	35	3	877
SSC_001349	SSC_001349-T1	1983	5	1626	4	357	5	1626	0	0	0	0
SSC_001354	SSC_001354-T1	1020	1	1020	0	0	1	777	0	0	1	243
SSC_001356	SSC_001356-T1	4226	10	2406	9	1820	10	2283	0	0	1	123
SSC_001358	SSC_001358-T1	3932	11	2247	10	1685	11	2169	0	0	1	78
SSC_001359	SSC_001359-T1	5040	11	1614	10	3426	11	1530	1	84	0	0
SSC_001360	SSC_001360-T1	4665	6	3438	5	1227	4	2922	0	0	3	516
SSC_001361	SSC_001361-T1	11231	26	5338	25	5893	26	4938	0	0	1	400
SSC_001362	SSC_001362-T1	1857	1	1857	0	0	1	1644	0	0	1	213
SSC_001363	SSC_001363-T1	670	2	594	1	76	2	594	0	0	0	0
SSC_001365	SSC_001365-T1	1426	2	924	1	502	2	924	0	0	0	0
SSC_001366	SSC_001366-T1	1119	1	1119	0	0	1	1119	0	0	0	0
SSC_001367	SSC_001367-T1	1700	6	1227	5	473	6	1227	0	0	0	0
SSC_001369	SSC_001369-T1	2873	3	2727	2	146	3	2727	0	0	0	0
SSC_001370	SSC_001370-T1	1251	2	739	2	512	2	354	1	33	1	352
SSC_001371	SSC_001371-T1	2013	4	1233	3	780	4	1233	0	0	0	0
SSC_001372	SSC_001372-T1	2768	7	1017	6	1751	7	1017	0	0	0	0
SSC_001373	SSC_001373-T1	1130	1	1130	0	0	1	1130	0	0	0	0
SSC_001374	SSC_001374-T1	6979	13	4712	12	2267	13	4383	0	0	1	329
SSC_001376	SSC_001376-T1	584	2	549	1	35	2	549	0	0	0	0
SSC_001377	SSC_001377-T1	7315	13	1821	12	5494	13	1524	1	37	1	260
SSC_001378	SSC_001378-T1	1882	3	1725	2	157	3	1725	0	0	0	0
SSC_001381	SSC_001381-T1	4299	5	1038	4	3261	5	759	1	76	1	203
SSC_001383	SSC_001383-T1	3665	5	1190	4	2475	5	1074	0	0	1	116
SSC_001384	SSC_001384-T1	2691	2	432	1	2259	2	432	0	0	0	0
SSC_001385	SSC_001385-T1	971	5	429	4	542	5	429	0	0	0	0
SSC_001386	SSC_001386-T1	7409	5	2206	4	5203	5	1428	1	218	1	560
SSC_001387	SSC_001387-T1	3927	7	1171	6	2756	7	693	1	163	1	315
SSC_001389	SSC_001389-T1	3234	4	738	3	2496	4	738	0	0	0	0
SSC_001390	SSC_001390-T1	1570	3	1092	2	478	3	1092	0	0	0	0
SSC_001392	SSC_001392-T1	918	1	918	0	0	1	918	0	0	0	0
SSC_001393	SSC_001393-T1	5076	15	2497	14	2579	14	2196	1	3	2	298
SSC_001394	SSC_001394-T1	336	1	336	0	0	1	336	0	0	0	0
SSC_001395	SSC_001395-T1	2197	4	351	3	1846	4	351	0	0	0	0
SSC_001396	SSC_001396-T1	789	2	699	1	90	2	699	0	0	0	0
SSC_001397	SSC_001397-T1	2353	10	804	9	1549	10	804	0	0	0	0
SSC_001401	SSC_001401-T1	3942	8	1483	7	2459	8	726	1	256	1	501
SSC_001402	SSC_001402-T1	2393	2	1368	1	1025	2	741	1	186	1	441
SSC_001404	SSC_001404-T1	5443	15	1422	14	4021	15	1338	1	40	1	44
SSC_001409	SSC_001409-T1	2831	5	881	4	1950	5	558	0	0	1	323
SSC_001410	SSC_001410-T1	3675	7	1262	6	2413	5	678	2	42	2	542
SSC_001414	SSC_001414-T1	2875	6	709	5	2166	5	369	2	125	1	215
SSC_001415	SSC_001415-T1	2678	2	1447	1	1231	2	1050	1	140	1	257
SSC_001416	SSC_001416-T1	2920	4	378	3	2542	4	378	0	0	0	0
SSC_001417	SSC_001417-T1	1574	4	652	3	922	4	321	1	88	1	243
SSC_001418	SSC_001418-T1	2367	4	891	3	1476	4	891	0	0	0	0
SSC_001420	SSC_001420-T1	912	1	912	0	0	1	912	0	0	0	0
SSC_001424	SSC_001424-T1	2486	4	1074	3	1412	4	1074	0	0	0	0
SSC_001425	SSC_001425-T1	755	2	681	1	74	2	681	0	0	0	0
SSC_001429	SSC_001429-T1	5743	7	843	6	4900	7	843	0	0	0	0
SSC_001432	SSC_001432-T1	1227	5	777	4	450	5	777	0	0	0	0
SSC_001433	SSC_001433-T1	681	1	681	0	0	1	432	1	49	1	200
SSC_001437	SSC_001437-T1	2745	3	990	2	1755	3	990	0	0	0	0
SSC_001439	SSC_001439-T1	3004	10	1645	9	1359	10	1401	1	64	1	180
SSC_001440	SSC_001440-T1	1301	2	564	1	737	2	564	0	0	0	0
SSC_001441	SSC_001441-T1	6498	19	2711	18	3787	19	2379	1	332	0	0
SSC_001442	SSC_001442-T1	3242	4	1590	3	1652	4	1014	1	203	1	373
SSC_001443	SSC_001443-T1	4336	13	2528	12	1808	13	2196	0	0	1	332
SSC_001448	SSC_001448-T1	6516	3	1292	2	5224	3	1206	1	86	0	0
SSC_001449	SSC_001449-T1	360	1	360	0	0	1	360	0	0	0	0
SSC_001453	SSC_001453-T1	1182	1	1182	0	0	1	1176	0	0	1	6
SSC_001455	SSC_001455-T1	508	1	508	0	0	1	459	1	49	0	0
SSC_001456	SSC_001456-T1	1230	1	1230	0	0	1	1230	0	0	0	0
SSC_001457	SSC_001457-T1	1507	2	1245	1	262	2	1245	0	0	0	0
SSC_001458	SSC_001458-T1	1392	2	831	1	561	2	831	0	0	0	0
SSC_001461	SSC_001461-T1	1182	2	1095	1	87	2	1095	0	0	0	0
SSC_001462	SSC_001462-T1	4324	3	1611	2	2713	3	1611	0	0	0	0
SSC_001463	SSC_001463-T1	10955	15	3891	14	7064	15	3891	0	0	0	0
SSC_001466	SSC_001466-T1	1318	2	1182	1	136	2	1182	0	0	0	0
SSC_001467	SSC_001467-T1	1330	1	1330	0	0	1	1119	1	211	0	0
SSC_001468	SSC_001468-T1	2005	2	1523	1	482	2	1257	1	70	1	196
SSC_001470	SSC_001470-T1	731	2	636	1	95	2	636	0	0	0	0
SSC_001474	SSC_001474-T1	1419	3	1014	2	405	3	768	1	38	1	208
SSC_001475	SSC_001475-T1	2851	5	1307	4	1544	5	1146	1	72	1	89
SSC_001477	SSC_001477-T1	1369	2	1203	1	166	2	1203	0	0	0	0
SSC_001480	SSC_001480-T1	4694	7	2537	6	2157	7	1974	1	145	1	418
SSC_001481	SSC_001481-T1	1423	1	1423	0	0	1	1221	1	36	1	166
SSC_001482	SSC_001482-T1	1218	1	1218	0	0	1	1218	0	0	0	0
SSC_001483	SSC_001483-T1	1197	1	1197	0	0	1	1197	0	0	0	0
SSC_001487	SSC_001487-T1	1145	5	813	4	332	5	813	0	0	0	0
SSC_001496	SSC_001496-T1	3404	9	1531	8	1873	9	1029	1	176	1	326
SSC_001497	SSC_001497-T1	4702	2	710	2	3992	2	312	1	173	1	225
SSC_001498	SSC_001498-T1	2039	2	1941	1	98	2	1941	0	0	0	0
SSC_001499	SSC_001499-T1	2118	1	2118	0	0	1	2118	0	0	0	0
SSC_001500	SSC_001500-T1	2033	2	1959	1	74	2	1959	0	0	0	0
SSC_001501	SSC_001501-T1	1806	1	1806	0	0	1	1806	0	0	0	0
SSC_001503	SSC_001503-T1	3001	3	1496	2	1505	1	780	3	588	1	128
SSC_001505	SSC_001505-T1	3227	10	1947	9	1280	10	1947	0	0	0	0
SSC_001507	SSC_001507-T1	972	1	972	0	0	1	972	0	0	0	0
SSC_001508	SSC_001508-T1	7771	12	2041	11	5730	12	1731	1	228	1	82
SSC_001509	SSC_001509-T1	1042	2	818	1	224	2	645	0	0	1	173
SSC_001510	SSC_001510-T1	3063	5	2086	4	977	5	1863	1	13	1	210
SSC_001511	SSC_001511-T1	1072	5	729	4	343	5	729	0	0	0	0
SSC_001512	SSC_001512-T1	5311	4	3513	3	1798	4	3513	0	0	0	0
SSC_001513	SSC_001513-T1	1377	1	1377	0	0	1	1377	0	0	0	0
SSC_001514	SSC_001514-T1	1544	1	1544	0	0	1	1383	1	40	1	121
SSC_001515	SSC_001515-T1	2741	3	1587	2	1154	3	1587	0	0	0	0
SSC_001516	SSC_001516-T1	3306	1	3306	0	0	1	3306	0	0	0	0
SSC_001532	SSC_001532-T1	6958	19	3039	18	3919	19	2448	1	116	1	475
SSC_001533	SSC_001533-T1	3628	5	810	4	2818	3	174	2	376	2	260
SSC_001535	SSC_001535-T1	5705	4	1988	3	3717	4	1872	1	8	1	108
SSC_001536	SSC_001536-T1	4349	4	1888	3	2461	4	1695	0	0	1	193
SSC_001537	SSC_001537-T1	3585	2	3471	1	114	1	3321	0	0	2	150
SSC_001538	SSC_001538-T1	3348	1	3348	0	0	1	3348	0	0	0	0
SSC_001539	SSC_001539-T1	2335	2	838	1	1497	2	510	1	96	1	232
SSC_001540	SSC_001540-T1	1672	3	1275	2	397	3	1095	0	0	1	180
SSC_001541	SSC_001541-T1	4082	8	2025	7	2057	8	1659	1	28	1	338
SSC_001542	SSC_001542-T1	6546	14	1857	13	4689	14	1857	0	0	0	0
SSC_001543	SSC_001543-T1	2845	12	1434	11	1411	12	1434	0	0	0	0
SSC_001545	SSC_001545-T1	558	1	558	0	0	1	558	0	0	0	0
SSC_001546	SSC_001546-T1	484	2	390	1	94	2	390	0	0	0	0
SSC_001548	SSC_001548-T1	1393	3	986	2	407	3	405	1	90	1	491
SSC_001549	SSC_001549-T1	1002	2	762	1	240	2	405	1	109	1	248
SSC_001550	SSC_001550-T1	983	3	518	2	465	3	360	1	147	1	11
SSC_001551	SSC_001551-T1	4399	8	1451	7	2948	8	933	1	92	1	426
SSC_001552	SSC_001552-T1	1131	1	1131	0	0	1	1131	0	0	0	0
SSC_001553	SSC_001553-T1	3808	3	3645	2	163	3	3645	0	0	0	0
SSC_001555	SSC_001555-T1	2984	3	2501	2	483	3	2085	1	172	1	244
SSC_001556	SSC_001556-T1	3855	11	1378	10	2477	11	984	1	216	1	178
SSC_001557	SSC_001557-T1	2553	5	1284	4	1269	5	1284	0	0	0	0
SSC_001558	SSC_001558-T1	2840	7	1467	6	1373	7	933	1	172	1	362
SSC_001559	SSC_001559-T1	1047	1	1047	0	0	1	1047	0	0	0	0
SSC_001561	SSC_001561-T1	1611	1	1611	0	0	1	1611	0	0	0	0
SSC_001563	SSC_001563-T1	2172	5	881	4	1291	4	471	2	116	1	294
SSC_001564	SSC_001564-T1	1984	5	1158	4	826	5	1086	0	0	1	72
SSC_001565	SSC_001565-T1	2070	1	2070	0	0	1	2070	0	0	0	0
SSC_001566	SSC_001566-T1	3948	7	1774	6	2174	7	1473	1	87	1	214
SSC_001567	SSC_001567-T1	3386	7	1653	6	1733	7	1473	0	0	1	180
SSC_001568	SSC_001568-T1	2963	7	1397	6	1566	7	909	1	59	1	429
SSC_001574	SSC_001574-T1	1316	2	723	1	593	2	723	0	0	0	0
SSC_001575	SSC_001575-T1	3802	4	1087	3	2715	4	828	1	107	1	152
SSC_001578	SSC_001578-T1	1187	3	1017	2	170	3	1017	0	0	0	0
SSC_001581	SSC_001581-T1	1373	2	1230	1	143	2	1230	0	0	0	0
SSC_001582	SSC_001582-T1	2342	7	861	6	1481	7	861	0	0	0	0
SSC_001583	SSC_001583-T1	3091	3	1720	2	1371	3	1581	1	5	1	134
SSC_001584	SSC_001584-T1	777	1	777	0	0	1	777	0	0	0	0
SSC_001586	SSC_001586-T1	887	4	501	3	386	4	501	0	0	0	0
SSC_001587	SSC_001587-T1	2678	3	1086	2	1592	3	681	1	92	1	313
SSC_001589	SSC_001589-T1	3250	2	1711	1	1539	1	1038	2	465	1	208
SSC_001590	SSC_001590-T1	2079	4	1085	3	994	4	690	1	95	1	300
SSC_001591	SSC_001591-T1	2019	1	2019	0	0	1	1824	0	0	1	195
SSC_001594	SSC_001594-T1	1967	4	1308	3	659	4	741	1	33	1	534
SSC_001595	SSC_001595-T1	1382	2	1266	1	116	2	1266	0	0	0	0
SSC_001600	SSC_001600-T1	2929	8	1342	7	1587	7	870	2	103	1	369
SSC_001602	SSC_001602-T1	930	3	576	2	354	3	576	0	0	0	0
SSC_001604	SSC_001604-T1	1038	1	1038	0	0	1	1038	0	0	0	0
SSC_001607	SSC_001607-T1	729	2	480	1	249	2	480	0	0	0	0
SSC_001614	SSC_001614-T1	4640	5	2472	4	2168	5	2472	0	0	0	0
SSC_001616	SSC_001616-T1	1942	3	675	2	1267	3	363	1	67	1	245
SSC_001617	SSC_001617-T1	7363	2	849	2	6514	2	687	1	20	1	142
SSC_001619	SSC_001619-T1	2435	3	1342	2	1093	3	1263	1	19	1	60
SSC_001620	SSC_001620-T1	6575	11	1255	10	5320	10	846	2	210	1	199
SSC_001621	SSC_001621-T1	5067	10	1247	9	3820	10	1041	1	34	1	172
SSC_001622	SSC_001622-T1	4033	7	2271	6	1762	6	1827	2	95	1	349
SSC_001626	SSC_001626-T1	1350	1	1350	0	0	1	1350	0	0	0	0
SSC_001628	SSC_001628-T1	2638	6	905	5	1733	5	363	2	134	1	408
SSC_001634	SSC_001634-T1	3607	11	1749	10	1858	11	1206	1	159	1	384
SSC_001636	SSC_001636-T1	5951	12	3123	11	2828	12	2814	0	0	1	309
SSC_001637	SSC_001637-T1	6485	14	1925	13	4560	14	1494	1	161	1	270
SSC_001638	SSC_001638-T1	2712	5	1346	4	1366	4	774	1	165	2	407
SSC_001640	SSC_001640-T1	4477	8	1614	7	2863	8	1371	0	0	1	243
SSC_001642	SSC_001642-T1	12898	7	2078	6	10820	7	1305	1	243	1	530
SSC_001644	SSC_001644-T1	616	2	420	1	196	2	420	0	0	0	0
SSC_001645	SSC_001645-T1	1004	3	642	2	362	3	642	0	0	0	0
SSC_001647	SSC_001647-T1	4009	6	2958	5	1051	6	2787	0	0	1	171
SSC_001648	SSC_001648-T1	3769	6	1433	5	2336	6	825	1	68	1	540
SSC_001649	SSC_001649-T1	1805	2	835	1	970	2	498	1	118	1	219
SSC_001650	SSC_001650-T1	1108	4	837	3	271	4	837	0	0	0	0
SSC_001656	SSC_001656-T1	1206	4	651	3	555	4	651	0	0	0	0
SSC_001660	SSC_001660-T1	1807	4	480	3	1327	4	480	0	0	0	0
SSC_001662	SSC_001662-T1	3216	5	773	4	2443	5	354	1	124	1	295
SSC_001663	SSC_001663-T1	1274	3	1081	2	193	3	681	1	136	1	264
SSC_001664	SSC_001664-T1	588	2	549	1	39	2	549	0	0	0	0
SSC_001665	SSC_001665-T1	561	1	561	0	0	1	561	0	0	0	0
SSC_001666	SSC_001666-T1	3604	4	1920	3	1684	4	1737	1	51	1	132
SSC_001667	SSC_001667-T1	716	2	342	1	374	2	342	0	0	0	0
SSC_001668	SSC_001668-T1	3394	3	894	2	2500	3	894	0	0	0	0
SSC_001669	SSC_001669-T1	990	2	588	1	402	2	588	0	0	0	0
SSC_001672	SSC_001672-T1	2217	4	786	3	1431	3	342	2	199	1	245
SSC_001676	SSC_001676-T1	1598	4	1016	3	582	4	504	1	229	1	283
SSC_001677	SSC_001677-T1	1179	3	840	2	339	3	840	0	0	0	0
SSC_001678	SSC_001678-T1	1486	2	1394	1	92	2	744	1	180	1	470
SSC_001679	SSC_001679-T1	5588	5	1963	4	3625	4	1335	2	200	1	428
SSC_001682	SSC_001682-T1	1195	2	1058	1	137	2	573	1	174	1	311
SSC_001685	SSC_001685-T1	7161	6	1617	5	5544	6	1326	1	11	1	280
SSC_001689	SSC_001689-T1	2052	2	1358	1	694	1	747	2	264	1	347
SSC_001691	SSC_001691-T1	1509	2	744	1	765	2	744	0	0	0	0
SSC_001692	SSC_001692-T1	1441	3	774	2	667	3	774	0	0	0	0
SSC_001693	SSC_001693-T1	1616	1	1616	0	0	1	1338	1	100	1	178
SSC_001694	SSC_001694-T1	3315	4	1185	3	2130	4	1185	0	0	0	0
SSC_001695	SSC_001695-T1	786	2	681	1	105	2	681	0	0	0	0
SSC_001696	SSC_001696-T1	873	2	795	1	78	2	795	0	0	0	0
SSC_001697	SSC_001697-T1	1860	4	447	3	1413	4	447	0	0	0	0
SSC_001698	SSC_001698-T1	1737	1	1737	0	0	1	1737	0	0	0	0
SSC_001700	SSC_001700-T1	1760	3	294	2	1466	3	294	0	0	0	0
SSC_001701	SSC_001701-T1	2853	4	642	3	2211	4	642	0	0	0	0
SSC_001702	SSC_001702-T1	2780	4	1986	3	794	4	1986	0	0	0	0
SSC_001703	SSC_001703-T1	4409	16	1666	15	2743	15	1236	1	89	2	341
SSC_001704	SSC_001704-T1	4005	8	1000	7	3005	8	915	0	0	1	85
SSC_001708	SSC_001708-T1	4798	4	2961	3	1837	4	2958	1	3	0	0
SSC_001714	SSC_001714-T1	1328	2	469	1	859	2	330	1	30	1	109
SSC_001715	SSC_001715-T1	10985	8	1836	7	9149	8	1836	0	0	0	0
SSC_001716	SSC_001716-T1	4261	13	1664	12	2597	13	1344	0	0	1	320
SSC_001717	SSC_001717-T1	4166	6	1153	5	3013	5	669	2	257	1	227
SSC_001719	SSC_001719-T1	4533	6	1059	5	3474	5	600	2	189	1	270
SSC_001721	SSC_001721-T1	4538	7	1173	6	3365	7	1173	0	0	0	0
SSC_001722	SSC_001722-T1	7389	5	1938	4	5451	5	1401	1	97	1	440
SSC_001724	SSC_001724-T1	3620	11	1430	10	2190	11	993	1	180	1	257
SSC_001725	SSC_001725-T1	1988	7	1462	6	526	7	915	1	320	1	227
SSC_001728	SSC_001728-T1	2653	2	829	3	1824	2	477	1	106	1	246
SSC_001731	SSC_001731-T1	4295	4	1613	3	2682	4	1032	1	43	1	538
SSC_001733	SSC_001733-T1	1875	3	1587	2	288	3	1587	0	0	0	0
SSC_001734	SSC_001734-T1	1569	1	1569	0	0	1	1569	0	0	0	0
SSC_001735	SSC_001735-T1	1483	1	1483	0	0	1	1089	1	157	1	237
SSC_001736	SSC_001736-T1	2252	3	1686	2	566	3	1347	1	75	1	264
SSC_001737	SSC_001737-T1	1219	1	1219	0	0	1	741	1	247	1	231
SSC_001738	SSC_001738-T1	2762	2	1584	1	1178	2	1407	0	0	1	177
SSC_001741	SSC_001741-T1	1874	2	1416	1	458	2	1416	0	0	0	0
SSC_001742	SSC_001742-T1	754	2	411	1	343	2	411	0	0	0	0
SSC_001743	SSC_001743-T1	1428	3	717	2	711	3	717	0	0	0	0
SSC_001744	SSC_001744-T1	684	2	534	1	150	2	534	0	0	0	0
SSC_001745	SSC_001745-T1	4304	8	2058	7	2246	8	1533	1	13	1	512
SSC_001746	SSC_001746-T1	3143	4	1909	3	1234	3	1092	1	85	2	732
SSC_001752	SSC_001752-T1	767	1	767	0	0	1	759	0	0	1	8
SSC_001754	SSC_001754-T1	834	2	555	1	279	2	555	0	0	0	0
SSC_001755	SSC_001755-T1	318	1	318	0	0	1	318	0	0	0	0
SSC_001756	SSC_001756-T1	2937	3	2041	2	896	3	1581	1	113	1	347
SSC_001757	SSC_001757-T1	3029	3	1793	2	1236	2	1239	1	105	2	449
SSC_001758	SSC_001758-T1	2490	2	2147	1	343	2	1725	1	121	1	301
SSC_001759	SSC_001759-T1	2389	3	1556	2	833	3	1494	0	0	1	62
SSC_001760	SSC_001760-T1	554	1	554	0	0	1	435	1	1	1	118
SSC_001762	SSC_001762-T1	3485	4	948	3	2537	4	948	0	0	0	0
SSC_001763	SSC_001763-T1	2178	9	1051	8	1127	9	918	1	7	1	126
SSC_001764	SSC_001764-T1	2385	2	1710	1	675	2	1710	0	0	0	0
SSC_001765	SSC_001765-T1	2099	4	1014	3	1085	4	630	1	89	1	295
SSC_001766	SSC_001766-T1	2986	2	1709	1	1277	2	1059	1	133	1	517
SSC_001767	SSC_001767-T1	4038	8	1027	7	3011	8	705	1	103	1	219
SSC_001768	SSC_001768-T1	16073	22	3049	21	13024	22	2460	0	0	1	589
SSC_001769	SSC_001769-T1	71610	7	4086	6	67524	7	4086	0	0	0	0
SSC_001771	SSC_001771-T1	408	1	408	0	0	1	408	0	0	0	0
SSC_001772	SSC_001772-T1	5836	9	3615	8	2221	9	3615	0	0	0	0
SSC_001773	SSC_001773-T1	840	2	822	1	18	2	822	0	0	0	0
SSC_001774	SSC_001774-T1	5574	7	4200	6	1374	7	4200	0	0	0	0
SSC_001775	SSC_001775-T1	498	1	498	0	0	1	498	0	0	0	0
SSC_001776	SSC_001776-T1	3009	3	783	2	2226	3	783	0	0	0	0
SSC_001777	SSC_001777-T1	4225	3	1722	2	2503	3	1722	0	0	0	0
SSC_001778	SSC_001778-T1	543	1	543	0	0	1	543	0	0	0	0
SSC_001779	SSC_001779-T1	495	1	495	0	0	1	495	0	0	0	0
SSC_001781	SSC_001781-T1	2147	3	615	2	1532	3	615	0	0	0	0
SSC_001785	SSC_001785-T1	1308	2	1056	1	252	2	1056	0	0	0	0
SSC_001786	SSC_001786-T1	3470	4	1757	3	1713	4	1757	0	0	0	0
SSC_001787	SSC_001787-T1	1718	1	1718	0	0	1	1718	0	0	0	0
SSC_001788	SSC_001788-T1	4219	16	1365	15	2854	16	1365	0	0	0	0
SSC_001789	SSC_001789-T1	5832	6	1041	5	4791	5	969	2	72	0	0
SSC_001790	SSC_001790-T1	992	2	820	1	172	2	642	1	51	1	127
SSC_001791	SSC_001791-T1	1164	1	1164	0	0	1	1089	1	70	1	5
SSC_001792	SSC_001792-T1	3100	3	1260	2	1840	3	1032	1	68	1	160
SSC_001793	SSC_001793-T1	3288	7	1063	6	2225	7	651	1	71	1	341
SSC_001794	SSC_001794-T1	2999	3	1588	2	1411	2	840	2	543	1	205
SSC_001796	SSC_001796-T1	11729	23	5086	22	6643	22	2169	1	441	2	2476
SSC_001797	SSC_001797-T1	3605	2	1740	1	1865	2	1740	0	0	0	0
SSC_001798	SSC_001798-T1	2935	2	2856	1	79	2	2667	1	189	0	0
SSC_001799	SSC_001799-T1	2720	8	1141	8	1579	6	693	2	158	2	290
SSC_001801	SSC_001801-T1	1399	4	1043	3	356	4	942	1	31	1	70
SSC_001802	SSC_001802-T1	1512	4	945	3	567	4	945	0	0	0	0
SSC_001803	SSC_001803-T1	3645	4	1080	3	2565	4	942	1	74	1	64
SSC_001804	SSC_001804-T1	2292	5	1042	4	1250	5	819	1	162	1	61
SSC_001806	SSC_001806-T1	3739	2	2090	1	1649	2	1638	1	181	1	271
SSC_001807	SSC_001807-T1	2316	4	922	3	1394	4	522	1	98	1	302
SSC_001808	SSC_001808-T1	3134	7	1752	6	1382	7	1386	1	123	1	243
SSC_001809	SSC_001809-T1	337	2	213	1	124	2	213	0	0	0	0
SSC_001810	SSC_001810-T1	2141	3	1269	2	872	3	1269	0	0	0	0
SSC_001811	SSC_001811-T1	5604	11	2743	10	2861	11	2370	1	67	1	306
SSC_001812	SSC_001812-T1	2722	5	1292	4	1430	5	1224	0	0	1	68
SSC_001813	SSC_001813-T1	4326	12	914	11	3412	12	717	1	197	0	0
SSC_001814	SSC_001814-T1	3514	4	2434	3	1080	4	2136	0	0	1	298
SSC_001815	SSC_001815-T1	4786	14	1864	13	2922	13	1638	1	140	2	86
SSC_001816	SSC_001816-T1	2828	2	2733	1	95	2	2733	0	0	0	0
SSC_001817	SSC_001817-T1	2880	1	2880	0	0	1	2781	1	10	1	89
SSC_001818	SSC_001818-T1	5916	12	2504	11	3412	12	2142	0	0	1	362
SSC_001821	SSC_001821-T1	4961	6	1525	5	3436	6	1161	1	183	1	181
SSC_001822	SSC_001822-T1	3753	8	2012	7	1741	8	1875	1	137	0	0
SSC_001823	SSC_001823-T1	1855	1	1855	0	0	1	1824	0	0	1	31
SSC_001824	SSC_001824-T1	2395	6	1130	5	1265	6	540	1	276	1	314
SSC_001825	SSC_001825-T1	855	3	174	2	681	3	174	0	0	0	0
SSC_001827	SSC_001827-T1	3061	4	1436	3	1625	3	1236	2	87	1	113
SSC_001828	SSC_001828-T1	3933	8	2506	7	1427	8	2268	1	95	1	143
SSC_001829	SSC_001829-T1	3208	1	3208	0	0	1	2892	1	182	1	134
SSC_001830	SSC_001830-T1	5517	13	2007	12	3510	12	1230	2	407	1	370
SSC_001833	SSC_001833-T1	4705	6	1853	5	2852	5	1323	2	171	1	359
SSC_001834	SSC_001834-T1	2394	2	1149	1	1245	2	1149	0	0	0	0
SSC_001835	SSC_001835-T1	6934	3	1269	2	5665	3	1134	1	36	1	99
SSC_001837	SSC_001837-T1	1307	3	975	2	332	3	975	0	0	0	0
SSC_001839	SSC_001839-T1	3642	9	1720	8	1922	9	1221	1	101	1	398
SSC_001840	SSC_001840-T1	4924	15	2385	14	2539	15	1833	1	360	1	192
SSC_001841	SSC_001841-T1	1308	3	846	2	462	3	846	0	0	0	0
SSC_001842	SSC_001842-T1	1340	2	918	1	422	2	918	0	0	0	0
SSC_001843	SSC_001843-T1	2293	2	2101	1	192	2	1533	1	22	0	0
SSC_001844	SSC_001844-T1	1983	7	1122	6	861	7	1122	0	0	0	0
SSC_001845	SSC_001845-T1	1936	3	1566	2	370	3	1566	0	0	0	0
SSC_001846	SSC_001846-T1	4926	14	1734	13	3192	14	1617	0	0	1	117
SSC_001847	SSC_001847-T1	1961	1	1961	0	0	1	1425	1	166	1	370
SSC_001848	SSC_001848-T1	1452	6	865	5	587	6	534	1	111	1	220
SSC_001849	SSC_001849-T1	2188	7	1392	6	796	7	1116	1	36	1	240
SSC_001850	SSC_001850-T1	3933	9	1862	8	2071	9	1497	0	0	1	365
SSC_001854	SSC_001854-T1	2705	4	1390	3	1315	4	615	1	85	1	690
SSC_001855	SSC_001855-T1	2055	4	1118	3	937	4	687	1	82	1	349
SSC_001857	SSC_001857-T1	4963	16	1947	15	3016	16	1737	1	14	1	196
SSC_001858	SSC_001858-T1	3256	7	1711	6	1545	7	1341	1	201	1	169
SSC_001859	SSC_001859-T1	2753	8	1923	7	830	8	1923	0	0	0	0
SSC_001860	SSC_001860-T1	784	1	784	0	0	1	594	1	22	1	168
SSC_001863	SSC_001863-T1	600	1	600	0	0	1	600	0	0	0	0
SSC_001864	SSC_001864-T1	2378	3	1355	2	1023	3	873	1	170	1	312
SSC_001865	SSC_001865-T1	2372	6	1172	5	1200	6	1077	0	0	1	95
SSC_001866	SSC_001866-T1	2481	3	1498	2	983	3	786	1	139	1	573
SSC_001867	SSC_001867-T1	3663	8	1679	7	1984	7	1305	2	213	1	161
SSC_001868	SSC_001868-T1	867	4	567	3	300	4	567	0	0	0	0
SSC_001870	SSC_001870-T1	2766	4	878	3	1888	4	594	1	68	1	216
SSC_001871	SSC_001871-T1	3638	6	1281	5	2357	6	1068	1	77	1	136
SSC_001872	SSC_001872-T1	2261	2	1843	1	418	2	1335	1	387	1	121
SSC_001874	SSC_001874-T1	3880	6	2787	5	1093	6	2787	0	0	0	0
SSC_001875	SSC_001875-T1	1401	2	936	1	465	2	603	1	93	1	240
SSC_001877	SSC_001877-T1	2018	3	1022	2	996	3	720	1	113	1	189
SSC_001878	SSC_001878-T1	1719	2	669	1	1050	2	669	0	0	0	0
SSC_001879	SSC_001879-T1	1167	2	684	1	483	2	684	0	0	0	0
SSC_001880	SSC_001880-T1	906	3	723	2	183	3	723	0	0	0	0
SSC_001881	SSC_001881-T1	1841	3	613	2	1228	3	366	1	70	1	177
SSC_001882	SSC_001882-T1	1216	1	1216	0	0	1	978	1	44	1	194
SSC_001883	SSC_001883-T1	5516	8	3111	7	2405	7	2670	1	34	2	407
SSC_001884	SSC_001884-T1	3392	13	1588	12	1804	13	1128	1	197	1	263
SSC_001886	SSC_001886-T1	6794	15	2548	14	4246	15	2250	0	0	1	298
SSC_001887	SSC_001887-T1	651	1	651	0	0	1	651	0	0	0	0
SSC_001888	SSC_001888-T1	933	3	519	2	414	3	519	0	0	0	0
SSC_001891	SSC_001891-T1	899	2	612	1	287	2	612	0	0	0	0
SSC_001892	SSC_001892-T1	7570	4	1125	3	6445	4	1125	0	0	0	0
SSC_001893	SSC_001893-T1	2067	6	893	5	1174	6	564	1	183	1	146
SSC_001894	SSC_001894-T1	498	1	498	0	0	1	498	0	0	0	0
SSC_001895	SSC_001895-T1	480	1	480	0	0	1	480	0	0	0	0
SSC_001896	SSC_001896-T1	462	1	462	0	0	1	462	0	0	0	0
SSC_001897	SSC_001897-T1	423	1	423	0	0	1	423	0	0	0	0
SSC_001898	SSC_001898-T1	429	1	429	0	0	1	429	0	0	0	0
SSC_001899	SSC_001899-T1	441	1	441	0	0	1	441	0	0	0	0
SSC_001900	SSC_001900-T1	2158	5	675	4	1483	4	342	2	177	1	156
SSC_001901	SSC_001901-T1	3024	8	1339	7	1685	8	897	1	119	1	323
SSC_001902	SSC_001902-T1	5145	11	1942	10	3203	11	1332	1	302	1	308
SSC_001903	SSC_001903-T1	1470	2	1309	1	161	2	813	1	43	1	453
SSC_001904	SSC_001904-T1	6467	15	1742	14	4725	15	1443	1	20	1	279
SSC_001907	SSC_001907-T1	1422	3	858	2	564	3	657	1	89	1	112
SSC_001909	SSC_001909-T1	3467	8	2013	7	1454	8	2013	0	0	0	0
SSC_001910	SSC_001910-T1	1374	2	1284	1	90	2	1284	0	0	0	0
SSC_001911	SSC_001911-T1	744	3	513	2	231	3	513	0	0	0	0
SSC_001912	SSC_001912-T1	8068	2	1463	1	6605	2	1218	1	24	1	221
SSC_001914	SSC_001914-T1	752	3	576	2	176	3	576	0	0	0	0
SSC_001915	SSC_001915-T1	5331	2	1570	1	3761	2	1110	1	415	1	45
SSC_001917	SSC_001917-T1	51685	5	3567	4	48118	5	3567	0	0	0	0
SSC_001918	SSC_001918-T1	355	2	282	1	73	2	282	0	0	0	0
SSC_001919	SSC_001919-T1	4840	6	3929	5	911	5	3789	0	0	2	140
SSC_001920	SSC_001920-T1	2997	3	1376	2	1621	3	843	1	206	1	327
SSC_001921	SSC_001921-T1	1189	1	1189	0	0	1	876	1	54	1	259
SSC_001922	SSC_001922-T1	3445	8	1466	7	1979	8	927	1	54	1	485
SSC_001923	SSC_001923-T1	1577	2	1047	1	530	2	1047	0	0	0	0
SSC_001924	SSC_001924-T1	21280	2	1129	1	20151	2	834	1	99	1	196
SSC_001925	SSC_001925-T1	1153	1	1153	0	0	1	828	1	58	1	267
SSC_001926	SSC_001926-T1	831	1	831	0	0	1	831	0	0	0	0
SSC_001928	SSC_001928-T1	836	3	657	2	179	3	657	0	0	0	0
SSC_001929	SSC_001929-T1	843	1	843	0	0	1	843	0	0	0	0
SSC_001930	SSC_001930-T1	1169	2	612	1	557	2	612	0	0	0	0
SSC_001931	SSC_001931-T1	882	2	843	1	39	2	843	0	0	0	0
SSC_001932	SSC_001932-T1	1047	1	1047	0	0	1	810	1	33	1	204
SSC_001933	SSC_001933-T1	885	1	885	0	0	1	828	1	38	1	19
SSC_001934	SSC_001934-T1	5175	3	1389	2	3786	3	1389	0	0	0	0
SSC_001935	SSC_001935-T1	4959	2	1590	1	3369	2	1590	0	0	0	0
SSC_001936	SSC_001936-T1	834	1	834	0	0	1	834	0	0	0	0
SSC_001937	SSC_001937-T1	3724	4	1083	3	2641	4	1083	0	0	0	0
SSC_001938	SSC_001938-T1	2245	1	2245	0	0	1	1323	1	561	1	361
SSC_001939	SSC_001939-T1	2164	2	888	1	1276	2	585	1	61	1	242
SSC_001940	SSC_001940-T1	3746	12	1743	11	2003	11	1227	1	46	2	470
SSC_001941	SSC_001941-T1	5784	14	3342	13	2442	14	3291	0	0	1	51
SSC_001942	SSC_001942-T1	2815	5	769	4	2046	5	585	1	26	1	158
SSC_001943	SSC_001943-T1	5076	13	2188	12	2888	12	1668	2	128	1	392
SSC_001944	SSC_001944-T1	3091	7	1278	6	1813	7	813	1	72	1	393
SSC_001945	SSC_001945-T1	4621	8	1300	7	3321	8	603	1	303	1	394
SSC_001946	SSC_001946-T1	7164	23	2516	22	4648	22	1791	2	368	1	357
SSC_001947	SSC_001947-T1	3626	10	1654	9	1972	10	1236	1	48	1	370
SSC_001949	SSC_001949-T1	9576	7	2183	6	7393	7	1890	1	24	1	269
SSC_001950	SSC_001950-T1	780	1	780	0	0	1	780	0	0	0	0
SSC_001951	SSC_001951-T1	54878	8	642	7	54236	8	642	0	0	0	0
SSC_001952	SSC_001952-T1	3929	9	1730	8	2199	9	1548	1	72	1	110
SSC_001953	SSC_001953-T1	1414	4	360	3	1054	4	360	0	0	0	0
SSC_001954	SSC_001954-T1	2071	4	1281	3	790	4	1110	0	0	1	171
SSC_001956	SSC_001956-T1	1787	2	1707	1	80	2	1707	0	0	0	0
SSC_001957	SSC_001957-T1	5241	3	2001	2	3240	3	1788	1	27	1	186
SSC_001958	SSC_001958-T1	4249	7	1871	6	2378	7	1599	1	76	1	196
SSC_001959	SSC_001959-T1	3496	8	1297	7	2199	7	693	2	229	1	375
SSC_001960	SSC_001960-T1	2160	2	1125	1	1035	2	1125	0	0	0	0
SSC_001961	SSC_001961-T1	929	3	754	2	175	3	546	1	75	1	133
SSC_001963	SSC_001963-T1	4626	5	2353	4	2273	5	2052	1	139	1	162
SSC_001964	SSC_001964-T1	2556	3	2015	2	541	3	1812	0	0	1	203
SSC_001965	SSC_001965-T1	1934	4	1674	3	260	4	1344	0	0	1	330
SSC_001967	SSC_001967-T1	1227	2	1146	1	81	2	1146	0	0	0	0
SSC_001968	SSC_001968-T1	2324	8	1530	7	794	8	1143	1	192	1	195
SSC_001969	SSC_001969-T1	2550	4	1806	3	744	3	1260	2	408	1	138
SSC_001971	SSC_001971-T1	3997	10	2108	9	1889	8	1287	3	416	1	405
SSC_001972	SSC_001972-T1	1186	2	789	1	397	2	789	0	0	0	0
SSC_001974	SSC_001974-T1	1128	1	1128	0	0	1	1128	0	0	0	0
SSC_001975	SSC_001975-T1	2105	4	1680	3	425	4	1671	0	0	1	9
SSC_001976	SSC_001976-T1	2671	4	1993	3	678	4	1896	1	97	0	0
SSC_001977	SSC_001977-T1	2826	3	1875	2	951	3	1875	0	0	0	0
SSC_001978	SSC_001978-T1	6099	12	2327	11	3772	12	1458	1	322	1	547
SSC_001981	SSC_001981-T1	3717	11	1634	10	2083	11	1197	1	437	0	0
SSC_001982	SSC_001982-T1	1386	1	1386	0	0	1	795	1	302	1	289
SSC_001983	SSC_001983-T1	7602	6	1572	5	6030	6	1572	0	0	0	0
SSC_001984	SSC_001984-T1	1907	3	1746	2	161	3	933	1	204	1	609
SSC_001985	SSC_001985-T1	1215	3	645	2	570	3	645	0	0	0	0
SSC_001986	SSC_001986-T1	543	1	543	0	0	1	543	0	0	0	0
SSC_001989	SSC_001989-T1	1218	3	1017	2	201	3	1017	0	0	0	0
SSC_001990	SSC_001990-T1	6542	20	2221	19	4321	19	1617	2	189	1	415
SSC_001991	SSC_001991-T1	1975	9	1151	8	824	9	861	1	102	1	188
SSC_001993	SSC_001993-T1	1095	1	1095	0	0	1	672	1	62	1	361
SSC_001994	SSC_001994-T1	1132	2	939	1	193	2	939	0	0	0	0
SSC_001995	SSC_001995-T1	1815	6	1296	5	519	6	1296	0	0	0	0
SSC_001996	SSC_001996-T1	1857	5	1424	4	433	5	1122	1	93	1	209
SSC_001997	SSC_001997-T1	2524	7	1244	6	1280	6	978	1	130	2	136
SSC_001999	SSC_001999-T1	1708	3	699	2	1009	3	699	0	0	0	0
SSC_002000	SSC_002000-T1	3072	4	1111	3	1961	4	834	1	38	1	239
SSC_002002	SSC_002002-T1	1234	3	1008	2	226	3	579	1	133	1	296
SSC_002003	SSC_002003-T1	741	1	741	0	0	1	327	1	178	1	236
SSC_002004	SSC_002004-T1	1449	2	1355	1	94	2	1317	0	0	1	38
SSC_002006	SSC_002006-T1	1095	3	858	2	237	3	858	0	0	0	0
SSC_002008	SSC_002008-T1	1901	4	927	3	974	4	621	1	150	1	156
SSC_002009	SSC_002009-T1	1630	2	1491	1	139	1	1038	1	98	2	355
SSC_002010	SSC_002010-T1	1279	2	1110	1	169	2	1110	0	0	0	0
SSC_002011	SSC_002011-T1	1119	1	1119	0	0	1	1119	0	0	0	0
SSC_002012	SSC_002012-T1	3730	8	1411	7	2319	8	1146	1	146	1	119
SSC_002013	SSC_002013-T1	1418	2	294	1	1124	2	294	0	0	0	0
SSC_002014	SSC_002014-T1	8865	16	2909	15	5956	16	2751	0	0	1	158
SSC_002019	SSC_002019-T1	3383	3	2317	2	1066	3	1755	1	110	1	452
SSC_002020	SSC_002020-T1	3886	9	1221	8	2665	9	1221	0	0	0	0
SSC_002022	SSC_002022-T1	793	2	690	1	103	2	690	0	0	0	0
SSC_002023	SSC_002023-T1	1608	1	1608	0	0	1	1008	1	353	1	247
SSC_002026	SSC_002026-T1	10082	14	2780	13	7302	14	2715	0	0	1	65
SSC_002027	SSC_002027-T1	6447	9	2130	8	4317	9	2130	0	0	0	0
SSC_002028	SSC_002028-T1	528	1	528	0	0	1	528	0	0	0	0
SSC_002032	SSC_002032-T1	3014	3	922	3	2092	3	462	1	160	1	300
SSC_002033	SSC_002033-T1	1439	3	1269	2	170	3	1212	0	0	1	57
SSC_002034	SSC_002034-T1	5716	7	2803	6	2913	7	2493	0	0	1	310
SSC_002036	SSC_002036-T1	3584	7	402	6	3182	6	282	0	0	2	120
SSC_002040	SSC_002040-T1	1285	1	1285	0	0	1	825	1	292	1	168
SSC_002042	SSC_002042-T1	3311	9	1307	8	2004	9	945	1	116	1	246
SSC_002044	SSC_002044-T1	1808	1	1808	0	0	1	1503	1	12	1	293
SSC_002046	SSC_002046-T1	897	1	897	0	0	1	897	0	0	0	0
SSC_002051	SSC_002051-T1	7448	4	1458	3	5990	4	1458	0	0	0	0
SSC_002052	SSC_002052-T1	2687	4	1192	3	1495	4	789	1	38	1	365
SSC_002053	SSC_002053-T1	3258	11	1332	10	1926	11	1332	0	0	0	0
SSC_002054	SSC_002054-T1	1142	4	705	3	437	4	705	0	0	0	0
SSC_002055	SSC_002055-T1	5849	11	1978	10	3871	10	1671	1	175	2	132
SSC_002059	SSC_002059-T1	1617	5	960	4	657	5	717	1	59	1	184
SSC_002060	SSC_002060-T1	3763	5	2929	4	834	4	2529	2	165	1	235
SSC_002061	SSC_002061-T1	1013	1	1013	0	0	1	432	1	48	1	533
SSC_002062	SSC_002062-T1	1501	4	1203	3	298	4	1203	0	0	0	0
SSC_002063	SSC_002063-T1	1269	1	1269	0	0	1	1269	0	0	0	0
SSC_002064	SSC_002064-T1	1115	2	387	1	728	2	387	0	0	0	0
SSC_002065	SSC_002065-T1	3323	6	2533	5	790	6	2133	0	0	1	400
SSC_002066	SSC_002066-T1	5356	16	2315	15	3041	16	1608	1	311	1	396
SSC_002067	SSC_002067-T1	643	2	562	1	81	2	255	1	24	1	283
SSC_002068	SSC_002068-T1	935	4	618	3	317	4	411	1	63	1	144
SSC_002069	SSC_002069-T1	1695	1	1695	0	0	1	1695	0	0	0	0
SSC_002070	SSC_002070-T1	3897	14	1667	13	2230	13	1122	2	439	1	106
SSC_002071	SSC_002071-T1	1105	4	435	3	670	4	435	0	0	0	0
SSC_002072	SSC_002072-T1	3441	1	3441	0	0	1	3441	0	0	0	0
SSC_002073	SSC_002073-T1	4687	12	2766	11	1921	12	2748	0	0	1	18
SSC_002074	SSC_002074-T1	4670	14	2135	13	2535	14	2058	0	0	1	77
SSC_002076	SSC_002076-T1	5419	7	2949	6	2470	7	2493	0	0	1	456
SSC_002077	SSC_002077-T1	2684	7	684	6	2000	7	684	0	0	0	0
SSC_002078	SSC_002078-T1	3222	2	1338	1	1884	2	1224	1	24	1	90
SSC_002079	SSC_002079-T1	2438	3	1620	2	818	2	1035	2	400	1	185
SSC_002080	SSC_002080-T1	3887	6	1394	5	2493	6	786	1	104	1	504
SSC_002081	SSC_002081-T1	2393	4	1583	3	810	4	1167	1	75	1	341
SSC_002083	SSC_002083-T1	2194	4	1671	3	523	4	1671	0	0	0	0
SSC_002084	SSC_002084-T1	2426	6	1865	5	561	6	1215	1	40	1	610
SSC_002085	SSC_002085-T1	744	1	744	0	0	1	744	0	0	0	0
SSC_002086	SSC_002086-T1	3002	7	1558	6	1444	7	648	1	351	1	559
SSC_002087	SSC_002087-T1	2528	5	1684	4	844	5	1350	1	76	1	258
SSC_002088	SSC_002088-T1	2208	2	1451	1	757	1	879	1	289	2	283
SSC_002089	SSC_002089-T1	4268	17	2561	16	1707	17	2244	0	0	1	317
SSC_002091	SSC_002091-T1	3175	8	1529	7	1646	8	1080	1	17	1	432
SSC_002092	SSC_002092-T1	2513	4	1928	3	585	4	1515	1	108	1	305
SSC_002093	SSC_002093-T1	1977	4	1540	3	437	4	1392	0	0	1	148
SSC_002094	SSC_002094-T1	834	4	570	3	264	4	570	0	0	0	0
SSC_002095	SSC_002095-T1	1847	4	964	3	883	4	726	1	8	1	230
SSC_002096	SSC_002096-T1	3287	10	1706	9	1581	10	1197	1	155	1	354
SSC_002097	SSC_002097-T1	3455	5	1694	4	1761	3	1308	3	106	1	280
SSC_002098	SSC_002098-T1	480	1	480	0	0	1	480	0	0	0	0
SSC_002099	SSC_002099-T1	2462	3	1753	2	709	2	1119	2	343	1	291
SSC_002100	SSC_002100-T1	2177	5	1659	4	518	5	1659	0	0	0	0
SSC_002101	SSC_002101-T1	1555	3	1149	2	406	3	633	1	247	1	269
SSC_002102	SSC_002102-T1	3259	13	1451	12	1808	13	1290	0	0	1	161
SSC_002103	SSC_002103-T1	3418	11	1494	10	1924	10	1008	2	244	1	242
SSC_002104	SSC_002104-T1	4036	14	2454	13	1582	14	1857	1	149	1	448
SSC_002105	SSC_002105-T1	3020	10	1409	9	1611	8	1047	0	0	3	362
SSC_002106	SSC_002106-T1	2646	7	1948	6	698	7	1284	1	210	1	454
SSC_002107	SSC_002107-T1	3131	13	1755	12	1376	13	1467	1	288	0	0
SSC_002108	SSC_002108-T1	468	1	468	0	0	1	468	0	0	0	0
SSC_002109	SSC_002109-T1	873	3	678	2	195	3	678	0	0	0	0
SSC_002110	SSC_002110-T1	2579	6	1372	5	1207	6	1053	1	42	1	277
SSC_002111	SSC_002111-T1	888	3	636	2	252	3	636	0	0	0	0
SSC_002113	SSC_002113-T1	1610	5	1219	4	391	5	936	1	36	1	247
SSC_002114	SSC_002114-T1	2338	5	1281	4	1057	5	969	1	42	1	270
SSC_002117	SSC_002117-T1	1237	4	728	3	509	4	624	1	8	1	96
SSC_002119	SSC_002119-T1	4382	2	2009	1	2373	2	1260	1	316	1	433
SSC_002120	SSC_002120-T1	3709	4	2880	3	829	4	2691	0	0	1	189
SSC_002121	SSC_002121-T1	3781	13	1570	12	2211	13	1080	1	45	1	445
SSC_002125	SSC_002125-T1	1265	2	1044	1	221	2	1044	0	0	0	0
SSC_002126	SSC_002126-T1	3654	12	1942	11	1712	12	1479	1	215	1	248
SSC_002128	SSC_002128-T1	860	3	669	2	191	3	480	1	9	1	180
SSC_002129	SSC_002129-T1	1663	3	1128	2	535	3	1128	0	0	0	0
SSC_002130	SSC_002130-T1	891	1	891	0	0	1	891	0	0	0	0
SSC_002132	SSC_002132-T1	5694	16	1869	15	3825	16	1869	0	0	0	0
SSC_002133	SSC_002133-T1	3717	4	2189	3	1528	4	1410	1	378	1	401
SSC_002134	SSC_002134-T1	5811	4	1277	3	4534	4	1275	1	2	0	0
SSC_002135	SSC_002135-T1	1603	2	1147	1	456	1	696	1	128	1	323
SSC_002136	SSC_002136-T1	1845	1	1845	0	0	1	1131	1	277	1	437
SSC_002137	SSC_002137-T1	710	1	710	0	0	1	636	1	15	1	59
SSC_002138	SSC_002138-T1	2729	3	2313	2	416	3	2313	0	0	0	0
SSC_002139	SSC_002139-T1	3093	12	1269	11	1824	12	999	1	18	1	252
SSC_002140	SSC_002140-T1	2623	1	2623	0	0	1	2451	0	0	1	172
SSC_002141	SSC_002141-T1	4509	6	2752	5	1757	6	2238	1	28	1	486
SSC_002142	SSC_002142-T1	5368	4	1676	3	3692	3	1038	2	435	1	203
SSC_002143	SSC_002143-T1	7878	14	3357	13	4521	14	2724	1	179	1	454
SSC_002144	SSC_002144-T1	9760	21	2472	20	7288	21	2472	0	0	0	0
SSC_002145	SSC_002145-T1	3500	10	2370	9	1130	10	2277	0	0	1	93
SSC_002146	SSC_002146-T1	2536	4	1574	3	962	3	1164	2	122	1	288
SSC_002147	SSC_002147-T1	5466	13	1631	12	3835	11	849	3	591	1	191
SSC_002148	SSC_002148-T1	5141	5	1953	4	3188	5	1953	0	0	0	0
SSC_002149	SSC_002149-T1	2977	4	1353	3	1624	4	1353	0	0	0	0
SSC_002150	SSC_002150-T1	2808	9	1304	8	1504	8	675	2	254	1	375
SSC_002151	SSC_002151-T1	3649	8	1317	7	2332	8	702	1	151	1	464
SSC_002152	SSC_002152-T1	2166	5	1010	4	1156	5	525	1	56	1	429
SSC_002153	SSC_002153-T1	2182	4	939	3	1243	3	501	2	127	1	311
SSC_002154	SSC_002154-T1	4351	12	1089	12	3262	11	909	1	40	2	140
SSC_002155	SSC_002155-T1	1177	3	518	2	659	3	372	1	3	1	143
SSC_002156	SSC_002156-T1	2624	2	1152	1	1472	2	702	1	102	1	348
SSC_002157	SSC_002157-T1	2036	2	1104	1	932	2	957	1	137	1	10
SSC_002158	SSC_002158-T1	3224	2	3141	1	83	2	3132	0	0	1	9
SSC_002160	SSC_002160-T1	4539	12	2983	11	1556	12	2880	0	0	1	103
SSC_002162	SSC_002162-T1	4071	6	1330	5	2741	5	657	2	237	1	436
SSC_002163	SSC_002163-T1	1285	1	1285	0	0	1	918	1	43	1	324
SSC_002164	SSC_002164-T1	2661	5	873	4	1788	5	873	0	0	0	0
SSC_002165	SSC_002165-T1	8842	27	3987	26	4855	27	3753	0	0	1	234
SSC_002166	SSC_002166-T1	5582	4	1366	4	4216	4	960	1	227	1	179
SSC_002169	SSC_002169-T1	5599	8	747	7	4852	8	747	0	0	0	0
SSC_002170	SSC_002170-T1	4681	9	896	8	3785	8	783	2	84	1	29
SSC_002171	SSC_002171-T1	7032	8	735	7	6297	8	735	0	0	0	0
SSC_002173	SSC_002173-T1	3568	4	2411	3	1157	3	1653	1	289	2	469
SSC_002175	SSC_002175-T1	5603	14	2104	13	3499	14	1962	0	0	1	142
SSC_002176	SSC_002176-T1	2710	3	1137	2	1573	3	1137	0	0	0	0
SSC_002177	SSC_002177-T1	978	3	639	2	339	3	639	0	0	0	0
SSC_002178	SSC_002178-T1	831	2	640	1	191	2	600	0	0	1	40
SSC_002179	SSC_002179-T1	3067	4	402	3	2665	4	402	0	0	0	0
SSC_002180	SSC_002180-T1	2703	7	1307	6	1396	7	1110	1	27	1	170
SSC_002181	SSC_002181-T1	2970	7	1232	6	1738	7	1224	0	0	1	8
SSC_002182	SSC_002182-T1	4741	14	1648	13	3093	14	1308	1	89	1	251
SSC_002184	SSC_002184-T1	6577	6	4623	5	1954	5	4182	2	178	1	263
SSC_002185	SSC_002185-T1	4458	8	2393	8	2065	7	1842	2	215	1	336
SSC_002187	SSC_002187-T1	1248	1	1248	0	0	1	1248	0	0	0	0
SSC_002188	SSC_002188-T1	1283	2	743	1	540	2	591	1	85	1	67
SSC_002189	SSC_002189-T1	2167	3	1320	2	847	3	1242	0	0	1	78
SSC_002193	SSC_002193-T1	1062	4	372	3	690	4	372	0	0	0	0
SSC_002194	SSC_002194-T1	1529	4	699	3	830	4	699	0	0	0	0
SSC_002195	SSC_002195-T1	1965	4	1536	3	429	4	1125	1	75	1	336
SSC_002196	SSC_002196-T1	2341	3	1967	2	374	3	1959	0	0	1	8
SSC_002197	SSC_002197-T1	3077	8	1424	7	1653	7	900	2	122	1	402
SSC_002199	SSC_002199-T1	4142	9	1483	8	2659	9	936	1	162	1	385
SSC_002200	SSC_002200-T1	4064	9	1438	8	2626	9	1077	1	89	1	272
SSC_002202	SSC_002202-T1	3087	4	2446	3	641	3	1164	2	989	1	293
SSC_002203	SSC_002203-T1	3420	6	2192	5	1228	6	1920	1	37	1	235
SSC_002204	SSC_002204-T1	1455	2	795	1	660	2	408	1	150	1	237
SSC_002205	SSC_002205-T1	1571	2	934	1	637	2	456	1	28	1	450
SSC_002206	SSC_002206-T1	2875	9	1317	8	1558	9	984	1	138	1	195
SSC_002207	SSC_002207-T1	2036	6	1107	5	929	6	1107	0	0	0	0
SSC_002208	SSC_002208-T1	2650	2	2568	1	82	2	2541	0	0	1	27
SSC_002209	SSC_002209-T1	5165	13	2335	12	2830	13	1935	1	136	1	264
SSC_002211	SSC_002211-T1	3188	7	1912	6	1276	7	1401	1	75	1	436
SSC_002212	SSC_002212-T1	6653	10	3650	9	3003	10	2883	1	147	1	620
SSC_002213	SSC_002213-T1	3347	7	1632	6	1715	7	1632	0	0	0	0
SSC_002214	SSC_002214-T1	7997	4	2529	3	5468	4	2529	0	0	0	0
SSC_002216	SSC_002216-T1	2070	6	711	5	1359	6	711	0	0	0	0
SSC_002219	SSC_002219-T1	2174	3	1239	2	935	3	1239	0	0	0	0
SSC_002220	SSC_002220-T1	2655	6	1692	5	963	6	1440	1	34	1	218
SSC_002221	SSC_002221-T1	552	1	552	0	0	1	552	0	0	0	0
SSC_002222	SSC_002222-T1	945	1	945	0	0	1	945	0	0	0	0
SSC_002223	SSC_002223-T1	3097	3	2889	2	208	3	2889	0	0	0	0
SSC_002224	SSC_002224-T1	3285	2	3045	1	240	2	3045	0	0	0	0
SSC_002225	SSC_002225-T1	3278	2	3177	1	101	2	3078	0	0	1	99
SSC_002226	SSC_002226-T1	2018	2	1288	1	730	1	840	1	40	2	408
SSC_002228	SSC_002228-T1	2207	3	1631	2	576	2	1119	2	414	1	98
SSC_002229	SSC_002229-T1	5909	13	1644	13	4265	12	1197	2	109	1	338
SSC_002230	SSC_002230-T1	1489	1	1489	0	0	1	1356	0	0	1	133
SSC_002231	SSC_002231-T1	3567	3	2687	2	880	1	1659	1	2	3	1026
SSC_002232	SSC_002232-T1	3519	4	1533	3	1986	4	1533	0	0	0	0
SSC_002233	SSC_002233-T1	1461	2	1374	1	87	2	1374	0	0	0	0
SSC_002234	SSC_002234-T1	2628	5	1487	4	1141	5	1278	1	41	1	168
SSC_002237	SSC_002237-T1	3620	11	1533	10	2087	10	1095	2	140	1	298
SSC_002238	SSC_002238-T1	1254	2	939	1	315	2	939	0	0	0	0
SSC_002239	SSC_002239-T1	6150	11	1590	10	4560	11	1590	0	0	0	0
SSC_002241	SSC_002241-T1	1545	1	1545	0	0	1	1545	0	0	0	0
SSC_002242	SSC_002242-T1	3465	3	705	2	2760	2	204	2	97	1	404
SSC_002243	SSC_002243-T1	1993	2	1293	1	700	2	930	1	110	1	253
SSC_002244	SSC_002244-T1	1689	6	860	5	829	6	699	0	0	1	161
SSC_002245	SSC_002245-T1	1699	3	519	2	1180	3	519	0	0	0	0
SSC_002246	SSC_002246-T1	1269	1	1269	0	0	1	1269	0	0	0	0
SSC_002248	SSC_002248-T1	1857	3	1644	2	213	3	1644	0	0	0	0
SSC_002250	SSC_002250-T1	7389	6	1042	6	6347	6	702	1	115	1	225
SSC_002251	SSC_002251-T1	1772	5	1049	4	723	5	792	1	4	1	253
SSC_002252	SSC_002252-T1	2161	4	977	3	1184	4	834	1	19	1	124
SSC_002253	SSC_002253-T1	2871	8	2091	7	780	8	1923	1	30	1	138
SSC_002255	SSC_002255-T1	5781	15	2866	14	2915	15	2715	1	85	1	66
SSC_002256	SSC_002256-T1	16782	22	5801	21	10981	22	5496	0	0	1	305
SSC_002258	SSC_002258-T1	615	1	615	0	0	1	615	0	0	0	0
SSC_002259	SSC_002259-T1	2012	4	797	3	1215	4	273	1	168	1	356
SSC_002260	SSC_002260-T1	2139	5	941	4	1198	4	624	2	41	1	276
SSC_002261	SSC_002261-T1	2145	2	1746	1	399	2	1464	1	66	1	216
SSC_002262	SSC_002262-T1	3326	2	1175	1	2151	1	570	1	216	2	389
SSC_002263	SSC_002263-T1	3493	3	1380	2	2113	3	804	1	303	1	273
SSC_002264	SSC_002264-T1	558	1	558	0	0	1	558	0	0	0	0
SSC_002265	SSC_002265-T1	1293	1	1293	0	0	1	957	1	128	1	208
SSC_002266	SSC_002266-T1	582	1	582	0	0	1	582	0	0	0	0
SSC_002267	SSC_002267-T1	2140	5	1507	4	633	5	1467	0	0	1	40
SSC_002268	SSC_002268-T1	3083	4	2794	3	289	3	1977	2	186	1	631
SSC_002269	SSC_002269-T1	2455	6	1159	5	1296	6	1110	0	0	1	49
SSC_002270	SSC_002270-T1	2075	5	1008	4	1067	4	750	2	99	1	159
SSC_002271	SSC_002271-T1	3451	13	2323	12	1128	13	2115	0	0	1	208
SSC_002272	SSC_002272-T1	963	1	963	0	0	1	792	1	33	1	138
SSC_002273	SSC_002273-T1	1686	1	1686	0	0	1	1686	0	0	0	0
SSC_002274	SSC_002274-T1	1144	2	582	1	562	2	582	0	0	0	0
SSC_002275	SSC_002275-T1	3138	8	1975	7	1163	6	915	3	777	1	283
SSC_002276	SSC_002276-T1	3267	13	1692	12	1575	13	1554	0	0	1	138
SSC_002277	SSC_002277-T1	4263	12	1910	11	2353	12	1143	1	180	1	587
SSC_002278	SSC_002278-T1	2977	10	1623	9	1354	10	1614	0	0	1	9
SSC_002279	SSC_002279-T1	1914	2	1326	1	588	2	921	1	104	1	301
SSC_002280	SSC_002280-T1	4266	5	3752	4	514	5	3297	0	0	1	455
SSC_002282	SSC_002282-T1	3610	4	3165	3	445	4	3165	0	0	0	0
SSC_002283	SSC_002283-T1	1278	4	867	3	411	4	546	1	30	1	291
SSC_002284	SSC_002284-T1	1095	3	726	2	369	3	726	0	0	0	0
SSC_002287	SSC_002287-T1	1362	5	917	4	445	5	648	1	184	1	85
SSC_002288	SSC_002288-T1	3768	9	1228	10	2540	9	834	1	73	1	321
SSC_002289	SSC_002289-T1	1938	5	1267	4	671	5	1077	0	0	1	190
SSC_002290	SSC_002290-T1	1128	1	1128	0	0	1	1128	0	0	0	0
SSC_002291	SSC_002291-T1	2203	1	2203	0	0	1	1902	1	76	1	225
SSC_002292	SSC_002292-T1	1140	1	1140	0	0	1	783	1	17	1	340
SSC_002293	SSC_002293-T1	2579	2	2233	1	346	2	2118	0	0	1	115
SSC_002294	SSC_002294-T1	1935	2	1832	1	103	2	1788	0	0	1	44
SSC_002295	SSC_002295-T1	1953	2	1856	1	97	2	1851	0	0	1	5
SSC_002296	SSC_002296-T1	3695	2	2204	1	1491	2	2169	0	0	1	35
SSC_002297	SSC_002297-T1	1662	1	1662	0	0	1	1662	0	0	0	0
SSC_002299	SSC_002299-T1	718	1	718	0	0	1	303	1	70	1	345
SSC_002301	SSC_002301-T1	1921	2	1425	1	496	2	1425	0	0	0	0
SSC_002302	SSC_002302-T1	1056	1	1056	0	0	1	858	1	87	1	111
SSC_002303	SSC_002303-T1	1254	2	1062	1	192	2	927	0	0	1	135
SSC_002304	SSC_002304-T1	2612	1	2612	0	0	1	1287	1	1118	1	207
SSC_002305	SSC_002305-T1	1167	1	1167	0	0	1	1167	0	0	0	0
SSC_002306	SSC_002306-T1	1482	2	1367	1	115	2	1194	1	62	1	111
SSC_002307	SSC_002307-T1	2968	6	2455	5	513	6	2043	0	0	1	412
SSC_002308	SSC_002308-T1	2696	4	1791	3	905	3	1173	1	236	2	382
SSC_002309	SSC_002309-T1	983	1	983	0	0	1	915	1	59	1	9
SSC_002310	SSC_002310-T1	1883	1	1883	0	0	1	930	1	229	1	724
SSC_002311	SSC_002311-T1	1698	4	1110	3	588	4	783	1	64	1	263
SSC_002312	SSC_002312-T1	2580	2	1761	1	819	2	1611	1	136	1	14
SSC_002313	SSC_002313-T1	2900	7	2029	6	871	7	1995	0	0	1	34
SSC_002314	SSC_002314-T1	3436	9	2591	8	845	9	2394	0	0	1	197
SSC_002315	SSC_002315-T1	1259	3	912	2	347	3	912	0	0	0	0
SSC_002316	SSC_002316-T1	1916	2	1207	2	709	2	975	1	58	1	174
SSC_002317	SSC_002317-T1	2513	6	1408	5	1105	6	930	1	128	1	350
SSC_002318	SSC_002318-T1	2242	2	2139	1	103	2	2022	1	31	1	86
SSC_002319	SSC_002319-T1	5951	3	2596	2	3355	3	1131	1	135	1	1330
SSC_002320	SSC_002320-T1	2937	7	1821	6	1116	7	1704	0	0	1	117
SSC_002321	SSC_002321-T1	857	2	738	1	119	2	738	0	0	0	0
SSC_002322	SSC_002322-T1	3131	3	2790	2	341	3	2790	0	0	0	0
SSC_002323	SSC_002323-T1	4029	12	1759	11	2270	12	1377	1	102	1	280
SSC_002324	SSC_002324-T1	5890	8	850	7	5040	7	765	0	0	2	85
SSC_002325	SSC_002325-T1	1516	5	1140	4	376	5	1140	0	0	0	0
SSC_002326	SSC_002326-T1	2982	4	1065	3	1917	4	1065	0	0	0	0
SSC_002327	SSC_002327-T1	2180	4	1218	3	962	4	1092	0	0	1	126
SSC_002328	SSC_002328-T1	1095	1	1095	0	0	1	1095	0	0	0	0
SSC_002329	SSC_002329-T1	2870	10	1688	9	1182	10	1455	0	0	1	233
SSC_002331	SSC_002331-T1	5021	8	2485	7	2536	8	2385	0	0	1	100
SSC_002332	SSC_002332-T1	1998	6	1253	5	745	6	906	1	105	1	242
SSC_002333	SSC_002333-T1	783	1	783	0	0	1	447	1	90	1	246
SSC_002334	SSC_002334-T1	4491	11	2403	10	2088	10	1197	2	719	1	487
SSC_002335	SSC_002335-T1	1859	5	1066	4	793	5	702	1	147	1	217
SSC_002336	SSC_002336-T1	3852	12	2018	11	1834	11	1581	2	139	1	298
SSC_002337	SSC_002337-T1	2977	9	1322	8	1655	9	615	1	125	1	582
SSC_002338	SSC_002338-T1	1754	3	1149	2	605	3	1053	0	0	1	96
SSC_002339	SSC_002339-T1	3441	2	1655	1	1786	2	1548	0	0	1	107
SSC_002340	SSC_002340-T1	2569	2	1548	1	1021	2	1527	0	0	1	21
SSC_002341	SSC_002341-T1	723	4	336	3	387	4	336	0	0	0	0
SSC_002342	SSC_002342-T1	3173	12	1711	11	1462	12	1491	1	220	0	0
SSC_002343	SSC_002343-T1	2903	8	1561	7	1342	8	1431	0	0	1	130
SSC_002344	SSC_002344-T1	1135	4	387	3	748	4	387	0	0	0	0
SSC_002345	SSC_002345-T1	7114	4	3265	3	3849	4	2226	1	831	1	208
SSC_002346	SSC_002346-T1	3008	2	2094	1	914	2	1626	1	254	1	214
SSC_002347	SSC_002347-T1	7333	11	5019	10	2314	11	4566	0	0	1	453
SSC_002348	SSC_002348-T1	3759	11	2281	10	1478	10	1833	2	384	1	64
SSC_002349	SSC_002349-T1	492	1	492	0	0	1	492	0	0	0	0
SSC_002350	SSC_002350-T1	641	1	641	0	0	1	438	1	62	1	141
SSC_002351	SSC_002351-T1	510	1	510	0	0	1	510	0	0	0	0
SSC_002352	SSC_002352-T1	1858	1	1858	0	0	1	1848	0	0	1	10
SSC_002353	SSC_002353-T1	1409	3	633	2	776	3	462	1	27	1	144
SSC_002354	SSC_002354-T1	3181	4	2849	3	332	2	1641	3	456	1	752
SSC_002356	SSC_002356-T1	4180	3	2595	2	1585	3	2127	1	259	1	209
SSC_002359	SSC_002359-T1	1633	1	1633	0	0	1	1353	1	280	0	0
SSC_002360	SSC_002360-T1	1825	2	1736	1	89	2	786	1	796	1	154
SSC_002361	SSC_002361-T1	2003	2	1838	1	165	2	1575	1	78	1	185
SSC_002362	SSC_002362-T1	2622	6	1109	5	1513	6	1098	1	11	0	0
SSC_002363	SSC_002363-T1	2454	5	1122	4	1332	5	1122	0	0	0	0
SSC_002364	SSC_002364-T1	1529	1	1529	0	0	1	765	1	357	1	407
SSC_002365	SSC_002365-T1	1411	3	1100	2	311	3	837	1	103	1	160
SSC_002366	SSC_002366-T1	461	2	378	1	83	2	378	0	0	0	0
SSC_002367	SSC_002367-T1	1660	1	1660	0	0	1	1035	1	299	1	326
SSC_002368	SSC_002368-T1	3063	8	2103	7	960	8	1626	1	62	1	415
SSC_002369	SSC_002369-T1	1112	3	836	2	276	3	681	1	91	1	64
SSC_002371	SSC_002371-T1	3088	5	2578	4	510	5	2514	1	64	0	0
SSC_002372	SSC_002372-T1	4114	9	1804	8	2310	9	1104	1	189	1	511
SSC_002375	SSC_002375-T1	3113	6	2292	5	821	6	2292	0	0	0	0
SSC_002376	SSC_002376-T1	4658	6	1478	5	3180	6	1053	1	216	1	209
SSC_002377	SSC_002377-T1	2096	5	1302	4	794	5	1047	1	47	1	208
SSC_002381	SSC_002381-T1	4125	9	2052	8	2073	9	1719	1	104	1	229
SSC_002383	SSC_002383-T1	2884	7	2253	6	631	7	2028	0	0	1	225
SSC_002384	SSC_002384-T1	2803	5	1634	4	1169	5	951	1	148	1	535
SSC_002385	SSC_002385-T1	2555	8	1329	7	1226	8	1110	0	0	1	219
SSC_002386	SSC_002386-T1	11496	25	5117	24	6379	24	4644	2	93	1	380
SSC_002387	SSC_002387-T1	3188	10	1930	9	1258	10	1686	0	0	1	244
SSC_002389	SSC_002389-T1	2153	6	1413	5	740	6	1227	1	28	1	158
SSC_002390	SSC_002390-T1	1592	4	762	3	830	4	762	0	0	0	0
SSC_002391	SSC_002391-T1	2736	9	1405	8	1331	9	1056	0	0	1	349
SSC_002393	SSC_002393-T1	1819	3	1251	2	568	3	564	1	636	1	51
SSC_002396	SSC_002396-T1	1110	3	940	2	170	3	621	1	140	1	179
SSC_002397	SSC_002397-T1	957	1	957	0	0	1	957	0	0	0	0
SSC_002398	SSC_002398-T1	2606	2	1849	1	757	2	912	1	416	1	521
SSC_002399	SSC_002399-T1	867	2	630	1	237	2	630	0	0	0	0
SSC_002403	SSC_002403-T1	2482	2	1650	1	832	2	1650	0	0	0	0
SSC_002404	SSC_002404-T1	2106	5	1131	4	975	4	510	2	364	1	257
SSC_002405	SSC_002405-T1	1777	5	1245	4	532	5	1044	1	32	1	169
SSC_002406	SSC_002406-T1	4112	3	2460	2	1652	3	2460	0	0	0	0
SSC_002407	SSC_002407-T1	3429	2	2578	1	851	2	1911	1	246	1	421
SSC_002408	SSC_002408-T1	1214	3	645	2	569	3	645	0	0	0	0
SSC_002409	SSC_002409-T1	2285	9	1479	8	806	9	1479	0	0	0	0
SSC_002410	SSC_002410-T1	1303	4	839	3	464	4	549	1	71	1	219
SSC_002412	SSC_002412-T1	480	1	480	0	0	1	477	0	0	1	3
SSC_002414	SSC_002414-T1	3811	2	1611	1	2200	2	993	1	182	1	436
SSC_002415	SSC_002415-T1	4200	12	1565	11	2635	12	1086	0	0	1	479
SSC_002417	SSC_002417-T1	742	2	649	1	93	2	501	1	72	1	76
SSC_002418	SSC_002418-T1	4110	11	2015	10	2095	10	1161	2	510	1	344
SSC_002419	SSC_002419-T1	3494	2	1675	1	1819	2	1461	0	0	1	214
SSC_002420	SSC_002420-T1	2031	2	1562	1	469	2	1401	1	46	1	115
SSC_002421	SSC_002421-T1	1999	2	1215	1	784	2	1215	0	0	0	0
SSC_002422	SSC_002422-T1	3972	2	1341	1	2631	2	1341	0	0	0	0
SSC_002423	SSC_002423-T1	421	2	298	1	123	2	298	0	0	0	0
SSC_002425	SSC_002425-T1	936	2	804	1	132	2	804	0	0	0	0
SSC_002427	SSC_002427-T1	1293	1	1293	0	0	1	1293	0	0	0	0
SSC_002430	SSC_002430-T1	1471	7	762	6	709	7	762	0	0	0	0
SSC_002431	SSC_002431-T1	1699	4	708	3	991	4	708	0	0	0	0
SSC_002432	SSC_002432-T1	902	2	562	1	340	2	561	1	1	0	0
SSC_002433	SSC_002433-T1	1758	5	814	4	944	5	756	0	0	1	58
SSC_002435	SSC_002435-T1	2924	2	1593	1	1331	2	1458	1	20	1	115
SSC_002436	SSC_002436-T1	1712	5	609	4	1103	5	609	0	0	0	0
SSC_002437	SSC_002437-T1	876	1	876	0	0	1	876	0	0	0	0
SSC_002438	SSC_002438-T1	1398	1	1398	0	0	1	1398	0	0	0	0
SSC_002439	SSC_002439-T1	2140	5	1009	4	1131	5	774	1	84	1	151
SSC_002441	SSC_002441-T1	2076	1	2076	0	0	1	2076	0	0	0	0
SSC_002444	SSC_002444-T1	738	1	738	0	0	1	738	0	0	0	0
SSC_002450	SSC_002450-T1	11088	18	2769	17	8319	18	2454	1	58	1	257
SSC_002451	SSC_002451-T1	3196	3	1500	2	1696	3	1500	0	0	0	0
SSC_002452	SSC_002452-T1	4962	10	1431	9	3531	10	1116	1	121	1	194
SSC_002453	SSC_002453-T1	840	2	744	1	96	2	744	0	0	0	0
SSC_002455	SSC_002455-T1	794	2	342	1	452	2	342	0	0	0	0
SSC_002457	SSC_002457-T1	1614	1	1614	0	0	1	801	1	381	1	432
SSC_002458	SSC_002458-T1	3785	11	1666	10	2119	11	1665	1	1	0	0
SSC_002460	SSC_002460-T1	3695	9	1056	8	2639	9	1056	0	0	0	0
SSC_002468	SSC_002468-T1	3393	2	216	1	3177	2	216	0	0	0	0
SSC_002469	SSC_002469-T1	3706	8	1560	7	2146	8	1560	0	0	0	0
SSC_002470	SSC_002470-T1	2651	3	1328	2	1323	3	1128	1	79	1	121
SSC_002471	SSC_002471-T1	7272	7	2069	6	5203	7	1926	0	0	1	143
SSC_002472	SSC_002472-T1	4827	5	3243	4	1584	5	3141	0	0	1	102
SSC_002473	SSC_002473-T1	4110	8	1329	7	2781	8	1173	0	0	1	156
SSC_002475	SSC_002475-T1	1374	2	1265	1	109	2	1224	0	0	1	41
SSC_002476	SSC_002476-T1	2044	2	1677	1	367	2	1677	0	0	0	0
SSC_002481	SSC_002481-T1	3173	3	879	2	2294	3	879	0	0	0	0
SSC_002482	SSC_002482-T1	4519	2	2535	1	1984	2	2535	0	0	0	0
SSC_002483	SSC_002483-T1	4459	6	1787	5	2672	6	1410	1	105	1	272
SSC_002485	SSC_002485-T1	8964	11	2067	10	6897	11	1485	1	171	1	411
SSC_002487	SSC_002487-T1	1831	3	1710	2	121	3	1710	0	0	0	0
SSC_002489	SSC_002489-T1	2985	6	909	5	2076	5	477	2	193	1	239
SSC_002490	SSC_002490-T1	1167	2	1056	1	111	2	1056	0	0	0	0
SSC_002491	SSC_002491-T1	2412	5	1033	4	1379	5	732	1	49	1	252
SSC_002492	SSC_002492-T1	1398	1	1398	0	0	1	1398	0	0	0	0
SSC_002493	SSC_002493-T1	11054	22	3016	21	8038	22	2727	0	0	1	289
SSC_002494	SSC_002494-T1	871	1	871	0	0	1	489	1	184	1	198
SSC_002496	SSC_002496-T1	3357	8	985	7	2372	8	669	0	0	1	316
SSC_002497	SSC_002497-T1	2039	2	1875	1	164	2	1875	0	0	0	0
SSC_002498	SSC_002498-T1	1570	4	1185	3	385	4	876	1	72	1	237
SSC_002499	SSC_002499-T1	821	3	558	2	263	3	558	0	0	0	0
SSC_002500	SSC_002500-T1	1890	3	592	2	1298	3	381	1	52	1	159
SSC_002501	SSC_002501-T1	1830	6	1073	5	757	6	855	1	76	1	142
SSC_002503	SSC_002503-T1	2605	2	1415	2	1190	2	1173	1	76	1	166
SSC_002504	SSC_002504-T1	1579	2	696	1	883	2	405	1	99	1	192
SSC_002505	SSC_002505-T1	4951	15	2804	14	2147	15	2256	1	38	1	510
SSC_002506	SSC_002506-T1	3052	1	3052	0	0	1	2346	1	135	1	571
SSC_002507	SSC_002507-T1	1729	2	1680	1	49	2	1551	0	0	1	129
SSC_002508	SSC_002508-T1	621	1	621	0	0	1	621	0	0	0	0
SSC_002509	SSC_002509-T1	735	1	735	0	0	1	735	0	0	0	0
SSC_002510	SSC_002510-T1	633	1	633	0	0	1	633	0	0	0	0
SSC_002511	SSC_002511-T1	1599	2	735	1	864	2	735	0	0	0	0
SSC_002512	SSC_002512-T1	618	1	618	0	0	1	618	0	0	0	0
SSC_002513	SSC_002513-T1	4582	2	606	1	3976	2	606	0	0	0	0
SSC_002516	SSC_002516-T1	612	1	612	0	0	1	612	0	0	0	0
SSC_002517	SSC_002517-T1	330	1	330	0	0	1	330	0	0	0	0
SSC_002518	SSC_002518-T1	1005	1	1005	0	0	1	639	1	62	1	304
SSC_002519	SSC_002519-T1	3690	5	945	4	2745	5	945	0	0	0	0
SSC_002520	SSC_002520-T1	678	1	678	0	0	1	678	0	0	0	0
SSC_002521	SSC_002521-T1	681	1	681	0	0	1	681	0	0	0	0
SSC_002522	SSC_002522-T1	666	1	666	0	0	1	666	0	0	0	0
SSC_002523	SSC_002523-T1	2166	2	2042	1	124	1	1569	0	0	2	473
SSC_002524	SSC_002524-T1	1931	2	1822	1	109	2	1728	0	0	1	94
SSC_002525	SSC_002525-T1	1179	1	1179	0	0	1	1179	0	0	0	0
SSC_002526	SSC_002526-T1	3046	6	1153	5	1893	6	735	1	47	1	371
SSC_002527	SSC_002527-T1	2860	8	1019	7	1841	7	774	2	107	1	138
SSC_002528	SSC_002528-T1	8179	13	1139	13	7040	12	1017	0	0	2	122
SSC_002529	SSC_002529-T1	1752	4	1166	3	586	4	948	1	37	1	181
SSC_002530	SSC_002530-T1	3616	6	1139	5	2477	6	537	1	148	1	454
SSC_002531	SSC_002531-T1	2580	3	1100	2	1480	3	942	1	28	1	130
SSC_002532	SSC_002532-T1	1458	3	1009	2	449	3	822	1	66	1	121
SSC_002533	SSC_002533-T1	2008	3	1238	2	770	3	825	1	104	1	309
SSC_002535	SSC_002535-T1	5562	11	2751	10	2811	11	2439	1	109	1	203
SSC_002536	SSC_002536-T1	2582	2	1096	1	1486	2	1074	0	0	1	22
SSC_002538	SSC_002538-T1	1988	2	1308	1	680	2	1308	0	0	0	0
SSC_002540	SSC_002540-T1	1895	2	1800	1	95	2	1800	0	0	0	0
SSC_002541	SSC_002541-T1	1565	2	954	1	611	2	954	0	0	0	0
SSC_002542	SSC_002542-T1	2433	4	2121	3	312	4	1929	1	25	1	167
SSC_002543	SSC_002543-T1	1385	2	1269	1	116	2	1269	0	0	0	0
SSC_002544	SSC_002544-T1	2551	4	2238	3	313	4	2238	0	0	0	0
SSC_002545	SSC_002545-T1	1082	2	966	1	116	2	966	0	0	0	0
SSC_002546	SSC_002546-T1	4164	5	3686	4	478	5	3351	0	0	1	335
SSC_002547	SSC_002547-T1	3818	4	465	3	3353	4	465	0	0	0	0
SSC_002548	SSC_002548-T1	3975	5	3548	4	427	5	3378	0	0	1	170
SSC_002549	SSC_002549-T1	4591	7	3389	6	1202	6	3267	0	0	2	122
SSC_002550	SSC_002550-T1	3984	4	3209	3	775	3	2166	0	0	2	1043
SSC_002551	SSC_002551-T1	3829	7	3063	6	766	7	3063	0	0	0	0
SSC_002552	SSC_002552-T1	768	3	405	2	363	3	405	0	0	0	0
SSC_002553	SSC_002553-T1	2792	4	1955	3	837	4	1713	0	0	1	242
SSC_002554	SSC_002554-T1	3742	9	1243	8	2499	6	636	3	281	2	326
SSC_002556	SSC_002556-T1	2927	5	2010	4	917	5	2010	0	0	0	0
SSC_002557	SSC_002557-T1	2329	9	1275	8	1054	9	783	1	62	1	430
SSC_002558	SSC_002558-T1	3088	6	1014	5	2074	6	555	1	199	1	260
SSC_002561	SSC_002561-T1	913	4	378	3	535	4	378	0	0	0	0
SSC_002567	SSC_002567-T1	800	4	477	3	323	4	477	0	0	0	0
SSC_002572	SSC_002572-T1	2059	4	1722	3	337	4	1722	0	0	0	0
SSC_002574	SSC_002574-T1	2601	1	2601	0	0	1	2601	0	0	0	0
SSC_002575	SSC_002575-T1	2898	5	1238	4	1660	4	582	2	261	1	395
SSC_002576	SSC_002576-T1	1968	1	1968	0	0	1	1968	0	0	0	0
SSC_002577	SSC_002577-T1	4665	3	3998	2	667	2	3711	0	0	2	287
SSC_002578	SSC_002578-T1	16805	2	1200	1	15605	2	573	1	356	1	271
SSC_002579	SSC_002579-T1	7341	4	4450	3	2891	2	3609	0	0	3	841
SSC_002580	SSC_002580-T1	1159	2	958	1	201	2	390	1	465	1	103
SSC_002581	SSC_002581-T1	2739	6	1702	5	1037	6	1308	1	58	1	336
SSC_002582	SSC_002582-T1	6341	14	2773	13	3568	14	2475	0	0	1	298
SSC_002585	SSC_002585-T1	558	1	558	0	0	1	558	0	0	0	0
SSC_002586	SSC_002586-T1	863	2	378	1	485	2	378	0	0	0	0
SSC_002587	SSC_002587-T1	3629	5	1107	4	2522	5	1107	0	0	0	0
SSC_002588	SSC_002588-T1	5335	6	1776	5	3559	6	1776	0	0	0	0
SSC_002589	SSC_002589-T1	1119	4	258	3	861	4	258	0	0	0	0
SSC_002590	SSC_002590-T1	1331	2	1101	1	230	2	1101	0	0	0	0
SSC_002591	SSC_002591-T1	1080	3	861	2	219	3	861	0	0	0	0
SSC_002593	SSC_002593-T1	1425	1	1425	0	0	1	1425	0	0	0	0
SSC_002595	SSC_002595-T1	1404	1	1404	0	0	1	1404	0	0	0	0
SSC_002596	SSC_002596-T1	1389	2	1320	1	69	2	1320	0	0	0	0
SSC_002597	SSC_002597-T1	5554	3	1917	2	3637	3	1536	1	202	1	179
SSC_002598	SSC_002598-T1	4208	6	1851	5	2357	6	1626	1	46	1	179
SSC_002599	SSC_002599-T1	1739	1	1739	0	0	1	1395	0	0	1	344
SSC_002601	SSC_002601-T1	1366	2	1272	1	94	2	1272	0	0	0	0
SSC_002602	SSC_002602-T1	3930	4	3402	3	528	4	3294	1	108	0	0
SSC_002603	SSC_002603-T1	1579	1	1579	0	0	1	1380	1	79	1	120
SSC_002604	SSC_002604-T1	2529	2	2063	1	466	1	1320	1	320	2	423
SSC_002605	SSC_002605-T1	1497	1	1497	0	0	1	1497	0	0	0	0
SSC_002606	SSC_002606-T1	3121	2	1968	1	1153	2	1968	0	0	0	0
SSC_002607	SSC_002607-T1	3016	3	2530	2	486	1	2256	0	0	3	274
SSC_002608	SSC_002608-T1	1371	2	1245	1	126	2	1245	0	0	0	0
SSC_002609	SSC_002609-T1	9717	7	4936	6	4781	2	4308	0	0	6	628
SSC_002610	SSC_002610-T1	3685	2	3633	1	52	2	3633	0	0	0	0
SSC_002611	SSC_002611-T1	5051	6	2501	5	2550	5	2130	2	111	1	260
SSC_002612	SSC_002612-T1	4723	3	4249	2	474	1	3825	0	0	3	424
SSC_002613	SSC_002613-T1	4156	8	2753	7	1403	7	2247	2	181	1	325
SSC_002615	SSC_002615-T1	5519	6	1685	5	3834	6	1464	1	24	1	197
SSC_002616	SSC_002616-T1	3087	6	1581	5	1506	6	1116	1	55	1	410
SSC_002617	SSC_002617-T1	2516	2	1692	1	824	1	1062	2	241	1	389
SSC_002619	SSC_002619-T1	1287	1	1287	0	0	1	1287	0	0	0	0
SSC_002620	SSC_002620-T1	2288	3	1732	2	556	2	1326	2	180	1	226
SSC_002621	SSC_002621-T1	2506	4	2028	3	478	4	2028	0	0	0	0
SSC_002622	SSC_002622-T1	2222	5	1497	4	725	5	1497	0	0	0	0
SSC_002623	SSC_002623-T1	1469	2	1267	1	202	2	855	1	28	0	0
SSC_002624	SSC_002624-T1	3876	5	1637	4	2239	5	1521	1	112	1	4
SSC_002625	SSC_002625-T1	3829	2	3421	1	408	2	2862	1	318	1	241
SSC_002626	SSC_002626-T1	7904	19	2996	18	4908	17	2628	0	0	3	368
SSC_002627	SSC_002627-T1	2310	5	1244	4	1066	5	1155	0	0	1	89
SSC_002631	SSC_002631-T1	827	2	609	1	218	2	609	0	0	0	0
SSC_002634	SSC_002634-T1	2612	2	1362	1	1250	2	885	1	64	1	413
SSC_002635	SSC_002635-T1	1979	4	1407	3	572	4	915	1	173	1	319
SSC_002636	SSC_002636-T1	4062	6	1809	5	2253	5	963	2	203	1	643
SSC_002637	SSC_002637-T1	1662	3	1143	2	519	3	1143	0	0	0	0
SSC_002638	SSC_002638-T1	652	1	652	0	0	1	525	1	65	1	62
SSC_002639	SSC_002639-T1	905	4	532	3	373	4	471	0	0	1	61
SSC_002640	SSC_002640-T1	985	1	985	0	0	1	702	1	110	1	173
SSC_002641	SSC_002641-T1	3521	4	2577	3	944	4	2274	0	0	1	303
SSC_002642	SSC_002642-T1	6617	12	3182	11	3435	12	2679	1	92	1	411
SSC_002643	SSC_002643-T1	2807	10	1663	9	1144	10	1638	0	0	1	25
SSC_002644	SSC_002644-T1	1898	2	1635	1	263	1	912	0	0	1	573
SSC_002645	SSC_002645-T1	3415	7	1989	6	1426	7	1752	1	96	1	141
SSC_002646	SSC_002646-T1	2691	8	1601	7	1090	7	1275	2	160	1	166
SSC_002647	SSC_002647-T1	3454	2	2156	1	1298	2	1386	1	264	1	506
SSC_002648	SSC_002648-T1	3971	10	1705	9	2266	9	1185	0	0	2	520
SSC_002653	SSC_002653-T1	2944	8	2313	7	631	8	1806	1	37	1	470
SSC_002655	SSC_002655-T1	3904	14	1815	13	2089	14	1815	0	0	0	0
SSC_002656	SSC_002656-T1	1935	1	1935	0	0	1	1860	0	0	1	75
SSC_002657	SSC_002657-T1	2101	2	1820	1	281	2	1563	0	0	1	257
SSC_002658	SSC_002658-T1	1499	3	1302	2	197	3	1302	0	0	0	0
SSC_002659	SSC_002659-T1	5190	2	1141	1	4049	2	987	1	58	1	96
SSC_002660	SSC_002660-T1	5395	18	1738	17	3657	18	1686	1	52	0	0
SSC_002661	SSC_002661-T1	2550	7	1249	6	1301	5	648	3	430	1	171
SSC_002662	SSC_002662-T1	1806	2	1422	1	384	1	783	2	315	1	324
SSC_002663	SSC_002663-T1	2613	3	1038	2	1575	3	1038	0	0	0	0
SSC_002664	SSC_002664-T1	3869	10	2496	9	1373	10	2112	1	78	1	306
SSC_002666	SSC_002666-T1	1788	3	1246	2	542	3	1179	0	0	1	67
SSC_002667	SSC_002667-T1	1680	3	1089	2	591	3	1089	0	0	0	0
SSC_002668	SSC_002668-T1	4447	13	1700	12	2747	13	1251	1	153	1	296
SSC_002669	SSC_002669-T1	2260	5	1008	4	1252	4	624	2	61	1	323
SSC_002671	SSC_002671-T1	1159	1	1159	0	0	1	465	1	31	1	663
SSC_002672	SSC_002672-T1	2580	8	1461	7	1119	8	1461	0	0	0	0
SSC_002673	SSC_002673-T1	1643	2	1525	1	118	2	1167	0	0	1	358
SSC_002674	SSC_002674-T1	2704	5	1670	4	1034	5	1560	0	0	1	110
SSC_002675	SSC_002675-T1	9819	15	4898	14	4921	15	4101	1	219	1	578
SSC_002676	SSC_002676-T1	1095	2	852	1	243	2	852	0	0	0	0
SSC_002677	SSC_002677-T1	2810	8	1579	7	1231	8	1212	1	195	1	172
SSC_002678	SSC_002678-T1	1112	4	762	3	350	4	762	0	0	0	0
SSC_002679	SSC_002679-T1	1365	5	1017	4	348	5	1017	0	0	0	0
SSC_002680	SSC_002680-T1	3164	4	1231	3	1933	3	1098	2	44	1	89
SSC_002681	SSC_002681-T1	1227	1	1227	0	0	1	1227	0	0	0	0
SSC_002682	SSC_002682-T1	4579	11	1782	10	2797	11	1782	0	0	0	0
SSC_002683	SSC_002683-T1	3661	12	1851	11	1810	12	1851	0	0	0	0
SSC_002684	SSC_002684-T1	2943	2	867	2	2076	2	495	1	70	1	302
SSC_002685	SSC_002685-T1	1346	4	986	3	360	4	975	0	0	1	11
SSC_002686	SSC_002686-T1	2013	3	1773	2	240	3	1773	0	0	0	0
SSC_002689	SSC_002689-T1	486	1	486	0	0	1	486	0	0	0	0
SSC_002690	SSC_002690-T1	3955	3	3542	2	413	2	2505	0	0	2	1037
SSC_002693	SSC_002693-T1	2972	6	1604	5	1368	6	1263	1	74	1	267
SSC_002695	SSC_002695-T1	446	2	312	1	134	2	312	0	0	0	0
SSC_002698	SSC_002698-T1	807	3	603	2	204	3	603	0	0	0	0
SSC_002700	SSC_002700-T1	5840	12	2005	11	3835	10	1323	2	361	2	321
SSC_002701	SSC_002701-T1	3466	6	1342	5	2124	5	690	2	318	1	334
SSC_002704	SSC_002704-T1	890	2	747	1	143	2	747	0	0	0	0
SSC_002705	SSC_002705-T1	2045	3	1846	2	199	3	1446	1	171	1	229
SSC_002708	SSC_002708-T1	2799	3	847	2	1952	3	213	1	150	1	484
SSC_002709	SSC_002709-T1	1074	1	1074	0	0	1	1032	0	0	1	42
SSC_002710	SSC_002710-T1	1087	2	360	1	727	2	360	0	0	0	0
SSC_002711	SSC_002711-T1	1290	3	993	2	297	3	993	0	0	0	0
SSC_002715	SSC_002715-T1	2348	2	1457	1	891	2	1437	0	0	1	20
SSC_002718	SSC_002718-T1	2998	8	695	7	2303	7	459	2	236	0	0
SSC_002720	SSC_002720-T1	576	1	576	0	0	1	576	0	0	0	0
SSC_002721	SSC_002721-T1	2953	8	1364	7	1589	7	954	2	72	1	338
SSC_002722	SSC_002722-T1	1645	1	1645	0	0	1	1275	1	58	1	312
SSC_002725	SSC_002725-T1	2699	7	864	6	1835	7	864	0	0	0	0
SSC_002728	SSC_002728-T1	1428	1	1428	0	0	1	1329	0	0	1	99
SSC_002729	SSC_002729-T1	873	1	873	0	0	1	873	0	0	0	0
SSC_002731	SSC_002731-T1	624	1	624	0	0	1	624	0	0	0	0
SSC_002732	SSC_002732-T1	775	1	775	0	0	1	633	1	90	1	52
SSC_002733	SSC_002733-T1	7319	15	5464	14	1855	6	2487	10	2104	1	873
SSC_002734	SSC_002734-T1	1824	3	1400	2	424	3	1023	1	171	1	206
SSC_002735	SSC_002735-T1	1693	3	1237	2	456	3	1029	1	68	1	140
SSC_002736	SSC_002736-T1	8973	22	3145	21	5828	22	2964	0	0	1	181
SSC_002739	SSC_002739-T1	1169	1	1169	0	0	1	783	1	89	1	297
SSC_002740	SSC_002740-T1	1968	3	647	2	1321	3	399	1	81	1	167
SSC_002741	SSC_002741-T1	2775	3	554	3	2221	3	294	1	82	1	178
SSC_002742	SSC_002742-T1	1443	2	880	1	563	2	456	1	108	1	316
SSC_002743	SSC_002743-T1	1918	4	1119	4	799	4	795	1	200	1	124
SSC_002745	SSC_002745-T1	1659	1	1659	0	0	1	837	1	72	1	750
SSC_002746	SSC_002746-T1	2724	5	809	4	1915	5	384	1	106	1	319
SSC_002747	SSC_002747-T1	1315	1	1315	0	0	1	606	1	418	1	291
SSC_002748	SSC_002748-T1	532	3	339	2	193	3	339	0	0	0	0
SSC_002749	SSC_002749-T1	3112	8	2216	7	896	7	1548	2	254	1	414
SSC_002750	SSC_002750-T1	931	2	624	1	307	2	441	1	53	1	130
SSC_002751	SSC_002751-T1	1675	2	1571	1	104	2	756	1	140	1	675
SSC_002752	SSC_002752-T1	729	1	729	0	0	1	729	0	0	0	0
SSC_002754	SSC_002754-T1	2107	6	1143	5	964	6	753	1	46	1	344
SSC_002755	SSC_002755-T1	1393	2	1259	1	134	2	918	1	59	1	282
SSC_002756	SSC_002756-T1	4948	14	2118	13	2830	14	1848	0	0	1	270
SSC_002758	SSC_002758-T1	4008	5	3535	4	473	5	2991	1	165	1	379
SSC_002759	SSC_002759-T1	729	1	729	0	0	1	729	0	0	0	0
SSC_002761	SSC_002761-T1	864	3	620	2	244	3	570	0	0	1	50
SSC_002762	SSC_002762-T1	3157	4	2348	3	809	3	1425	2	636	1	287
SSC_002764	SSC_002764-T1	2043	3	1506	2	537	3	1506	0	0	0	0
SSC_002765	SSC_002765-T1	2221	2	2123	1	98	2	1980	0	0	1	143
SSC_002767	SSC_002767-T1	3642	6	2826	5	816	6	2826	0	0	0	0
SSC_002768	SSC_002768-T1	3718	8	2748	7	970	8	2748	0	0	0	0
SSC_002769	SSC_002769-T1	2874	2	2769	1	105	2	2769	0	0	0	0
SSC_002770	SSC_002770-T1	2022	2	1166	1	856	1	705	2	195	1	266
SSC_002773	SSC_002773-T1	1793	2	1538	1	255	1	1011	2	517	1	10
SSC_002774	SSC_002774-T1	1250	3	1013	2	237	3	639	1	204	1	170
SSC_002775	SSC_002775-T1	4105	13	1872	12	2233	11	1479	2	53	2	340
SSC_002777	SSC_002777-T1	1409	4	954	3	455	4	768	1	68	1	118
SSC_002779	SSC_002779-T1	1668	2	1499	1	169	2	1005	1	203	1	291
SSC_002780	SSC_002780-T1	2437	4	1006	4	1431	4	672	1	42	1	292
SSC_002781	SSC_002781-T1	2392	3	1666	2	726	2	1194	1	98	2	374
SSC_002782	SSC_002782-T1	2318	1	2318	0	0	1	2043	1	9	1	266
SSC_002783	SSC_002783-T1	5988	18	1870	17	4118	18	1578	1	98	1	194
SSC_002784	SSC_002784-T1	1244	1	1244	0	0	1	897	1	62	1	285
SSC_002785	SSC_002785-T1	1945	8	1224	7	721	8	1224	0	0	0	0
SSC_002786	SSC_002786-T1	1452	5	1068	4	384	4	759	2	98	1	211
SSC_002787	SSC_002787-T1	2181	6	662	5	1519	6	645	0	0	1	17
SSC_002788	SSC_002788-T1	2717	6	1832	5	885	5	816	2	66	1	950
SSC_002789	SSC_002789-T1	2811	3	1369	2	1442	3	966	1	120	1	283
SSC_002790	SSC_002790-T1	4793	13	2512	12	2281	13	2445	0	0	1	67
SSC_002791	SSC_002791-T1	1407	1	1407	0	0	1	1407	0	0	0	0
SSC_002793	SSC_002793-T1	1571	2	1257	1	314	2	723	1	375	1	159
SSC_002794	SSC_002794-T1	2095	1	2095	0	0	1	1734	1	29	1	332
SSC_002795	SSC_002795-T1	2240	1	2240	0	0	1	1815	1	311	1	114
SSC_002797	SSC_002797-T1	1477	5	471	4	1006	5	471	0	0	0	0
SSC_002798	SSC_002798-T1	1460	3	1041	2	419	3	1041	0	0	0	0
SSC_002799	SSC_002799-T1	1211	1	1211	0	0	1	729	1	132	1	350
SSC_002800	SSC_002800-T1	999	1	999	0	0	1	999	0	0	0	0
SSC_002801	SSC_002801-T1	2239	2	2101	1	138	2	2025	0	0	1	76
SSC_002803	SSC_002803-T1	9815	6	2459	5	7356	5	2160	0	0	2	299
SSC_002804	SSC_002804-T1	2054	2	1941	1	113	1	1509	0	0	2	432
SSC_002805	SSC_002805-T1	2056	4	1299	3	757	4	1293	0	0	1	6
SSC_002807	SSC_002807-T1	3235	9	1759	8	1476	9	1401	0	0	1	358
SSC_002808	SSC_002808-T1	4416	11	2098	10	2318	10	1902	0	0	2	196
SSC_002809	SSC_002809-T1	2120	2	1883	1	237	2	1869	0	0	1	14
SSC_002810	SSC_002810-T1	3054	9	1326	8	1728	8	1038	2	245	1	43
SSC_002811	SSC_002811-T1	381	1	381	0	0	1	381	0	0	0	0
SSC_002812	SSC_002812-T1	405	1	405	0	0	1	405	0	0	0	0
SSC_002813	SSC_002813-T1	387	1	387	0	0	1	387	0	0	0	0
SSC_002816	SSC_002816-T1	2089	4	1701	3	388	4	1452	0	0	1	249
SSC_002817	SSC_002817-T1	4244	7	1455	6	2789	7	1455	0	0	0	0
SSC_002818	SSC_002818-T1	3171	8	1298	7	1873	8	1206	1	19	1	73
SSC_002820	SSC_002820-T1	1617	7	756	6	861	7	657	1	62	1	37
SSC_002822	SSC_002822-T1	1554	3	628	2	926	3	447	1	95	1	86
SSC_002823	SSC_002823-T1	2770	3	1745	2	1025	3	942	1	351	1	452
SSC_002824	SSC_002824-T1	4338	4	1797	3	2541	4	1350	1	85	1	362
SSC_002826	SSC_002826-T1	893	2	864	1	29	2	864	0	0	0	0
SSC_002828	SSC_002828-T1	3291	10	1558	9	1733	10	1005	1	282	1	271
SSC_002829	SSC_002829-T1	1268	4	931	3	337	4	825	1	15	1	91
SSC_002830	SSC_002830-T1	2691	1	2691	0	0	1	2616	0	0	1	75
SSC_002831	SSC_002831-T1	1568	2	1086	1	482	2	1086	0	0	0	0
SSC_002832	SSC_002832-T1	1581	2	1552	1	29	2	1137	1	36	1	379
SSC_002835	SSC_002835-T1	1931	2	1566	1	365	2	1566	0	0	0	0
SSC_002836	SSC_002836-T1	4301	2	1680	1	2621	2	1680	0	0	0	0
SSC_002837	SSC_002837-T1	1637	2	1287	1	350	2	609	1	82	1	596
SSC_002838	SSC_002838-T1	1925	2	1848	1	77	2	1848	0	0	0	0
SSC_002839	SSC_002839-T1	2044	2	1878	1	166	2	1878	0	0	0	0
SSC_002841	SSC_002841-T1	3309	3	1929	2	1380	3	1929	0	0	0	0
SSC_002842	SSC_002842-T1	2115	3	1764	2	351	3	1764	0	0	0	0
SSC_002843	SSC_002843-T1	1167	2	1041	1	126	2	1041	0	0	0	0
SSC_002844	SSC_002844-T1	645	1	645	0	0	1	645	0	0	0	0
SSC_002845	SSC_002845-T1	1102	4	918	3	184	4	918	0	0	0	0
SSC_002846	SSC_002846-T1	741	1	741	0	0	1	741	0	0	0	0
SSC_002847	SSC_002847-T1	1937	2	1839	1	98	2	1839	0	0	0	0
SSC_002848	SSC_002848-T1	775	1	775	0	0	1	414	1	134	1	227
SSC_002849	SSC_002849-T1	3676	11	1689	10	1987	11	1575	1	114	0	0
SSC_002850	SSC_002850-T1	522	1	522	0	0	1	522	0	0	0	0
SSC_002851	SSC_002851-T1	559	1	559	0	0	1	528	1	31	0	0
SSC_002852	SSC_002852-T1	766	3	510	2	256	3	510	0	0	0	0
SSC_002854	SSC_002854-T1	1956	2	1656	1	300	2	1206	1	73	1	377
SSC_002855	SSC_002855-T1	2666	2	2208	1	458	2	1938	1	57	1	213
SSC_002856	SSC_002856-T1	2425	9	1195	8	1230	9	924	1	108	1	163
SSC_002857	SSC_002857-T1	2682	11	1426	10	1256	11	1023	1	154	1	249
SSC_002858	SSC_002858-T1	2976	2	2327	1	649	2	1953	1	149	1	225
SSC_002860	SSC_002860-T1	1037	1	1037	0	0	1	741	1	65	1	231
SSC_002861	SSC_002861-T1	2293	4	1193	3	1100	4	891	1	146	1	156
SSC_002863	SSC_002863-T1	4115	2	2745	1	1370	2	2745	0	0	0	0
SSC_002864	SSC_002864-T1	3221	2	2286	1	935	2	2082	1	31	1	173
SSC_002865	SSC_002865-T1	3254	2	2157	1	1097	2	2061	0	0	1	96
SSC_002866	SSC_002866-T1	1249	2	342	1	907	2	342	0	0	0	0
SSC_002867	SSC_002867-T1	5243	2	2103	1	3140	2	1986	1	33	1	84
SSC_002868	SSC_002868-T1	1577	4	749	3	828	4	749	0	0	0	0
SSC_002869	SSC_002869-T1	5471	10	1679	9	3792	10	1197	1	179	1	303
SSC_002871	SSC_002871-T1	1226	2	1068	1	158	2	1068	0	0	0	0
SSC_002874	SSC_002874-T1	2789	7	1116	6	1673	7	939	1	80	1	97
SSC_002875	SSC_002875-T1	1432	3	528	2	904	3	528	0	0	0	0
SSC_002880	SSC_002880-T1	1056	1	1056	0	0	1	645	1	86	1	325
SSC_002882	SSC_002882-T1	599	2	564	1	35	2	564	0	0	0	0
SSC_002886	SSC_002886-T1	3164	2	1347	1	1817	2	786	1	296	1	265
SSC_002888	SSC_002888-T1	2368	2	1083	1	1285	2	1083	0	0	0	0
SSC_002889	SSC_002889-T1	2018	2	1080	1	938	2	1080	0	0	0	0
SSC_002890	SSC_002890-T1	970	1	970	0	0	1	951	0	0	1	19
SSC_002891	SSC_002891-T1	1016	3	756	2	260	3	756	0	0	0	0
SSC_002892	SSC_002892-T1	2160	5	1095	4	1065	5	1095	0	0	0	0
SSC_002893	SSC_002893-T1	835	4	575	3	260	4	375	1	200	0	0
SSC_002894	SSC_002894-T1	1789	4	870	3	919	4	594	1	121	1	155
SSC_002897	SSC_002897-T1	757	2	687	1	70	2	687	0	0	0	0
SSC_002900	SSC_002900-T1	924	6	423	5	501	6	423	0	0	0	0
SSC_002901	SSC_002901-T1	3569	5	1187	4	2382	5	723	1	301	1	163
SSC_002904	SSC_002904-T1	1883	6	738	5	1145	6	735	1	3	0	0
SSC_002905	SSC_002905-T1	2934	7	1602	6	1332	7	1602	0	0	0	0
SSC_002906	SSC_002906-T1	3030	10	1217	9	1813	8	732	3	219	1	266
SSC_002907	SSC_002907-T1	1747	3	1360	2	387	3	1260	1	100	0	0
[truncated: 58,221 more rows]
