# Supplementary material for: Bridging the Gap: Combining Genomics and Transcriptomics Approaches to Understand Stylosanthes scabra, an Orphan Legume from the Brazilian Caatinga
Source: Plants (Basel). 2023 Sep 13;12(18):3246. doi: 10.3390/plants12183246 (PMC10535828; doi:10.3390/plants12183246)
Supplement: Supplementary file 1 [file plants-12-03246-s001.zip › Supplementary Table S2.xlsx]

## Sheet: Plan1
	Cluster	Record	Type	From	To	Size (kb)	Core domains	CD-HIT Clusters
	Cluster 1	scaffold_1158	Putative	41743	102549	60.81	Peptidase_S10, Transferase, p450	4
	Cluster 2	scaffold_13	Lignan	343881	398612	54.73	COesterase, Dirigent	3
	Cluster 3	scaffold_140	Putative	219991	253149	33.16	Methyltransf_2, Transferase, p450	4
	Cluster 4	scaffold_1505	Lignan-Polyketide	49349	89592	40.24	Chal_sti_synt_C, Dirigent, p450	4
	Cluster 5	scaffold_1637	Putative	46713	85692	38.98	2OG-FeII_Oxy, Aminotran_1_2, DIOX_N	5
	Cluster 6	scaffold_164	Alkaloid	43338	69549	26.21	Bet_v_1, p450	3
	Cluster 7	scaffold_180	Saccharide	7182	152431	145.25	Transferase, UDPGT_2	6
	Cluster 8	scaffold_1829	Saccharide	1	56310	56.31	UDPGT_2, p450	4
	Cluster 9	scaffold_1978	Terpene	37707	59562	21.86	Terpene_synth, Terpene_synth_C	4
	Cluster 10	scaffold_2030	Terpene	1	75171	75.17	Prenyltrans, SQHop_cyclase_C, SQHop_cyclase_N	3
	Cluster 11	scaffold_212	Saccharide	197002	238292	41.29	Glycos_transf_1, UDPGT_2	3
	Cluster 12	scaffold_229	Polyketide	146132	197758	51.63	AMP-binding, Chal_sti_synt_N, p450	3
	Cluster 13	scaffold_243	Putative	180828	230442	49.61	Methyltransf_7, p450	5
	Cluster 14	scaffold_256	Putative	69656	87997	18.34	AMP-binding, p450	4
	Cluster 15	scaffold_263	Putative	152299	207777	55.48	Amino_oxidase, Cellulose_synt, oMT	4
	Cluster 16	scaffold_272	Terpene	145355	214864	69.51	Terpene_synth, Terpene_synth_C	4
	Cluster 17	scaffold_2843	Terpene	3670	59789	56.12	Terpene_synth, Terpene_synth_C, p450	3
	Cluster 18	scaffold_2994	Saccharide	1	38135	38.13	UDPGT_2, polyprenyl_synt	3
	Cluster 19	scaffold_311	Saccharide	80441	135122	54.68	AMP-binding, GMC_oxred_C, GMC_oxred_N, Glycos_transf_2	3
	Cluster 20	scaffold_3370	Putative	8263	52660	44.4	AMP-binding, p450	4
	Cluster 21	scaffold_345	Saccharide	153875	201452	47.58	UDPGT_2, p450	5
	Cluster 22	scaffold_359	Terpene	86254	144652	58.4	Terpene_synth, Terpene_synth_C	3
	Cluster 23	scaffold_37	Saccharide	114912	178378	63.47	Epimerase, UDPGT_2	5
	Cluster 24	scaffold_40	Saccharide	226289	327389	101.1	Transferase, UDPGT_2	4
	Cluster 25	scaffold_414	Saccharide	72955	139043	66.09	AMP-binding, Epimerase, UDPGT_2	3
	Cluster 26	scaffold_4194	Terpene	1	44899	44.9	SQHop_cyclase_C, SQHop_cyclase_N	4
	Cluster 27	scaffold_4707	Putative	1	31872	31.87	Aminotran_1_2, DIOX_N	4
	Cluster 28	scaffold_53	Saccharide	149597	199454	49.86	Aminotran_1_2, Glycos_transf_2, SE	3
	Cluster 29	scaffold_56	Terpene	1	65849	65.85	Terpene_synth, Terpene_synth_C, p450	4
	Cluster 30	scaffold_611	Lignan-Polyketide	138200	151797	13.6	Chal_sti_synt_C, Dirigent, Epimerase	3
	Cluster 31	scaffold_654	Terpene	1	21130	21.13	SQHop_cyclase_C, SQHop_cyclase_N	3
	Cluster 32	scaffold_732	Terpene	1	139479	139.48	Epimerase, Terpene_synth, Terpene_synth_C, p450	3
	Cluster 33	scaffold_751	Putative	115488	137787	22.3	Transferase, p450	4
	Cluster 34	scaffold_763	Putative	65574	129317	63.74	Methyltransf_2, Peptidase_S10, Transferase	4
	Cluster 35	scaffold_766	Terpene	42337	89621	47.28	Terpene_synth, Terpene_synth_C, Transferase, p450	3
	Cluster 36	scaffold_852	Putative	92669	128754	36.09	Acetyltransf_1, Transferase	4
	Cluster 37	scaffold_937	Saccharide	1	59314	59.31	2OG-FeII_Oxy, UDPGT_2, adh_short, adh_short_C2, p450	4
	Cluster 38	scaffold_97	Saccharide	197720	304624	106.9	Epimerase, UDPGT_2, p450	3
	Cluster 39	scaffold_9815	Saccharide	1	22591	22.59	Transferase, UDPGT_2	3
