# Supplementary material for: Bridging the Gap: Combining Genomics and Transcriptomics Approaches to Understand Stylosanthes scabra, an Orphan Legume from the Brazilian Caatinga
Source: Plants (Basel). 2023 Sep 13;12(18):3246. doi: 10.3390/plants12183246 (PMC10535828; doi:10.3390/plants12183246)
Supplement: Supplementary file 1 [file plants-12-03246-s001.zip › Supplementary Table S3.xlsx]

## Sheet: Plan1
Loci ID	Protein ID	AQP group	Number of NPA motifs	Transmembrana	Number of loops	NPA motif composition	H2	H5	LE1	LE2	Transcript sequence length	Number of exons	Total exon sequence length	Number of introns	Total intron sequence length	Number of CDS chunks	Total CDS sequence length	Number of 5' UTR sequences	Ttotal 5' UTR sequence length	Number of 3' UTR sequences	Total 3' UTR sequence length	MW	pI	Subcellular localization
SSC_009589	SSC_009589-T1	NIP	2	6	5	NPA	G	V	G	R	3748	5	1029	4	2719	5	846	1	50	1	133	30.78	8.75	Plasma membrane
SSC_019102	SSC_019102-T1	NIP	2	6	5	NPA	A	A	G	R	2267	5	858	4	1409	5	858	0	0	0	0	24.63	5.86	Plasma membrane
SSC_022314	SSC_022314-T1	NIP	2	6	5	NPA	W	V	A	R	1610	5	874	4	736	5	723	0	0	1	151	31.03	6.79	Plasma membrane
SSC_042179	SSC_042179-T1	NIP	2	6	5	NPA	W	V	A	R	2190	5	837	4	1353	5	837	0	0	0	0	29.06	7.37	Plasma membrane
SSC_047110	SSC_047110-T1	NIP	2	6	5	NPA	G	V	G	R	4163	5	953	4	3210	5	855	1	12	1	86	27.12	9.74	Plasma membrane
SSC_083118	SSC_083118-T1	NIP	2	6	5	NPA	W	V	A	R	2205	5	828	4	1381	5	828	0	0	0	0	24.92	5.22	Plasma membrane
SSC_002311	SSC_002311-T1	NIP	2	6	5	NPA	W	V	A	R	1698	4	1110	3	588	4	783	1	64	1	263	25.71	5.93	Plasma membrane
SSC_012109	SSC_012109-T1	NIP	2	6	5	NPA	T	V	G	R	4774	5	1266	4	3508	5	933	1	103	1	230	25.80	6.48	Plasma membrane
SSC_041944	SSC_041944-T1	NIP	2	6	5	NPA	W	V	A	R	1575	4	1097	3	478	4	783	1	84	1	230	27.09	6.60	Plasma membrane
SSC_069390	SSC_069390-T1	NIP	2	6	5	NPA	T	V	G	R	4935	5	1567	4	3372	5	930	1	285	1	352	30.39	6.74	Plasma membrane
SSC_098485	SSC_098485-T1	NIP	2	6	5	NPA	A	A	G	R	3124	6	994	5	2135	6	873	0	0	1	121	25.17	4.56	Plasma membrane
SSC_098485	SSC_098485-T2	NIP	2	6	5	NPA	A	A	G	R	3124	5	1189	4	1939	5	882	0	0	1	307	25.09	8.80	Plasma membrane
SSC_098485	SSC_098485-T3	NIP	2	6	5	NPA	A	A	G	R	3124	6	1022	5	2107	6	1017	0	0	1	5	27.00	9.17	Plasma membrane
SSC_000548	SSC_000548-T1	PIP	2	6	5	NPA	F	H	T	R	1558	4	1284	3	274	4	864	1	163	1	257	24.94	6.54	Plasma membrane
SSC_006731	SSC_006731-T1	PIP	2	6	5	NPA	F	H	T	R	1474	4	1015	3	459	4	879	1	13	1	123	26.47	7.20	Plasma membrane
SSC_072707	SSC_072707-T1	PIP	2	6	5	NPA	F	H	T	R	1329	4	946	3	386	4	879	1	67	0	0	29.78	6.34	Plasma membrane
SSC_083775	SSC_083775-T1	PIP	2	6	5	NPA	F	H	T	R	1551	4	1303	3	251	4	864	1	161	1	278	29.42	6.69	Plasma membrane
SSC_000678	SSC_000678-T1	PIP	2	6	5	NPA	F	H	T	R	1467	3	1272	2	195	3	864	1	209	1	199	27.16	9.42	Plasma membrane
SSC_009040	SSC_009040-T1	PIP	2	6	5	NPA	F	H	T	R	2049	3	1427	2	622	3	870	1	93	1	464	24.98	4.86	Plasma membrane
SSC_012360	SSC_012360-T1	PIP	2	6	5	NPA	F	H	T	R	2356	4	1247	3	1109	4	873	1	66	1	308	26.38	7.20	Plasma membrane
SSC_024366	SSC_024366-T1	PIP	2	6	5	NPA	F	H	T	R	2524	4	1319	3	1205	4	864	1	84	1	371	25.68	5.93	Plasma membrane
SSC_027302	SSC_027302-T1	PIP	2	6	5	NPA	F	H	T	R	1952	3	1496	2	456	3	870	1	116	1	510	31.09	7.80	Plasma membrane
SSC_031405	SSC_031405-T1	PIP	2	6	5	NPA	F	H	T	R	2208	4	1739	3	469	4	870	1	99	1	770	29.54	6.34	Plasma membrane
SSC_035584	SSC_035584-T1	PIP	2	6	5	NPA	F	H	T	R	1657	3	1497	2	160	3	864	1	235	1	398	30.78	8.75	Plasma membrane
SSC_035602	SSC_035602-T1	PIP	2	6	5	NPA	F	H	T	R	3022	4	1184	3	1838	4	870	1	133	1	181	25.06	4.56	Plasma membrane
SSC_039383	SSC_039383-T1	PIP	2	6	5	NPA	F	H	T	R	2817	4	1320	3	1497	4	864	1	99	1	357	28.63	9.17	Plasma membrane
SSC_062532	SSC_062532-T1	PIP	2	6	5	NPA	F	H	T	R	3156	4	1395	3	1764	4	1011	1	13	1	371	25.03	5.53	Plasma membrane
SSC_082089	SSC_082089-T1	PIP	2	6	5	NPA	F	H	T	R	2752	4	1289	3	1466	4	870	1	134	1	285	30.87	9.40	Plasma membrane
SSC_089100	SSC_089100-T1	PIP	2	6	5	NPA	F	H	T	R	3060	4	1364	3	1699	4	864	1	158	1	342	27.81	8.16	Plasma membrane
SSC_010912	SSC_010912-T1	SIP	2	6	5	NPA	V	T	P	N	4886	3	1318	2	3568	3	753	1	318	1	247	25.49	5.77	Plasma membrane
SSC_023208	SSC_023208-T1	SIP	2	6	5	NPA	F	T	P	I	2179	3	750	2	1429	3	750	0	0	0	0	30.87	6.33	Plasma membrane
SSC_048676	SSC_048676-T1	SIP	2	6	5	NPA	V	T	P	N	4721	3	1187	2	3534	3	753	1	276	1	158	31.10	8.16	Plasma membrane
SSC_073948	SSC_073948-T1	SIP	2	6	5	NPA	F	P	N	R	4679	4	873	3	3809	4	873	0	0	0	0	36.39	7.78	Plasma membrane
SSC_006657	SSC_006657-T1	TIP	2	7	6	NPA	H	I	G	R	2306	4	741	3	1565	4	741	0	0	0	0	30.84	7.28	Plasma membrane
SSC_012320	SSC_012320-T1	TIP	2	7	6	NPA	H	I	G	R	1567	3	1003	2	564	3	747	1	59	1	197	31.88	7.71	Plasma membrane
SSC_017217	SSC_017217-T1	TIP	2	7	6	NPA	H	V	A	R	1846	3	1099	2	747	3	744	1	128	1	227	31.19	7.30	Plasma membrane
SSC_017218	SSC_017218-T1	TIP	2	7	6	NPA	S	I	A	R	2561	3	826	2	1735	3	744	1	68	1	14	26.15	5.64	Plasma membrane
SSC_019013	SSC_019013-T1	TIP	2	6	5	NPA	H	I	A	L	1858	3	781	2	1077	3	768	0	0	1	13	25.95	6.14	Plasma membrane
SSC_019696	SSC_019696-T1	TIP	2	6	5	NPA	H	I	G	R	1838	3	1162	2	676	3	750	1	76	1	336	30.50	8.46	Plasma membrane
SSC_026844	SSC_026844-T1	TIP	2	6	5	NPA	H	I	A	L	1524	3	876	2	648	3	711	1	46	1	119	25.92	5.25	Plasma membrane
SSC_027599	SSC_027599-T1	TIP	2	7	6	NPA	N	I	G	C	1070	3	765	2	305	3	765	0	0	0	0	30.86	7.25	Plasma membrane
SSC_049778	SSC_049778-T1	TIP	2	7	6	NPA	H	I	G	R	1299	3	998	2	301	3	747	1	68	1	183	30.89	8.47	Plasma membrane
SSC_064873	SSC_064873-T1	TIP	2	7	6	NPA	N	I	G	C	1112	3	765	2	349	3	765	0	0	0	0	30.91	9.55	Plasma membrane
SSC_071610	SSC_071610-T1	TIP	2	7	6	NPA	H	V	A	R	1988	3	1109	2	881	3	744	1	137	1	228	31.15	8.59	Plasma membrane
SSC_086620	SSC_086620-T1	TIP	2	6	5	NPA	H	I	G	R	1824	3	1074	2	752	3	747	1	75	1	252	26.04	4.90	Plasma membrane
SSC_088465	SSC_088465-T1	TIP	2	7	6	NPA	T	I	A	R	1799	3	888	2	913	3	822	1	66	0	0	30.50	8.46	Plasma membrane
SSC_092955	SSC_092955-T1	TIP	2	7	6	NPA	H	I	G	R	1973	3	1140	2	835	3	747	1	64	1	329	26.14	5.64	Plasma membrane
SSC_006231	SSC_006231-T1	TIP	2	7	6	NPA	H	I	A	V	1406	2	1281	1	125	2	753	1	222	1	306	27.76	7.30	Plasma membrane
SSC_013254	SSC_013254-T1	TIP	2	7	6	NPA	H	I	A	V	1179	3	759	2	420	3	759	0	0	0	0	25.58	5.77	Plasma membrane
SSC_023054	SSC_023054-T1	TIP	2	7	6	NPA	H	I	A	V	1382	3	1030	2	352	3	759	1	86	1	185	25.94	5.25	Plasma membrane
SSC_025438	SSC_025438-T1	TIP	2	6	5	NPA	H	I	A	V	1496	3	1045	2	451	3	759	1	66	1	220	36.18	8.84	Plasma membrane
SSC_036567	SSC_036567-T1	TIP	2	6	5	NPA	H	I	A	V	1067	3	762	2	305	3	762	0	0	0	0	31.80	8.08	Plasma membrane
SSC_039493	SSC_039493-T1	TIP	2	7	6	NPA	H	I	A	V	1256	3	759	2	497	3	759	0	0	0	0	31.22	8.46	Plasma membrane
SSC_043570	SSC_043570-T1	TIP	2	7	6	NPA	H	I	A	V	1483	2	1348	1	135	2	753	1	315	1	280	26.01	6.14	Plasma membrane
SSC_055934	SSC_055934-T1	TIP	2	6	5	NPA	H	I	A	V	1373	3	1024	2	349	3	759	1	37	1	228	31.11	9.02	Plasma membrane
SSC_081591	SSC_081591-T1	TIP	2	7	6	NPA	H	I	A	V	1084	3	917	2	169	3	759	1	40	1	118	30.60	8.71	Plasma membrane

## Sheet: Plan3
id	NPA	Transmembrana	Loop	H2	H5	LE1	LE2
SSC_002311-T1	2	6	5	W	V	A	R
SSC_009589-T1	2	6	5	G	V	G	R
SSC_012109-T1	2	6	5	T	V	G	R
SSC_019102-T1	2	6	5	A	A	G	R
SSC_022314-T1	2	6	5	W	V	A	R
SSC_041944-T1	2	6	5	W	V	A	R
SSC_042179-T1	2	6	5	W	V	A	R
SSC_047110-T1	2	6	5	G	V	G	R
SSC_069390-T1	2	6	5	T	V	G	R
SSC_083118-T1	2	6	5	W	V	A	R
SSC_098485-T1	2	6	5	A	A	G	R
SSC_098485-T2	2	6	5	A	A	G	R
SSC_098485-T3	2	6	5	A	A	G	R
SSC_000548-T1	2	6	5	F	H	T	R
SSC_000678-T1	2	6	5	F	H	T	R
SSC_006731-T1	2	6	5	F	H	T	R
SSC_009040-T1	2	6	5	F	H	T	R
SSC_012360-T1	2	6	5	F	H	T	R
SSC_024366-T1	2	6	5	F	H	T	R
SSC_027302-T1	2	6	5	F	H	T	R
SSC_031405-T1	2	6	5	F	H	T	R
SSC_035584-T1	2	6	5	F	H	T	R
SSC_035602-T1	2	6	5	F	H	T	R
SSC_039383-T1	2	6	5	F	H	T	R
SSC_062532-T1	2	6	5	F	H	T	R
SSC_072707-T1	2	6	5	F	H	T	R
SSC_082089-T1	2	6	5	F	H	T	R
SSC_083775-T1	2	6	5	F	H	T	R
SSC_089100-T1	2	6	5	F	H	T	R
SSC_073948-T1	2	6	5	F	P	N	R
SSC_010912-T1	2	6	5	V	T	P	N
SSC_023208-T1	2	6	5	F	T	P	I
SSC_027451-T1	2	6	5	N	I	P	N
SSC_048676-T1	2	6	5	V	T	P	N
SSC_006231-T1	2	7	6	H	I	A	V
SSC_006657-T1	2	7	6	H	I	G	R
SSC_012320-T1	2	7	6	H	I	G	R
SSC_013254-T1	2	7	6	H	I	A	V
SSC_017217-T1	2	7	6	H	V	A	R
SSC_017218-T1	2	7	6	S	I	A	R
SSC_019013-T1	2	6	5	H	I	A	L
SSC_019696-T1	2	6	5	H	I	G	R
SSC_023054-T1	2	7	6	H	I	A	V
SSC_025438-T1	2	6	5	H	I	A	V
SSC_026844-T1	2	6	5	H	I	A	L
SSC_027599-T1	2	7	6	N	I	G	C
SSC_036567-T1	2	6	5	H	I	A	V
SSC_039493-T1	2	7	6	H	I	A	V
SSC_043570-T1	2	7	6	H	I	A	V
SSC_049778-T1	2	7	6	H	I	G	R
SSC_055934-T1	2	6	5	H	I	A	V
SSC_064873-T1	2	7	6	N	I	G	C
SSC_071610-T1	2	7	6	H	V	A	R
SSC_081591-T1	2	7	6	H	I	A	V
SSC_086620-T1	2	6	5	H	I	G	R
SSC_088465-T1	2	7	6	T	I	A	R
SSC_092955-T1	2	7	6	H	I	G	R
