# Supplementary material for: Bridging the Gap: Combining Genomics and Transcriptomics Approaches to Understand Stylosanthes scabra, an Orphan Legume from the Brazilian Caatinga
Source: Plants (Basel). 2023 Sep 13;12(18):3246. doi: 10.3390/plants12183246 (PMC10535828; doi:10.3390/plants12183246)
Supplement: Supplementary file 1 [file plants-12-03246-s001.zip › Supplementary Table S4.xlsx]

## Sheet: Plan1
Trinity_ID	Loci_ID	log2_FC	p-value	FDR	Symbol
Ssc_62482|c0_g1_i1	SSC_064873	10.26	4.3e-06	0.00049	PIP
Ssc_29553|c0_g1_i10	SSC_062532	13.3	1.7e-24	2.3e-19	PIP
Ssc_29553|c0_g1_i5	SSC_012360	10.01	4.1e-11	3.5e-08	PIP
Ssc_65911|c1_g1_i3	SSC_035602	5.33	7.7e-08	1.9e-05	PIP
Ssc_67211|c1_g1_i3	SSC_031405	4.47	0.00016	0.0076	PIP
Ssc_65911|c1_g1_i5	SSC_026593	7.37	0.00018	0.0083	PIP
Ssc_29553|c0_g2_i3	SSC_062532	2.3	0.0012	0.03	PIP
Ssc_29553|c0_g1_i7	SSC_023725	5.29	4.7e-05	0.0031	PIP
Ssc_29553|c0_g1_i9	SSC_062532	4.29	8.9e-05	0.0049	PIP
Ssc_66836|c0_g1_i1	SSC_082089	8.43	0.00025	0.01	TIP
Ssc_24535|c0_g1_i2	SSC_092955	3.98	4e-07	7.5e-05	TIP
Ssc_84607|c1_g1_i1	SSC_085178	4.08	2.4e-05	0.0018	TIP
Ssc_84607|c1_g2_i4	SSC_028363	7.89	0.00011	0.0058	TIP
Ssc_24535|c0_g1_i1	SSC_092955	2.36	0.00013	0.0065	TIP
