# Supplementary material for: Bridging the Gap: Combining Genomics and Transcriptomics Approaches to Understand Stylosanthes scabra, an Orphan Legume from the Brazilian Caatinga
Source: Plants (Basel). 2023 Sep 13;12(18):3246. doi: 10.3390/plants12183246 (PMC10535828; doi:10.3390/plants12183246)
Supplement: Supplementary file 1 [file plants-12-03246-s001.zip › Supplementary Table S5.xlsx]

## Sheet: Plan1
AQPs Idetification				RNA-Seq data					qPCR assay
Ssc_ID (locus)	Ssc_ID (transcript)	Group		log2FC	p-value	FDR	Expression		Primer Left	Primer Right	Efficiency (%)	Expression
Ssc_062532	Ssc_29553|c0_g1_i9	PIP		13.3	1.7e-24	2.3e-19	UR		CACTGAGTGTGATGGTGTTGG	GAAGATCATGCCACCAAAGG	94.12	UR
Ssc_012360	Ssc_29553|c0_g1_i5	PIP		10.014	4.1e-11	3.5e-08	UR		GCAAGAAGCTTTGGATCTGC	CTCCAAGAATTGGTCCAACC	91.04	UR
Ssc_035602	Ssc_65911|c1_g1_i3	PIP		5.339	7.7e-08	1.9e-05	UR		GGTTCACTTGGCTACCATCC	AGAGCTGCTCCAATGAAAGG	94.9	UR
Ssc_023725	Ssc_29553|c0_g1_i7	PIP		5.295	4.7e-05	0.0031	UR		GTTGTAGGAGGACACATCAACC	ACTGCGCCACGATGTATAGC	94.12	UR
Ssc_062532	Ssc_29553|c0_g2_i3	PIP		4.299	8.9e-05	0.0049	UR		CACTGAGTGTGATGGTGTTGG	GAAGATCATGCCACCAAAGG	100	UR
Ssc_031405	Ssc_67211|c1_g1_i3	PIP		4.477	0.00016	0.0076	UR		CAACAGAGCTCCTTCCAAGTG	CGGGTTTATATGACCACCTGAG	95.85	UR
Ssc_026593	Ssc_65911|c1_g1_i5	PIP		7.379	0.00018	0.0083	UR		GGCTCTCTACCACCAAGTCG	CGTTGGATCCATTCAGTACTTAGC	91.82	UR
REF1 (Ssc_β-tubulin)	­	­		­	­	­	­		CCGTTGTGGAGCCTTACAAT	GCTTGAGGGTCCTGAAACAA	101	­
REF2 (Ssc_Ubiquitin)	­	­		­	­	­	­		GTCTAAGGGGAGGAATGCAGAT	CAAAGATCA ACCTCTGCTGGTC	100	­
