# Supplementary figures and images for: Bridging the Gap: Combining Genomics and Transcriptomics Approaches to Understand Stylosanthes scabra, an Orphan Legume from the Brazilian Caatinga
Source: MDPI journal article supplement (doi:10.3390/plants12183246), 2023-09-13

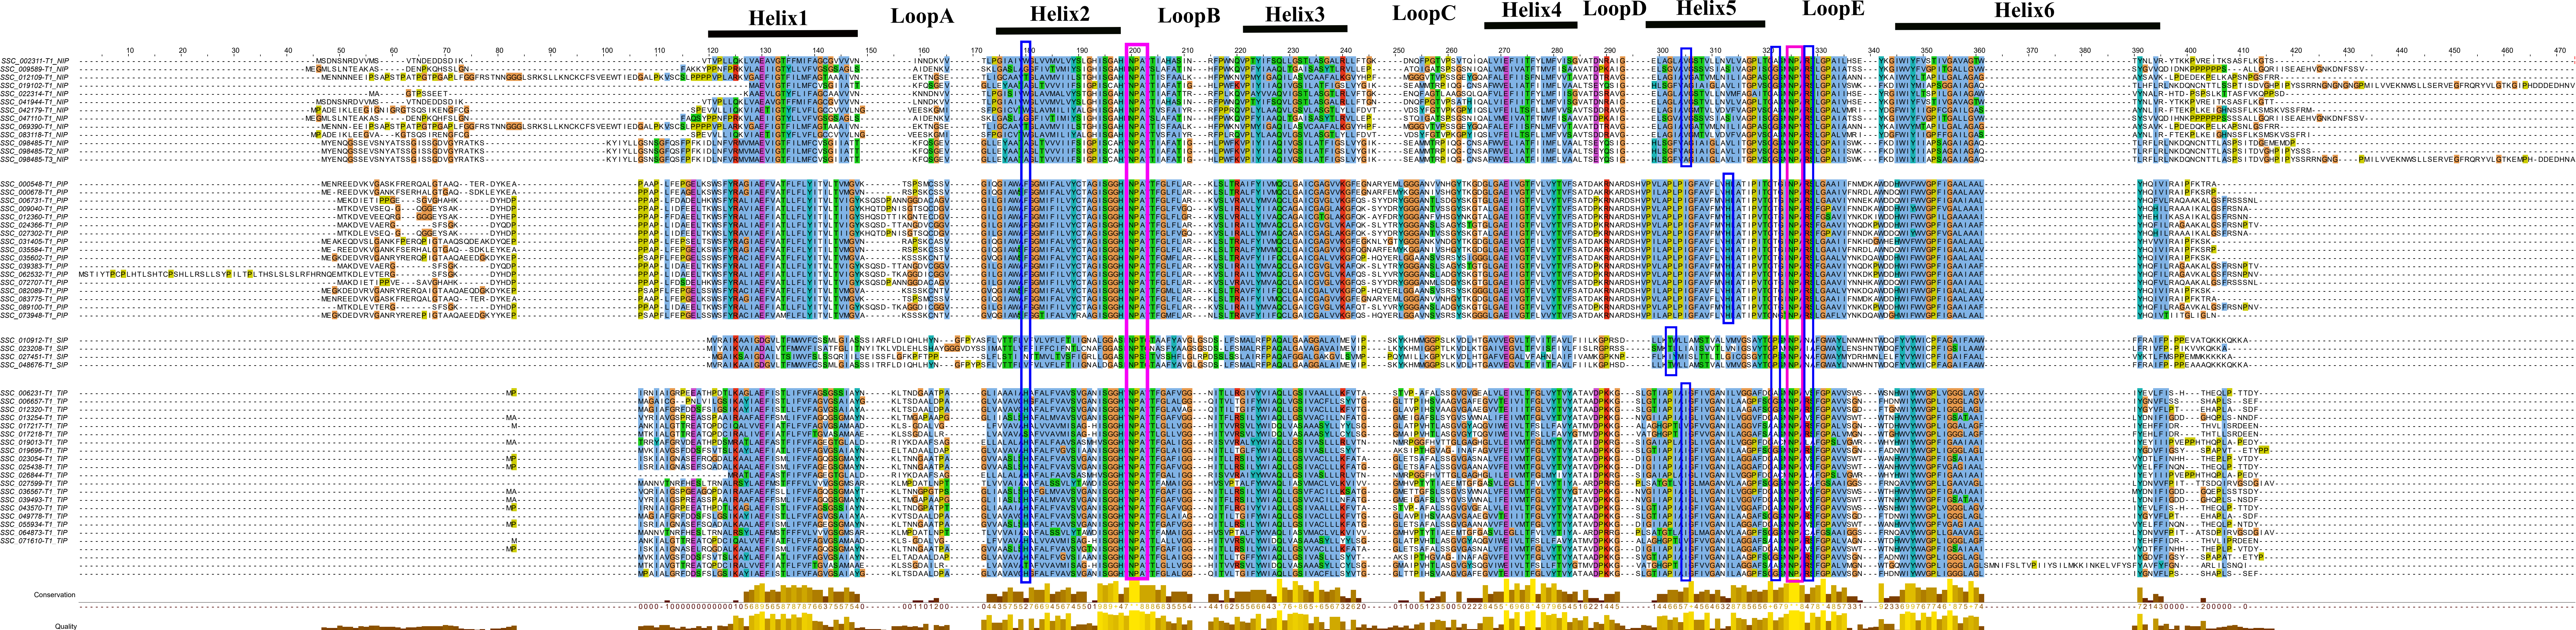

Supplement: s1 [file s1]

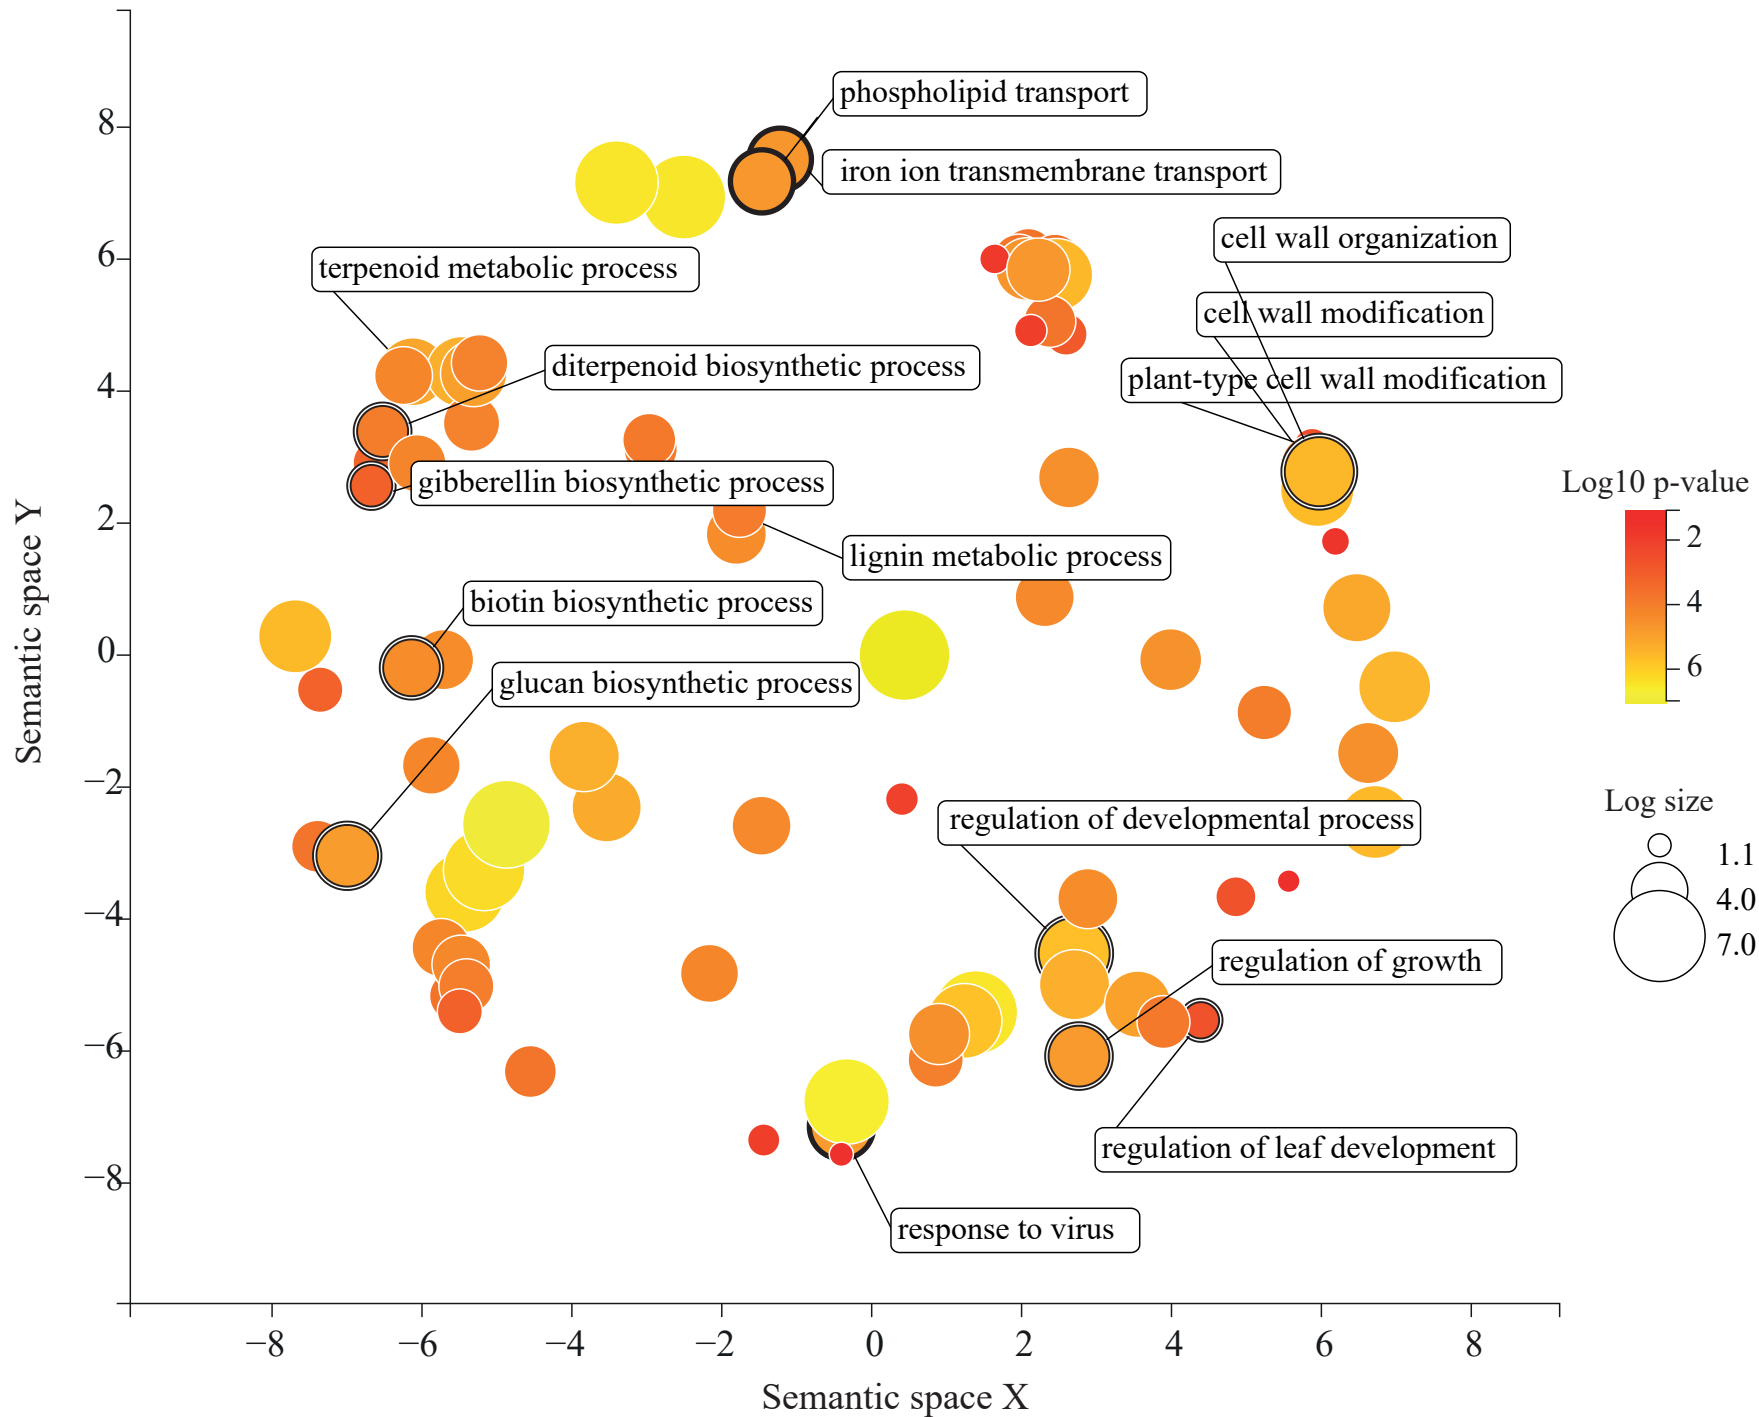

Supplement: s1 [file s1]
